# Supplementary material for: Patient experience and reflective learning (PEARL): a mixed methods protocol for staff insight development in acute and intensive care medicine in the UK
Source: PubMed Central journal article supplement — BMJ Open. 2019 Jul 24;9(7):e030679. doi: 10.1136/bmjopen-2019-030679 (PMC6661565; doi:10.1136/bmjopen-2019-030679), 2019-07-24
Supplement: bmjopen-2019-030679.draft_revisions.pdf [file bmjopen-2019-030679.draft_revisions.pdf]

# BMJ Open

BMJ Open is committed to open peer review. As part of this commitment we make the peer review history of every article we publish publicly available.

When an article is published we post the peer reviewers' comments and the authors' responses online. We also post the versions of the paper that were used during peer review. These are the versions that the peer review comments apply to.

The versions of the paper that follow are the versions that were submitted during the peer review process. They are not the versions of record or the final published versions. They should not be cited or distributed as the published version of this manuscript.

BMJ Open is an open access journal and the full, final, typeset and author-corrected version of record of the manuscript is available on our site with no access controls, subscription charges or pay-per-view fees (<http://bmjopen.bmj.com>).

If you have any questions on BMJ Open's open peer review process please email [info.bmjopen@bmj.com](mailto:info.bmjopen@bmj.com)

# BMJ Open

## PATIENT EXPERIENCE AND REFLECTIVE LEARNING (PEARL): A MIXED METHODS PROTOCOL FOR PERSONAL INSIGHT DEVELOPMENT IN HEALTHCARE

|                               |                                                                                                                                                                                                                                                                                                                                                                                                                                                                                                                                                                                                                                                                                                                                                                                                                                                                                                                                                                                                                                                                                                                                                                                                                                                                                                                                                                                                                                                                                                                                                                                                                                                                                                                                                                                      |
|-------------------------------|--------------------------------------------------------------------------------------------------------------------------------------------------------------------------------------------------------------------------------------------------------------------------------------------------------------------------------------------------------------------------------------------------------------------------------------------------------------------------------------------------------------------------------------------------------------------------------------------------------------------------------------------------------------------------------------------------------------------------------------------------------------------------------------------------------------------------------------------------------------------------------------------------------------------------------------------------------------------------------------------------------------------------------------------------------------------------------------------------------------------------------------------------------------------------------------------------------------------------------------------------------------------------------------------------------------------------------------------------------------------------------------------------------------------------------------------------------------------------------------------------------------------------------------------------------------------------------------------------------------------------------------------------------------------------------------------------------------------------------------------------------------------------------------|
| Journal:                      | <i>BMJ Open</i>                                                                                                                                                                                                                                                                                                                                                                                                                                                                                                                                                                                                                                                                                                                                                                                                                                                                                                                                                                                                                                                                                                                                                                                                                                                                                                                                                                                                                                                                                                                                                                                                                                                                                                                                                                      |
| Manuscript ID                 | bmjopen-2019-030679                                                                                                                                                                                                                                                                                                                                                                                                                                                                                                                                                                                                                                                                                                                                                                                                                                                                                                                                                                                                                                                                                                                                                                                                                                                                                                                                                                                                                                                                                                                                                                                                                                                                                                                                                                  |
| Article Type:                 | Protocol                                                                                                                                                                                                                                                                                                                                                                                                                                                                                                                                                                                                                                                                                                                                                                                                                                                                                                                                                                                                                                                                                                                                                                                                                                                                                                                                                                                                                                                                                                                                                                                                                                                                                                                                                                             |
| Date Submitted by the Author: | 26-Mar-2019                                                                                                                                                                                                                                                                                                                                                                                                                                                                                                                                                                                                                                                                                                                                                                                                                                                                                                                                                                                                                                                                                                                                                                                                                                                                                                                                                                                                                                                                                                                                                                                                                                                                                                                                                                          |
| Complete List of Authors:     | <p>Brookes, Olivia; University Hospitals Birmingham NHS Foundation Trust, Research, Development &amp; Innovation<br/> Brown, Celia; The University of Warwick, Warwick Medical School (WMS)<br/> Tarrant, Carolyn; University of Leicester<br/> Archer, Julian; Royal Australasian College of Surgeons; Peninsula College of Medicine and Dentistry<br/> Buckley, Duncan<br/> Buckley, Lisa<br/> Clement, Ian; Newcastle Upon Tyne Hospitals NHS Foundation Trust<br/> Evison, Felicity; University Hospitals Birmingham NHS Foundation Trust, Department of Health Informatics<br/> Gao, Fang; University of Birmingham, Institute of Inflammation and Ageing, College of Medical and Dental Sciences; Heart of England NHS Foundation Trust, Academic Department of Anaesthesia, Critical Care, Pain and Resuscitation<br/> Gibbins, Chris; Newcastle Upon Tyne Hospitals NHS Foundation Trust<br/> Hayton, Emma; University Hospitals Birmingham NHS Foundation Trust<br/> Jones, Jennifer; University of Leicester<br/> Lilford, Richard; University of Warwick, Division of Health and Population Sciences<br/> Mullhi, Randeep; University Hospitals Birmingham NHS Foundation Trust<br/> Packer, Greg; University Hospitals Birmingham NHS Foundation Trust<br/> Perkins, Gavin; University of Warwick, Clinical Trials Unit<br/> Shelton, Jonathan; Newcastle Upon Tyne Hospitals NHS Foundation Trust<br/> Snelson, Catherine; University Hospital Birmingham, Critical Care<br/> Sullivan, Paul; Imperial College, CLAHRC<br/> Vlaev, Ivo; Warwick Business School,<br/> Wolstenholme, Daniel; NIHR CLAHRC Yorkshire and Humber,<br/> Wright, Stephen; Newcastle upon Tyne Hospitals, Anaesthesia<br/> Bion, Julian; University of Birmingham, Intensive Care Medicine</p> |
| Keywords:                     | MEDICAL EDUCATION & TRAINING, QUALITATIVE RESEARCH, Quality in health care < HEALTH SERVICES ADMINISTRATION & MANAGEMENT                                                                                                                                                                                                                                                                                                                                                                                                                                                                                                                                                                                                                                                                                                                                                                                                                                                                                                                                                                                                                                                                                                                                                                                                                                                                                                                                                                                                                                                                                                                                                                                                                                                             |
|                               |                                                                                                                                                                                                                                                                                                                                                                                                                                                                                                                                                                                                                                                                                                                                                                                                                                                                                                                                                                                                                                                                                                                                                                                                                                                                                                                                                                                                                                                                                                                                                                                                                                                                                                                                                                                      |

1  
2  
3  
4  
5  
6  
7  
8  
9  
10  
11  
12  
13  
14  
15  
16  
17  
18  
19  
20  
21  
22  
23  
24  
25  
26  
27  
28  
29  
30  
31  
32  
33  
34  
35  
36  
37  
38  
39  
40  
41  
42  
43  
44  
45  
46  
47  
48  
49  
50  
51  
52  
53  
54  
55  
56  
57  
58  
59  
60

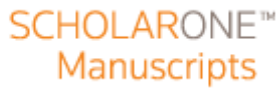

1  
2  
3 **PATIENT EXPERIENCE AND REFLECTIVE LEARNING (PEARL): A MIXED METHODS PROTOCOL**  
4 **FOR PERSONAL INSIGHT DEVELOPMENT IN HEALTHCARE**  
5

6  
7 **AUTHORS**  
8

9 Corresponding author: Olivia Brookes

10 Office G15a Ground Floor, East Block, Heritage Building (Queen Elizabeth Hospital)

11 Research & Development - University Hospitals Birmingham NHS Foundation Trust

12 Birmingham, B15 2TH

13 Email: Olivia [Brookes@uhb.nhs.uk](mailto:Brookes@uhb.nhs.uk)

14 Tel: 0121 3714205  
15  
16

17 Dr Celia Brown

18 Population Evidence and Technologies, University of Warwick, Warwick, UK  
19  
20

21 Dr Carolyn Tarrant

22 Social Science Applied to Healthcare Improvement Research (SAPPHIRE) Group, University of Leicester,

23 Leicester, UK  
24  
25

26 Prof Julian Archer

27 Royal Australasian College of Surgeons, Melbourne, Australia  
28  
29

30 Mr Duncan Buckley

31 Patient & Public Involvement Representative, Birmingham, UK  
32  
33

34 Mrs Lisa Marie Buckley

35 Patient & Public Involvement Representative, Birmingham, UK  
36  
37

38 Dr Ian Clement

39 Critical Care, Newcastle upon Tyne NHS Foundation Trust, Newcastle, UK  
40  
41

42 Felicity Evison

43 Informatics Department, University Hospitals Birmingham NHS Foundation Trust, Birmingham, UK  
44  
45

46 Prof Fang Gao Smith

47 Institute of Inflammation & Ageing, University of Birmingham, Birmingham, UK  
48  
49

50 Dr Chris Gibbins

51 Acute Medicine, Newcastle upon Tyne NHS Foundation Trust, Newcastle, UK  
52  
53

54 Dr Emma Hayton

55 Acute Medicine, University Hospitals Birmingham NHS Foundation Trust, Birmingham, UK  
56  
57

58 Dr Jennifer Jones

59 Social Science Applied to Healthcare Improvement Research (SAPPHIRE) Group, University of Leicester,

60 Leicester, UK

Prof Richard Lilford

Applied Health Research & Delivery, University of Warwick, Warwick, UK

1  
2  
3  
4 Dr Randeep Mullhi

5 Critical Care, University Hospitals Birmingham NHS Foundation Trust, Birmingham, UK  
6  
7

8 Dr Greg Packer

9 Critical Care, University Hospitals Birmingham NHS Foundation Trust, Birmingham, UK  
10

11 Dr Gavin Perkins

12 Critical Care Medicine, University of Warwick, Warwick, UK  
13  
14

15 Dr Jonathan Shelton

16 Critical Care, Newcastle upon Tyne NHS Foundation Trust, Newcastle, UK  
17

18 Dr Catherine Snelson

19 Critical Care and Acute Medicine, University Hospitals Birmingham NHS Foundation Trust, Birmingham, UK  
20  
21

22 Dr Paul Sullivan

23 Acute Medicine, Chelsea and Westminster NHS Trust, London, UK  
24

25 Prof Ivo Vlaev

26 Behavioural Science, University of Warwick, Warwick, UK  
27  
28

29 Daniel Wolstenholme

30 NIHR CLAHRC Yorkshire and Humber, Sheffield, UK  
31

32 Dr Stephen Wright

33 Critical Care, Newcastle upon Tyne NHS Foundation Trust, Newcastle, UK  
34  
35

36 Prof Julian Bion

37 Anaesthesia & Critical Care, University of Birmingham, Birmingham, UK  
38  
39  
40  
41  
42

43 **Main paper current word count (excl. abstract, acknowledgements & references): 4365 words**  
44  
45  
46  
47  
48  
49  
50  
51  
52  
53  
54  
55  
56  
57  
58  
59  
60

## ABSTRACT

**Introduction:** Patient and staff experiences are strongly influenced by attitudes and behaviours, and provide important insights into care quality. Patient and staff feedback could be used more effectively to enhance behaviours and improve care through systematic integration with techniques for reflective learning.

**Aim:** To develop a reflective learning framework and toolkit for healthcare staff to improve patient, family and staff experience.

**Methods & Analysis:** Local project teams including staff and patients from the Acute Medical Units (AMUs) and Intensive Care Units (ICUs) of three NHS Trusts will implement two experience surveys derived from existing instruments: a continuous patient and relative survey; and an annual staff survey. Survey data will be supplemented by ethnographic interviews and observations in the workplace to evaluate barriers to and facilitators of reflective learning.

Using facilitated iterative co-design, local project teams will supplement survey data with their experiences of health care to identify events, actions, activities and interventions which promote personal insight and empathy through reflective learning. Outputs will be collated by the central project team to develop a reflective learning framework and toolkit which will be fed back to the local groups for review, refinement, and piloting. The development process will be mapped to a conceptual theory of reflective learning which combines psychological and pedagogical theories of learning, alongside theories of behaviour change based on COM-B (Capability, Opportunity and Motivation influencing Behaviour).

**Output:** A locally-adaptable workplace-based toolkit providing guidance on using reflective learning to incorporate patient and staff experience in routine clinical activities.

**Ethics:** The PEARL Project has received ethics approval from the London Brent Research Ethics Committee (REC Ref 16/LO/224).

**Abstract word count (excl. key words): 266 words**

**Key words:** behaviour change, empathy, medical care, patient experience, quality improvement, reflective learning, staff experience

**ARTICLE SUMMARY: STRENGTHS AND LIMITATIONS OF THIS STUDY**

- PEARL links together theories of reflection and learning with those of behaviour change (COM-B) in a novel framework.
- Information from patient and staff surveys will provide insights into barriers to and facilitators of reflective and empathic behaviours.
- Observations by ethnographers will provide information about the capability, opportunity and motivation of staff to reflect effectively.
- Using co-design techniques, patients, relatives, and clinical staff will develop workplace-based interventions for stimulating reflection.
- The reflective learning toolkit will require testing subsequently in a prospective cluster-randomised clinical trial.

For peer review only

## INTRODUCTION

Patient and staff experiences provide important insights into care quality, but health systems have difficulty using these experiences to improve care, particularly those related to attitudes, behaviours and culture [1-5]. Reflective learning underpins approaches to improving non-technical skills, but the processes by which experiences are translated into reflection, and reflection into behavioural change are not well understood. We present a protocol for developing a toolkit to help frontline staff use patient and staff experiences to promote reflective learning, defined as an experiential process of personal insight development, in which one's own and others' experiences produce changes in behaviours.

### **1: Patient and staff experiences offer important insights into healthcare quality.**

Patient and staff experiences offer important insights into the quality of healthcare which complement organisational-level data on processes and outcomes [6-8]. Patient experience is an explicit outcome measure in the UK National Health Service (NHS) [9-10], and in the regulation of care quality [11]. All NHS Trusts are required to collect patient experience data through surveys [12, 13] and are available through patient complaints [14]. In the USA patients are surveyed through the Hospital Consumer Assessment of Healthcare Providers and Systems [15] while in Australia health organisations are required to involve consumers in accreditation processes [16].

Staff experience also provides insights into care quality: earlier action on staff concerns could have mitigated failings in care [17-18]. The NHS staff survey has been conducted annually since 2003 [19]. Patients and staff appear to share complementary insights into care quality: patient satisfaction is higher in hospitals in which nurses also reported better care quality [20, 21]. Patient and staff perceptions appear to offer both overlapping and unique insights into safety in hospital [22].

### **2: Patient and staff experience is strongly influenced by staff attitudes and behaviours.**

The NHS National Inpatient Survey asks respondents to rate their overall experience on a scale of zero ('very poor') to 10 ('very good'). In 2017, 50% of respondents rated their experience as 9 or above [12]. This indicates that there are substantial opportunities within the health system for 'learning from excellence' [23]. However, 'good' ratings by patients (as opposed to 'very good') may also disguise important opportunities for improvement [24]. A survey by Healthwatch England suggests that half of those experiencing substandard care do not report it [25]. Patients who respond to surveys with perfect ratings but with negative free text frequently describe lapses in staff behaviours and attitudes [26], such as communication, empathy, courtesy, consideration, compassion and patient focus. A study of patient-reported safety incidents found that 22% were related to communication failures alone [27], while a systematic review of patient complaints [28] judged that one third were related to staff-patient relationships. This may be an underestimate: at the Queen Elizabeth Hospital in Birmingham



1  
2  
3 local analysis shows that while non-technical aspects of patient care caused 37.7% of all issues  
4 raised, they were mentioned in 67.1% of all complaints (data on file). Non-technical issues are  
5 also likely drivers of staff dissatisfaction, as demonstrated by the 487,727 respondents to the  
6 NHS Staff survey in 2017 [29]. These data suggest that patient and staff experience, both  
7 positive and negative, provides an important opportunity for improvement through behaviour  
8 modification.  
9  
10  
11

### 12 **3: Patient and staff experience data are not used optimally to change behaviours.**

13  
14  
15 Using patient experience to improve care is not a trivial task [30]. Lapses in care are usually  
16 multifactorial, the product of interactions between the individual and the 'system'; but from the  
17 perspective of the patient, quality is largely about fiduciary relationships with specific  
18 individuals [31]. Trust Boards must contend with the competing priorities of hundreds of quality  
19 indicators each month, and may prioritise avoiding falling below a quality threshold rather than  
20 achieving higher values of a performance standard once met. A review in 2012 which examined  
21 how hospitals had used research from the UK's national in-patient survey concluded that 'simply  
22 providing hospitals with patient feedback does not automatically have a positive effect on  
23 quality standards' [32]. Even Trusts with a tradition of collecting and using patient survey data  
24 may struggle to convert these data into tangible improvements [33]. In a study of 50 clinical  
25 and managerial staff in three English hospitals, Sheard et al [34] found that the collection of  
26 patient experience feedback was a 'self-perpetuating industry' conducted 'at the expense of  
27 pan-organizational learning or improvements'; ward staff had difficulty using patient feedback.  
28 They concluded that 'macro and micro prohibiting factors come together in a perfect storm  
29 which [prevent] improvements being made'. In a systematic review Gleeson reported that  
30 'Patient experience data were most commonly...used to identify small areas of incremental  
31 change to services that do not require a change to clinician behaviour' [35]. Institutional  
32 commitment to using patient feedback may not be reflected at the front-line, where single  
33 individuals can adversely influence other members of staff [36]. Conversely, frontline staff can  
34 struggle to get their voices heard at senior levels: one of the recommendations of the Mid Staffs  
35 enquiry [17] has been to establish 'Freedom To Speak Up Guardians' in all NHS Trusts to ensure  
36 that staff concerns are heard and acted on [37]. These findings indicate that changing  
37 behaviours requires a change in underlying attitudes at individual, group and organisational  
38 levels. How is this best achieved?  
39  
40  
41  
42  
43  
44  
45  
46  
47  
48

### 49 **4: Changing attitudes and behaviours involves learning through reflection.**

50  
51 Behavioural modification is a key societal preoccupation [38]. A large number of techniques  
52 exist: a proposed behaviour change taxonomy has so far identified 93 different interventions  
53 [39-40]. However, evidence supporting the primacy of one technique over another is not strong  
54 [41-42]. Many interventions involve personal insight development through reflection, but few  
55 behaviour change theories express this explicitly. One which does is the COM-B model [43]  
56 which assimilates nineteen behaviour change theories into a single framework in which the  
57 Behaviour of interest has three determinants, each with two subtypes: Capability (physical and  
58  
59  
60

1  
2  
3 psychological); **O**pportunity (physical and social); and **M**otivation (reflective and automatic).  
4 The automatic subtype for Motivation relies on heuristics, is engaged in conditions of  
5 complexity and stress, and maps to Daniel Kahneman's 'System 1' thinking [44]. The reflective  
6 component is slower, more effortful and analytical ('System 2' thinking). These two subtypes of  
7 motivation map to the 'peripheral' and 'central' routes described in the Elaboration Likelihood  
8 Model of Persuasion [45-46]. Factors influencing motivation (particularly the automatic subtype)  
9 are summarised in the acronym MINDSPACE: Messenger, Incentives, Norms, Defaults, Salience,  
10 Priming, Affect, Commitment and Ego [47]. As the behaviour of interest here is reflection itself,  
11 we need to consider both the automatic factors which influence the desire to reflect and the  
12 more effortful elements of 'reflecting on the need for reflection'. We consider next how  
13 theories of reflection as a behaviour link to theories of reflective learning as a tool for personal  
14 insight development.  
15  
16  
17  
18  
19

20  
21 How does reflection stimulate learning? Kolb presented reflection as a four-stage model:  
22 experience; observation; analysis; and recalibration [48]. Schon described reflection 'in-action',  
23 and 'on-action' [49]. Others emphasise the importance of an emotional component to reflective  
24 learning [50], including the "disorientating dilemma" [51], the realisation that there is a gap  
25 between desired and actual behaviours. Sandars describes reflection as a metacognitive process  
26 that creates a greater understanding of self and situation to inform future actions [52]: looking  
27 back to look forward. This involves a transition from tacit to explicit knowledge [53], in which  
28 socially-acquired norms of behaviour [54] are modified either through individual reflection or,  
29 more powerfully, through group activities [55]. The process shares similarities with Broadwell's  
30 four stages of competence [56]: unconscious incompetence (unaware of problem), conscious  
31 incompetence (data received, now being processed), conscious competence (using data to  
32 improve or disseminate excellence), and unconscious competence (effortless excellence).  
33 Effective reflection appears to involve making this transition, while recalibrating and  
34 reinterpreting experience in-action and on-action. We present a possible model linking theories  
35 of reflective learning to theories of behaviour change in Figure 1.  
36  
37  
38  
39  
40  
41  
42  
43  
44  
45  
46  
47  
48  
49  
50  
51  
52  
53  
54  
55  
56  
57  
58  
59  
60

Figure 1: Conceptual model linking theories of behaviour change to those of reflective learning

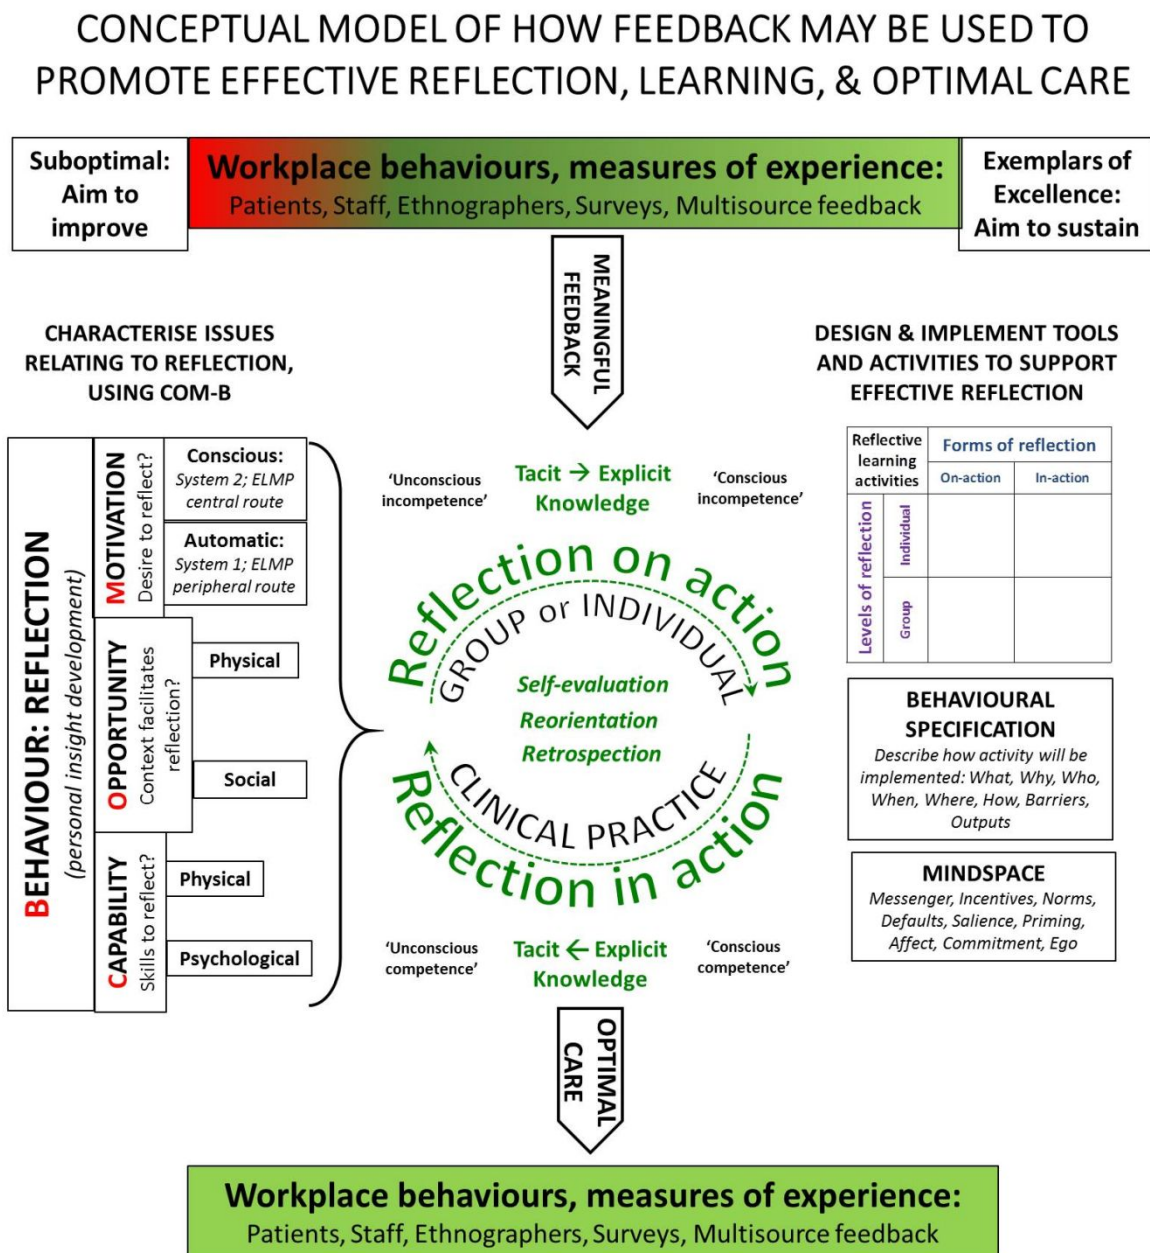

**5: Reflective learning could be deployed more effectively to improve care quality.**

First described by Dewey in 1933 [57], reflective learning is now a mandatory tool in the education of health professionals. In the UK, the General Medical Council and others define reflective practice as *‘the process whereby an individual thinks analytically about anything relating to their professional practice with the intention of gaining insight and using the lessons learned to maintain good practice or make improvements where possible’*. They state that *‘Reflecting on ..... experiences is vital to personal wellbeing and development, and to improving the quality of patient care’* [58]. Reflection is incorporated in all healthcare postgraduate training programmes in the UK, and evidence of reflecting on patient and colleague (‘multi-

1  
2  
3 source') feedback is required for physicians' continuing professional development and  
4 revalidation.  
5

6  
7 However, despite the widespread acceptance of reflection as a tool for self-improvement, its  
8 utility in enhancing performance is uncertain [59-60], as is the efficacy of using patient  
9 experience surveys to promote reflection [61]. People are biased towards favourable events  
10 and judgements [62], and doctors tend to reject the validity of adverse patient feedback [63].  
11 Undesirable information is processed as a threat with physiological correlates, which can  
12 impede learning [64]. Effective reflection requires the emotional strength and capacity to take a  
13 critical view of one's skills, attitudes and behaviours, which may be lacking amongst poor  
14 performers [65]. In the UK, doctors are concerned that honest reflections documented in  
15 personal portfolios might incriminate them in a court of law [66].  
16  
17  
18  
19

20  
21 Communication skills training should provide an opportunity for reflection. However, a review  
22 of 243 studies of teaching communication skills to medical undergraduates identified only 16  
23 interventional studies and only two of these reported behavioural outcomes [67], making it  
24 difficult to determine whether 'communication skills' are sufficient, or even if such courses are  
25 effective at all. At postgraduate level, the effects of communication skills training appear to be  
26 weak or evanescent [68-73], and in one RCT were associated with worse depression amongst  
27 patients in the intervention group [74].  
28  
29  
30

31  
32 By contrast, interventions focused on engaging staff in workplace-based activities which  
33 improve teamworking [75], insight, patient-centred care and empathy may be more effective  
34 and more durable [76-87]. The Cleveland Clinic offers short videos on empathy [88], and similar  
35 internet-based resources demonstrate how emotion may be engaged to stimulate reflection  
36 and promote mutual understanding [89-90]. For reflective learning to improve patient and staff  
37 experience, it must do so by changing 'hearts and minds'. This is the focus of our research.  
38  
39  
40

#### 41 **AIMS & OBJECTIVES:**

42  
43 We aim to develop methods for using patient and staff experiences to promote effective  
44 reflection and patient-centred care.  
45  
46

47 Specific objectives include:

- 48 1. Developing a programme theory linking experiential feedback to reflective learning and  
49 behaviour change.
- 50 2. Establishing surveys for recording patient and staff experience.
- 51 3. Determining attitudes to, and uses of, patient and staff experience data.
- 52 4. Determining attitudes to, and techniques for, reflective learning.
- 53 5. Mapping factors which influence reflective learning to the COM-B model of behaviour  
54 change.
- 55 6. Developing and piloting methods for incorporating effective reflection in routine  
56 practice.  
57  
58  
59  
60

## OUTPUTS:

The primary output will be guidance on effective reflective learning, in the form of a framework and toolkit.

Secondary outputs include data on patient and staff experience, how staff use these data to promote reflective learning, and how staff propose to include reflective learning in routine activities in the workplace.

## STUDY DESIGN:

This is a three-year mixed-methods observational study using patient and staff co-design techniques.

In subsequent research, we intend to evaluate the utility of the reflective learning toolkit in a cluster randomised step-wedge trial.

## PARTICIPANTS AND SETTING:

Participants include clinical and managerial staff and patients and relatives from the three acute medical units (AMUs) and five intensive care units (ICUs) of three large urban hospital Trusts: the Queen Elizabeth Hospital Birmingham, Heartlands Hospital Birmingham, and Newcastle upon Tyne NHS Foundation Trust (Royal Victoria Infirmary and Freeman Hospitals). Each AMU and ICU will have a project group, and these will come together as site teams lead by a senior clinician. Meetings will be chaired by a non-executive director. Local project teams will be asked to ensure inclusion of at least two patient representatives. The research will be directed by the central project team which includes patient representatives, clinicians, social scientists, a behavioural psychologist, an educationalist and a co-design expert. Project governance will be overseen by an independent project steering committee.

The study is located in acute and emergency care settings for several reasons: acutely ill patients represent at least 50% of all hospitalised NHS patients; acute illness accentuates sensitivity to staff behaviours; emergency care creates particular demands on the non-technical skills of staff; and both environments demand a high degree of multidisciplinary team working. Intensive care units offer a much higher ratio of nurses and doctors to patients than AMUs which provides an opportunity for comparison.

## DEFINITIONS AND PROGRAMME THEORY:

As stated above, we define reflective learning as an experiential process of personal insight development, in which one's own and others' experiences are used to produce a change in behaviours. The PEARL programme theory (figure 1) integrates theories of reflective learning with theories of behaviour change, as described in the introduction, using the approach



recommended by the MRC for the development and evaluation of complex interventions [91]. Our target behaviour is engagement in effective reflection, with consequential acquisition of insight, behavioural change and improvements to practice/standards of care. The COM-B model [43] will be used to characterise Capability, Opportunity, and Motivation to engage in individual and group reflection, and this analysis will inform the development of tools to support the embedding of reflection in practice. This will be facilitated through the use of the PEARL-formatted COM-B diagram (figure 2) as a diagnostic tool. Diverse activities involving reflection in-action, on-action, solitary and group, can be documented in the box to the left of the diagram. The boxes on the right permit recording of facilitators or inhibitors of the three determinants of behaviour – motivation, opportunity and capability – and their subtypes. We will adapt the programme theory in the light of experience as the project proceeds.

Figure 2: PEARL diagnostic framework using the COM-B model

### COM-B Diagnostic Framework for Reflection

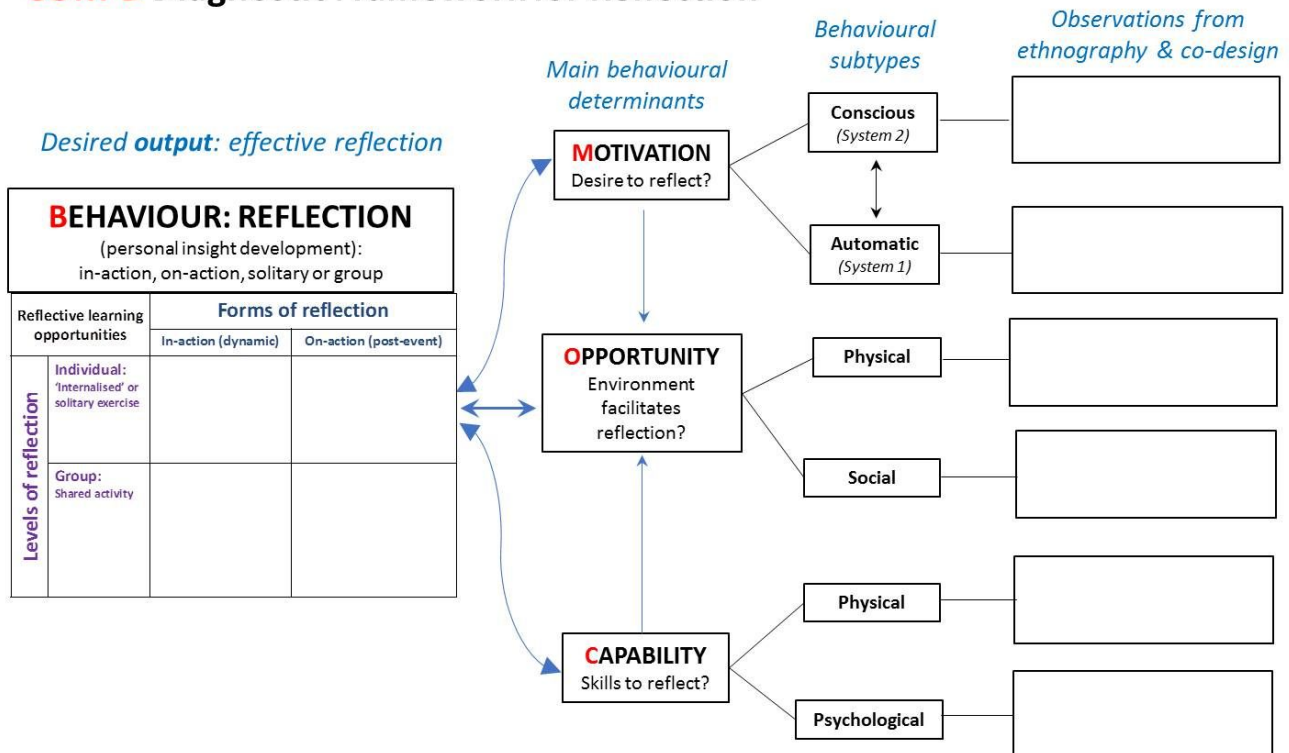

## METHODS AND ANALYSIS:

Figure 3: PEARL Project Gantt Chart

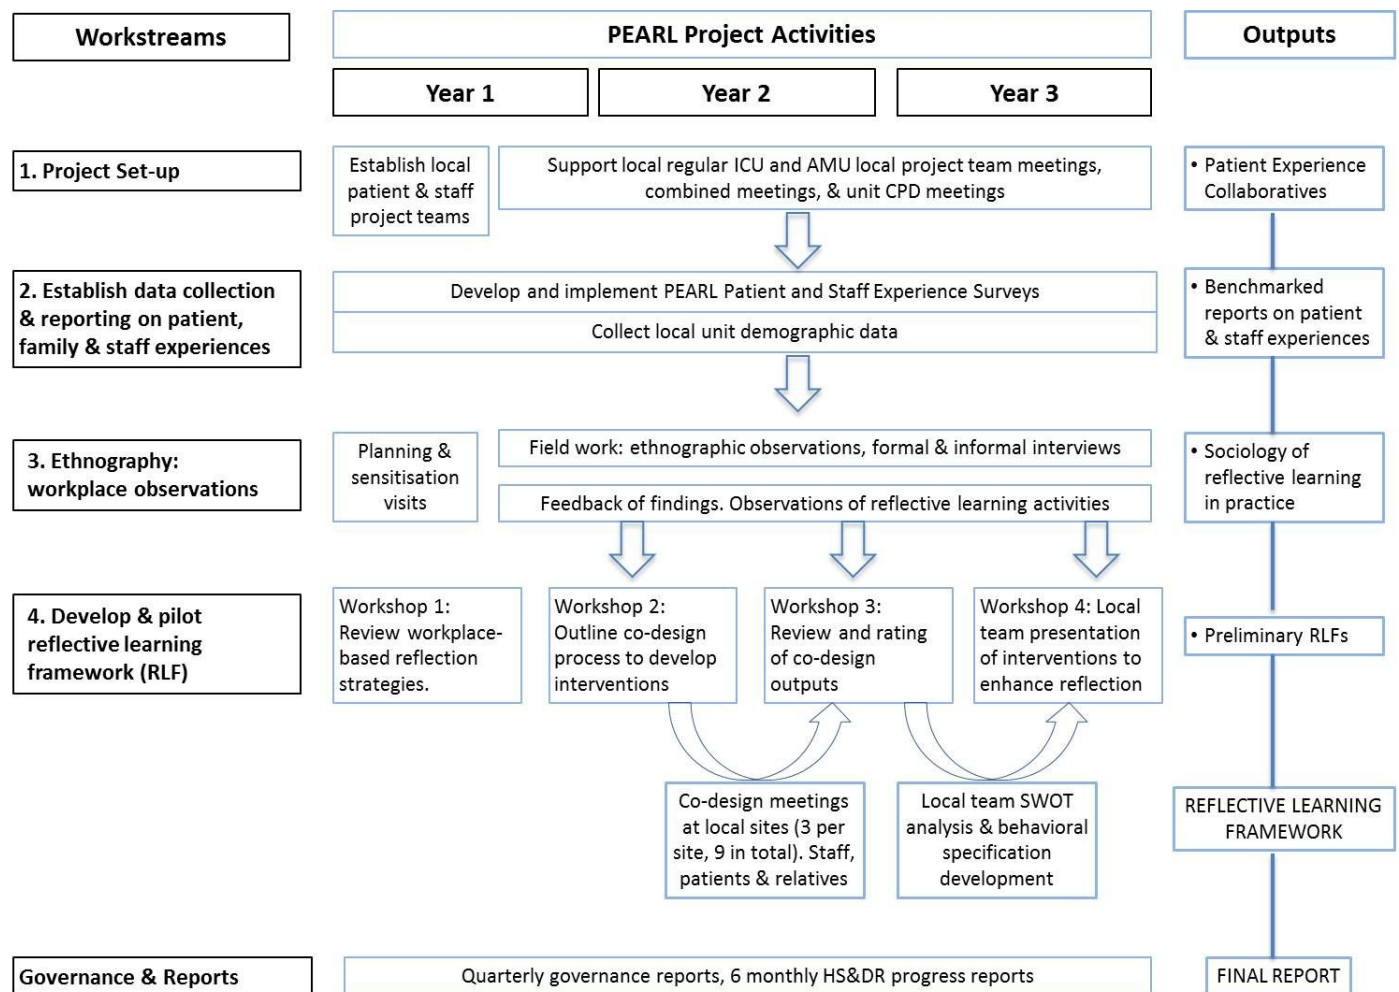**Workstream 1: Project Set-up**

We will establish local site project groups as 'communities of practice' [92-93], based on our earlier work showing that clinicians disengaged by multiple quality improvement policy initiatives are more motivated when they have professional ownership of the process and when performance feedback is linked to particular patients or events [94-95]. Local project groups will include a non-Executive Trust Director, patient representatives, and AMU and ICU clinical and managerial staff. Opportunities for feedback and reflection will be identified and local arrangements for project delivery agreed. This includes the process for acquiring, analysing, reporting and benchmarking of data from surveys and local performance and quality data. Local project teams will be asked to hold meetings once every two months to review project outputs, encourage team reflection (for example through existing meetings, team briefs and formal reports) and consider methods for incorporating feedback in routine practice.

## Workstream 2: Experiential data collection

Patient and staff experience data collected routinely in the NHS do not enable responses to inform practice at unit level, and usually do not offer or report free-text responses. Duplication of questions between surveys is common; none simultaneously addresses issues of communication, clinical care, patient safety, satisfaction, and response to feedback. We will therefore select previously validated questions across different questionnaires to create a single, parsimonious survey for patients and relatives, and a separate survey for staff. Both questionnaires will be anonymous, paper-based, permit optical character recognition, employ a 5-point scale for rating agreement, and offer free-text for additional information. Questionnaires will be accompanied by a reply-paid envelope and covering letter. Survey forms will be returned to the central project team to be digitised, analysed, and reported to each Trust's local project lead. Free-text responses will be transcribed and analysed using NVivo. Response rates will be determined from denominator data for each survey group.

Patient & Relative Experience Survey: the questionnaire will be developed from the Family Satisfaction Survey (FS-ICU) [96-98], the Adult In-Patient Survey [12], and the Friends and Family Test (F&FT) [13]. The questionnaire will be offered continuously throughout the project to patients and relatives who have spent > 24 hrs in the AMU , and to all relatives of patients in the ICU > 48hrs. Different methods of distribution will be trialled by the individual teams before definitive implementation. Denominator data will be collected from Trust admission databases to calculate response rates. A covering letter will be provided with the questionnaire, suitably adapted for bereaved families.

Staff Experience Survey: The aim of this survey is to gain insights into individual, contextual and organisational influences on staff behaviour, and attitudes to the use of patient experience for reflection and improvements in care. Questions will be derived from the following validated questionnaires: NHS Staff Core Survey [19], the Staff F&FT [99], Hospital Survey on Patient Safety Culture [100], Teamwork and Safety Climate Survey [101], GMC Trainee Survey [102], and the Self-Reflection and In-Sight Scale (SIRS)[103]. Additional questions will be developed by the central project team to investigate attitudes towards the use of feedback for reflection. Local project teams will be invited to participate in a modified Delphi method to prioritise questions for the final set.

The staff survey will be offered over a two month period during year 2 and year 3 of the project. Free-text will be transcribed and analysed using NVivo. Results will be collated in unit-specific reports benchmarked against aggregated data for the group as a whole, and where this is available, against national performance reports.

## Workstream 3: Ethnography

This workstream has two phases. *Phase 1* will employ site visits, interviews with around 40 front-line and managerial staff, and workplace-based observations of up to five days per



1  
2  
3 participating site, to describe the current use of patient experience data, to explore options for  
4 the feedback of data as part of the reflective learning process, and to investigate barriers to and  
5 opportunities for workplace-based reflective learning. *Phase 2* will focus on observations of co-  
6 design workshops, and of the implementation and piloting of components of the toolkit in  
7 practice. Findings from both phases will be used to inform the development of the reflective  
8 learning framework and toolkit in workstream 4.  
9  
10

11  
12 Observations and interviews will be conducted by ethnographers (social scientists) experienced  
13 in making observations in the clinical environment. Publicly visible information sheets  
14 describing the project will be provided in clinical areas. Informed written consent will be  
15 obtained for formal interviews. No staff identifiers (other than professional status/occupational  
16 group) will be collected.  
17  
18  
19

20  
21 Analysis of data will occur over the course of the fieldwork period. Interviews and field notes  
22 will be transcribed verbatim and coded using NVivo. Analysis will draw on elements of grounded  
23 theory, in particular, the constant comparative approach [104] and will remain grounded in the  
24 data. We will use techniques developed through our experience of conducting large scale  
25 ethnographic studies to enable us to manage the large amounts of data generated, and to move  
26 quickly from data to interpretation. These include regular debriefs and the production of  
27 summaries of data by site and across sites, organised by research questions and emerging  
28 themes.  
29  
30  
31

#### 32 **Workstream 4: Co-Design and Piloting of the Reflective Learning Framework & Toolkit**

33  
34  
35 'Co-design' or 'co-production' involves service users and providers working together using a  
36 structured approach to create improvements[105]. Co-design has been used previously in  
37 exploring patient feedback [106]. We will use an adapted version [107] of the British Design  
38 Council's 'double diamond' approach, of 'Discover, Define, Develop and Deliver' in which the  
39 initial problem ('How to promote effective reflection') is subject to two rounds of divergent and  
40 convergent thinking, first to refine the problem, and second to develop solutions. The co-design  
41 workshops will use creative co-production, which has collective making [108] as it's central  
42 approach to ensure meaningful engagement and creative responses from all participants.  
43  
44  
45  
46

47  
48 Workstream 4 will consist of 13 co-design meetings: four plenary workshops for the whole  
49 collaboration held annually, and three local meetings in year 2 for each local project team  
50 conducted on-site at each Trust (nine local meetings in total). Attendees will include patients  
51 and relatives, clinical staff, and the non-executive directors. The co-design elements will be  
52 developed in collaboration with the researchers from Lab4Living, the Art and Design Research  
53 Centre, Sheffield Hallam University. Co-design aims and outputs are shown in Table 1.  
54  
55  
56

57  
58 Following workshop 3, local project teams will be invited to develop behavioural specifications  
59 for embedding a maximum of three interventions into routine clinical activities. Teams will use  
60 COM-B as an analytical tool (figure 2) to identify gaps in reflective practice which can be

addressed through these behavioural specifications. The teams will present their experiences of selecting, specifying and piloting interventions in the final plenary workshop 4.

**TABLE 1: CO-DESIGN MEETINGS**

| Event           | Participants                                                                           | Aims or activity                                                                                                                                           |
|-----------------|----------------------------------------------------------------------------------------|------------------------------------------------------------------------------------------------------------------------------------------------------------|
| Workshop 1      | All project participants, central location                                             | Discuss the background to the project and review or modify the proposed methodology                                                                        |
| Workshop 2      | All project participants, central location                                             | Co-design approach will be introduced to the local project teams                                                                                           |
| Site meetings 1 | Local project team, project core team, design team, meeting at each of the three sites | Describe 'reflective moments' – occasions when an event stimulated personal insight development                                                            |
| Site meetings 2 |                                                                                        | Discuss attitudes to reflection and how habits and preferences shape response to events and the capacity for insight development                           |
| Site meetings 3 |                                                                                        | Discuss reflective opportunities – how reflection can be incorporated in routine activities in the workplace                                               |
| Workshop 3      | All project participants, central location                                             | Structure and content of the toolkit will be provisionally outlined, and a set of candidate prototype interventions (tools and techniques for reflection). |
| Workshop 4      | All project participants, central location                                             | Teams present experience of developing & piloting interventions.                                                                                           |

Toolkit Development: Outputs from each of the 13 co-design meetings will be documented by the ethnographers and members of the core project team and will feed into toolkit development. The members of the core project team will collate their findings from the co-design meetings and cross-reference them with ethnographic findings from site visits to produce short guidance notes and resource materials under the following headings: Aims of the toolkit; What is reflection?; Why reflect?; How to reflect effectively; Reflection in daily practice; Stimulating reflection in others; Evidencing reflection; and Organisational support for reflection. The Reflective Learning Framework and Toolkit will be evaluated locally by the participating units. Staff will be asked to offer their views on the specific interventions. This feedback will be incorporated in the final version.

### **Patient & Public Involvement**

The PEARL project puts patients and relatives at the centre of the research and they were involved at inception in the initial design, contributing as full collaborators. PEARL is a developmental project which uses co-design to develop the reflective learning framework. To develop the framework, patients and relatives from the acute medical units and intensive care

1  
2  
3 units of four hospitals in three Trusts will work together collaboratively in 12 facilitated  
4 workshops as well as being full members of each local project team. They are helping to design  
5 the patient and staff surveys, and have informed decisions about the extent to which PPIs can  
6 contribute to this type of co-design process. They are co-authors in publications and will  
7 participate in dissemination activities.  
8  
9

## 10 DISCUSSION

11  
12

13 Patient experience data demonstrate important opportunities to improve the quality of  
14 healthcare, particularly those relating to attitudes, behaviours and staff-patient relationships.  
15 However, these data are not used optimally by organisations or frontline staff to make  
16 improvements. Reflective learning should hold the key to converting experience into action, but  
17 there is little evidence about how reflection can most effectively be incorporated in routine  
18 clinical practice for individuals and teams.  
19  
20

21  
22 The PEARL project aims to develop a framework and toolkit to support effective reflection in the  
23 workplace. The apparent simplicity of this aim disguises the underlying complexity of the  
24 relationships linking the various theories of reflection, learning and behaviour change, as  
25 demonstrated in the introduction and in figure 1. These theories show that reflective learning –  
26 which has almost achieved the status of received wisdom in medical education – is itself a form  
27 of behaviour subject to multiple influences, summarised in the COM-B model. Individuals and  
28 groups vary in their capacity, opportunity and motivation to reflect, and to do so in a manner  
29 which promotes personal growth. And having reflected effectively, they must then use these  
30 insights to drive changes in behaviours at the ‘sharp end’ of medicine as well as at institutional  
31 level. It is perhaps not surprising that health systems have difficulty using patient and staff  
32 experience data to improve care quality.  
33  
34  
35  
36  
37

38 Most interactions between patients and health care staff are associated with positive  
39 experiences. This is an asset in terms of reflection and behaviour modification, for two reasons.  
40 First, there are many excellent role models available, and a systematic approach for identifying  
41 and learning from them can help others to acquire similar skills. Second, it takes courage and  
42 resilience to cope with the discovery of imperfections, and this may be easier if the setting is  
43 one which prioritises learning from excellence [23].  
44  
45  
46  
47

48 Emotional engagement is important in engaging people’s attention and in promoting empathy,  
49 but not at the price of preventing analytical thinking: the Elaboration Likelihood Model of  
50 Persuasion provides some evidence for the value of analysis over heuristics in sustained change  
51 in attitudes and beliefs [46]. It may be easier to accept and improve deficiencies in technical  
52 skills than in attitudes and behaviours, because technical issues allow us to focus externally on  
53 the tool, while non-technical issues reflect on our inner character and personality, and evidence  
54 of deficiencies is therefore more threatening. Models of reflective learning may help to  
55 ‘externalise’ behaviours, providing enough distance to allow constructive analysis. The process  
56 of self-critiquing may also be made more palatable – that is, enhancing the recipient’s resilience  
57 - by focusing initially on positive aspects of feedback.  
58  
59  
60

1  
2  
3  
4  
5 The PEARL project will gather important insights into the 'black box' of reflective learning. The  
6 framework and toolkit will use patient and staff experience to support workplace-based  
7 effective reflection and improvement during routine clinical practice for individuals and teams.  
8 Our intent in subsequent research is to evaluate the logic model (figure 1) and the toolkit in a  
9 mixed-methods step-wedge cluster randomised trial.  
10  
11

#### 12 **ETHICS:**

13  
14  
15 The PEARL Project has received ethics approval from the London Brent Research Ethics  
16 Committee (REC Ref 16/LO/224). Implied consent will apply to the return of completed  
17 questionnaires. Informed consent will be sought from participants of ethnographic interviews.  
18  
19

#### 20 **FUNDING**

21  
22  
23 PEARL is funded by the NIHR HS&DR programme (Ref 14/156/23).  
24  
25

#### 26 **ACKNOWLEDGEMENTS**

27  
28  
29 The PEARL project team are grateful to the study Steering Committee for their invaluable  
30 support; Prof Rebecca Lawton, Mr Harry Turner, Prof James Neuberger, and Prof Stephen Brett.  
31 Dr Remi Bec and Cheryl Grindell were instrumental in the planning of the codesign workshops.  
32  
33  
34  
35  
36  
37  
38  
39  
40  
41  
42  
43  
44  
45  
46  
47  
48  
49  
50  
51  
52  
53  
54  
55  
56  
57  
58  
59  
60

## REFERENCES

1. Dixon-Woods M, Baker R, Charles K, et al. Culture and behaviour in the English National Health Service: overview of lessons from a large multimethod study. *BMJ Qual Saf*. 2014 Feb;23(2):106-15. doi: 10.1136/bmjqs-2013-001947. [Epub 2013 Sep 9].
2. Sheard L, Marsh C, O'Hara J, et al. The patient feedback response framework—understanding why UK hospital staff find it difficult to make improvements based on patient feedback: a qualitative study. *Social Science & Medicine* 2017;178: 19-27.
3. Mannion R, Davies H. Understanding organisational culture for healthcare quality improvement. *BMJ*. 2018 Nov 28;363:k4907. doi: 10.1136/bmj.k4907.
4. Martin GP, Aveling EL, Campbell A, et al. Making soft intelligence hard: a multi-site qualitative study of challenges relating to voice about safety concerns. *BMJ Qual Saf*. 2018 Sep;27(9):710-717. doi: 10.1136/bmjqs-2017-007579. [Epub 2018 Feb 19]
5. Armstrong N, Brewster L, Tarrant C, et al. Taking the heat or taking the temperature? A qualitative study of a large-scale exercise in seeking to measure for improvement, not blame. *Soc Sci Med*. 2018 Feb;198:157-164. doi: 10.1016/j.socscimed.2017.12.033. [Epub 2018 Jan 2]
6. World Health Organization. The world health report 2000. Health systems: improving performance. WHO 2000.
7. Institute of Medicine. Crossing the quality chasm: a new health system for the 21st century. National Academy Press, 2001.
8. Doyle C, Lennox L, Bell D. A systematic review of evidence on the links between patient experience and clinical safety and effectiveness. *BMJ Open* 2013;3:e001570. doi:10.1136/bmjopen-2012-001570
9. Darzi A. High Quality Care For All. NHS Next Stage Review Final Report. Department of Health 2008.
10. NHS Outcomes Framework, accessed Feb 2019: <https://digital.nhs.uk/data-and-information/publications/ci-hub/nhs-outcomes-framework>
11. Care Quality Commission, accessed Feb 2019: <https://www.cqc.org.uk/file/151928>
12. Care Quality Commission, Adult In-Patient Survey 2017, accessed Feb 2019: <http://www.cqc.org.uk/publications/surveys/adult-inpatient-survey-2016>
13. NHS Friends and Family Test, accessed Feb 2019. <https://www.england.nhs.uk/fft/>
14. NHS Digital, Data on Written Complaints in the NHS, accessed Feb 2019: <https://digital.nhs.uk/data-and-information/publications/statistical/data-on-written-complaints-in-the-nhs>
15. HCAHPS, accessed Feb 2019: <https://www.hcahpsonline.org/>
16. Australian Commission on Safety and Quality in Health Care. National safety and quality health service (NSQHS) standards. Sydney: ACSQHC; 2012.
17. Francis R. Report of the Mid Staffordshire NHS Foundation Trust Public Inquiry. London. The Stationery Office 6 February 2013
18. Gosport Enquiry 2018, accessed Feb 2019: <https://www.gosportpanel.independent.gov.uk/panel-report/>

19. NHS Staff Survey , accessed Feb 2019:  
<http://www.nhsstaffsurveys.com/Page/1056/Home/NHS-Staff-Survey-2018/>
20. Aiken LH, Sermeus W, Van den Heede K, et al. Patient safety, satisfaction, and quality of hospital care: cross sectional surveys of nurses and patients in 12 countries in Europe and the United States. *BMJ*. 2012 Mar 20;344:e1717. doi: 10.1136/bmj.e1717.
21. Flott K, Darzi A, Mayer E. Care pathway and organisational features driving patient experience: statistical analysis of large NHS datasets. *BMJ Open* 2018;8:e020411. doi: 10.1136/bmjopen-2017-020411
22. Lawton R, O'hara J K, Sheard L, et al. Can staff and patient perspectives on hospital safety predict harm-free care? An analysis of staff and patient survey data and routinely collected outcomes. *BMJ Qual Saf*, 2015;24(6), 369-376.
23. Learning from Excellence, accessed Feb 2019: <https://learningfromexcellence.com/>
24. Burt J, Newbould J, Abel G et al. Investigating the meaning of 'good' or 'very good' patient evaluations of care in English general practice: a mixed methods study. *BMJ Open*. 2017 Mar 2;7(3):e014718.
25. Healthwatch 2014. Suffering in silence: Listening to consumer experiences of the health and social care complaints system. *Healthwatch*, October 2014
26. Gallan AS, Girju M, Girju R. Perfect ratings with negative comments: Learning from contradictory patient survey responses. *Patient Experience Journal* 2017; 4(3): 15-28.
27. O'Hara JK, Reynolds C, Moore S, et al. What can patients tell us about the quality and safety of hospital care? Findings from a UK multicentre survey study. *BMJ Qual Saf*. 2018 Sep;27(9):673-682. doi: 10.1136/bmjqs-2017-006974. [Epub 2018 Mar 15]
28. Reader TW, Gillespie A, Roberts J. Patient complaints in healthcare systems: a systematic review and coding taxonomy. *BMJ Qual Saf* 2014;23:678–89.
29. NHS Staff survey 2017, accessed Feb 2019:  
<http://www.nhsstaffsurveys.com/Page/1064/Latest-Results/2017-Results/>
30. Flott KM, Graham C, Darzi A, et al. Can we use patient-reported feedback to drive change? The challenges of using patient-reported feedback and how they might be addressed. *BMJ Qual Saf* 2016; 26(6): 502 to 507
31. Scott DAH, Grant SM. A meta-ethnography of the facilitators and barriers to successful implementation of patient complaints processes in health-care settings. *Health Expect*. 2018 Apr;21(2):508-517.
32. DeCourcy A, West E, Barron D. The National Adult Inpatient Survey conducted in the English National Health Service from 2002 to 2009: how have the data been used and what do we know as a result? *BMC Health Serv Res* 2012;12:71.
33. Lee R, Baeza JI, Fulop NJ. The use of patient feedback by hospital boards of directors: a qualitative study of two NHS hospitals in England. *BMJ Qual Saf* 2018;27:103-109.
34. Sheard L, Peacock R, Marsh C et al. What's the problem with patient experience feedback? A macro and micro understanding, based on findings from a three-site UK qualitative study. *Health Expectations*, 22 (1). pp. 46-53.
35. Gleeson H, Calderon A, Swami V, et al. Systematic review of approaches to using patient experience data for quality improvement in healthcare settings. *BMJ Open*. 2016 Aug 16;6(8):e011907. doi: 10.1136/bmjopen-2016-011907.



- 1
  - 2
  - 3
  - 4
  - 5
  - 6
  - 7
  - 8
  - 9
  - 10
  - 11
  - 12
  - 13
  - 14
  - 15
  - 16
  - 17
  - 18
  - 19
  - 20
  - 21
  - 22
  - 23
  - 24
  - 25
  - 26
  - 27
  - 28
  - 29
  - 30
  - 31
  - 32
  - 33
  - 34
  - 35
  - 36
  - 37
  - 38
  - 39
  - 40
  - 41
  - 42
  - 43
  - 44
  - 45
  - 46
  - 47
  - 48
  - 49
  - 50
  - 51
  - 52
  - 53
  - 54
  - 55
  - 56
  - 57
  - 58
  - 59
  - 60
36. Sheard L, Marsh C, O'Hara J, et al. Exploring how ward staff engage with the implementation of a patient safety intervention: a UK-based qualitative process evaluation. *BMJ Open*. 2017 Jul 13;7(7):e014558. doi: 10.1136/bmjopen-2016-014558.
37. Freedom To Speak Up Guardians, accessed Feb 2019: <https://www.cqc.org.uk/national-guardians-office/content/national-guardians-office>
38. The Behavioural Insights Team. Cabinet Office, accessed Feb 2019: <https://www.behaviouralinsights.co.uk/>
39. Michie S, Richardson M, Johnston M, et al. The behavior change technique taxonomy (v1) of 93 hierarchically clustered techniques: building an international consensus for the reporting of behavior change interventions. *Ann Behav Med*. 2013 Aug;46(1):81-95. doi: 10.1007/s12160-013-9486-6.
40. Michie S, West R, Sheals K, et al. Evaluating the effectiveness of behavior change techniques in health-related behavior: a scoping review of methods used. *Translational Behavioral Medicine* 2018; 8(2): 212–224, <https://doi.org/10.1093/tbm/ibx019>
41. Johnson MJ, May CR. Promoting professional behaviour change in healthcare: what interventions work, and why? A theory-led overview of systematic reviews *BMJ Open* 2015; 5(9): e008592. doi: 10.1136/bmjopen-2015-008592
42. Chauhan BF, Jeyaraman MM, Mann AS, et al. Behavior change interventions and policies influencing primary healthcare professionals' practice—an overview of reviews. *Implement Sci*. 2017;12:3. doi: 10.1186/s13012-016-0538-8.
43. Michie S, van Stralen MM, West R. The behaviour change wheel: a new method for characterising and designing behaviour change interventions. *Implement Sci*. 2011;6:42.
44. Kahneman D. Thinking, fast and slow. Penguin 2012.
45. Petty R E, Cacioppo J T. The effects of involvement on responses to argument quantity and quality: Central and peripheral routes to persuasion. *Journal of Personality and Social Psychology*, 1984;46(1), 69-81. <http://dx.doi.org/10.1037/0022-3514.46.1.69>
46. O'Keefe D. The Elaboration Likelihood Model. In Dillard JP and Shen L. The SAGE Handbook of Persuasion: Developments in Theory and Practice. SAGE publications 2012.
47. Dolan P, Hallsworth M, Halpern D, et al. Influencing behaviour: The mindspace way. *Journal of Economic Psychology* 2012; 33(1): 264-277.
48. Kolb D A, Fry R (1975) Toward an applied theory of experiential learning. in C. Cooper (ed.) Theories of Group Process, London: John Wiley
49. Schön D A (1983). The reflective practitioner: How professionals think in action. New York: Basic Books.
50. Pedler M, Burgoyne J, Boydell T (1991, rev 1996) The Learning Company. A strategy for sustainable development, London: McGraw-Hill.
51. Mezirow J. 1981. A critical theory of adult learning and education. *Adult Educ* 32(1):3–24.
52. Sandars J. The use of reflection in medical education: AMEE Guide No. 44. *Med Teach*. 2009 Aug;31(8):685-95.
53. Nonaka I, von Krogh G. Tacit Knowledge and Knowledge Conversion: Controversy and Advancement in Organizational Knowledge Creation Theory. *Organization Science* 2009; 20(3): 635-52.

- 1  
2  
3  
4  
5  
6  
7  
8  
9  
10  
11  
12  
13  
14  
15  
16  
17  
18  
19  
20  
21  
22  
23  
24  
25  
26  
27  
28  
29  
30  
31  
32  
33  
34  
35  
36  
37  
38  
39  
40  
41  
42  
43  
44  
45  
46  
47  
48  
49  
50  
51  
52  
53  
54  
55  
56  
57  
58  
59  
60
54. Bandura A . Self-efficacy: Toward a unifying theory of behavioral change. *Psychological Review*, 1977;84(2), 191-215. <http://dx.doi.org/10.1037/0033-295X.84.2.191>
  55. Aronson L. Twelve tips for teaching reflection at all levels of medical education. *Med Teach*. 2011;33(3):200-5. doi: 10.3109/0142159X.2010.507714. [Epub 2010 Sep 27]
  56. Broadwell MM. Teaching for learning (XVI). *The Gospel Guardian*, 20 February 1969. [http://www.wordsfityspoken.org/gospel\\_guardian/v20/v20n41p1-3a.html](http://www.wordsfityspoken.org/gospel_guardian/v20/v20n41p1-3a.html)
  57. Dewey, J. (1933). *How we think: A restatement of the relation of reflective thinking to the educative process*. Boston: D.C. Heath and Company.
  58. General Medical Council. *The Reflective Practitioner. Guidance for doctors and medical students*. Academy of Medical Royal Colleges, the UK Conference of Postgraduate Medical Deans, the General Medical Council, and the Medical Schools Council. GMC, London 2018. <https://www.gmc-uk.org/education/standards-guidance-and-curricula/guidance/the-reflective-practitioner---guidance-for-doctors-and-medical-students>
  59. Winkel AF, Yingling S, Jones AA, et al. Reflection as a Learning Tool in Graduate Medical Education: A Systematic Review. *J Grad Med Educ*. 2017 Aug;9(4):430-439. doi: 10.4300/JGME-D-16-00500.1.
  60. Ferguson J, Wakeling J, Bowie P. Factors influencing the effectiveness of multisource feedback in improving the professional practice of medical doctors: a systematic review. *BMC Med Educ*. 2014; 14: 76.
  61. Boiko O, Campbell JL, Elmore N, et al. The role of patient experience surveys in quality assurance and improvement: a focus group study in English general practice. *Health Expect*. 2015 Dec;18(6):1982-94.
  62. Kappes A, Faber NS, Kahane G, et al. Concern for Others Leads to Vicarious Optimism. *Psychol Sci*. 2018 Mar;29(3):379-389. doi: 10.1177/0956797617737129. [Epub 2018 Jan 30]
  63. Farrington C, Burt J, Boiko O, et al. Doctors' engagements with patient experience surveys in primary and secondary care: a qualitative study. *Health Expectations* 2017;20(3):385-394. doi:10.1111/hex.12465.
  64. Garrett N, González-Garzón AM, Foulkes L, et al. Updating Beliefs under Perceived Threat. *J Neurosci*. 2018 Sep 5; 38(36): 7901–7911. doi: 10.1523/JNEUROSCI.0716-18.2018
  65. Ehrlinger J, Johnson K, Banner M, et al. Why the Unskilled Are Unaware: Further Explorations of (Absent) Self-Insight Among the Incompetent. *Organ Behav Hum Decis Process*. 2008 Jan 1;105(1):98-121.
  66. The Bawa-Garba case. *BMJ*, accessed Feb 2019: <https://www.bmj.com/bawa-garba>
  67. Sanson-Fisher R, Hobden B, Waller A, et al. Methodological quality of teaching communication skills to undergraduate medical students: a mapping review. *BMC Med Educ*. 2018 Jun 27;18(1):151.
  68. Papageorgiou A, Loke Y K, Fomage M. Communication skills training for mental health professionals working with people with severe mental illness. *Cochrane Database Syst Rev*. 2017 Jun 13;6:CD010006.



- 1
  - 2
  - 3
  - 4
  - 5
  - 6
  - 7
  - 8
  - 9
  - 10
  - 11
  - 12
  - 13
  - 14
  - 15
  - 16
  - 17
  - 18
  - 19
  - 20
  - 21
  - 22
  - 23
  - 24
  - 25
  - 26
  - 27
  - 28
  - 29
  - 30
  - 31
  - 32
  - 33
  - 34
  - 35
  - 36
  - 37
  - 38
  - 39
  - 40
  - 41
  - 42
  - 43
  - 44
  - 45
  - 46
  - 47
  - 48
  - 49
  - 50
  - 51
  - 52
  - 53
  - 54
  - 55
  - 56
  - 57
  - 58
  - 59
  - 60
69. Ditton-Phare P, Loughland C, Duvivier R, et al. Communication skills in the training of psychiatrists: A systematic review of current approaches. *Aust N Z J Psychiatry*. 2017 Jul;51(7):675-692.
70. Moore PM, Rivera Mercado S, Grez Artigues M, et al. Communication skills training for healthcare professionals working with people who have cancer. *Cochrane Database Syst Rev*. 2013 Mar 28;(3):CD003751.
71. Brighton LJ, Koffman J, Hawkins A, et al. A Systematic Review of End-of-Life Care Communication Skills Training for Generalist Palliative Care Providers: Research Quality and Reporting Guidance. *J Pain Symptom Manage*. 2017 Sep;54(3):417-425.
72. Oladeru O A, Hamadu M, Cleary P D, et al. House Staff Communication Training and Patient Experience Scores. *J Patient Exp*. 2017 Mar; 4(1): 28–36. Published online 2017 Feb 20
73. Chung H O, Oczkowski S J, Hanvey L, et al. Educational interventions to train healthcare professionals in end-of-life communication: a systematic review and meta-analysis. *BMC Med Educ*. 2016; 16: 131
74. Curtis J R, Back A L, Ford D W, et al. Effect of communication skills training for residents and nurse practitioners on quality of communication with patients with serious illness: a randomized trial. *JAMA*. 2013 Dec 4;310(21):2271-81
75. Haynes A B, Edmondson L, Lipsitz S R, et al. Mortality Trends After a Voluntary Checklist-based Surgical Safety Collaborative. *Ann Surg*. 2017 Dec;266(6):923-929.
76. Derksen F, Bensing J, Lagro-Janssen A. Effectiveness of empathy in general practice: a systematic review. *Br J Gen Pract*. 2013 Jan;63(606):e76-84.
77. Kelm Z, Womer J, Walter J K, et al. Interventions to cultivate physician empathy: a systematic review. *BMC Med Educ*. 2014 Oct 14;14:219.
78. Dwamena F, Holmes-Rovner M, Gaulden C M, et al. Interventions for providers to promote a patient-centred approach in clinical consultations. *Cochrane Database Syst Rev*. 2012 Dec 12;12:CD003267.
79. Mazzi M A, Rimondini M, Deveugele M, et al. What do people appreciate in physicians' communication? An international study with focus groups using videotaped medical consultations. *Health Expect* 2015 Oct;18(5):1215-26.
80. Agledahl K M, Gulbrandsen P, Forde R, et al. Courteous but not curious: how doctors' politeness masks their existential neglect. A qualitative study of video-recorded patient consultations. *J Med Ethics*. 2011 Nov;37(11):650-4.
81. Beach M C, Sugarman J, Johnson R L, et al. Do patients treated with dignity report higher satisfaction, adherence, and receipt of preventive care? *Ann Fam Med*. 2005 Jul-Aug;3(4):331-8.
82. Laganá L, Gavrilova B A, Carter D B, et al. A Randomized Controlled Study on the Effects of a Documentary on Students' Empathy and Attitudes towards Older Adults. *Psychol Cogn Sci*. 2017;3(3):79-88.
83. Nelson S W, Germann C A, MacVane C Z, et al. Intern as Patient: A Patient Experience Simulation to Cultivate Empathy in Emergency Medicine Residents. *West J Emerg Med*. 2018 Jan;19(1):41-48

- 1  
2  
3  
4  
5  
6  
7  
8  
9  
10  
11  
12  
13  
14  
15  
16  
17  
18  
19  
20  
21  
22  
23  
24  
25  
26  
27  
28  
29  
30  
31  
32  
33  
34  
35  
36  
37  
38  
39  
40  
41  
42  
43  
44  
45  
46  
47  
48  
49  
50  
51  
52  
53  
54  
55  
56  
57  
58  
59  
60
84. Pollak K I, Alexander S C, Tulsy J A, et al. Physician empathy and listening: associations with patient satisfaction and autonomy. *J Am Board Fam Med*. 2011 Nov-Dec;24(6):665-72.
85. Buckman R, Tulsy J A, Rodin G. Empathic responses in clinical practice: intuition or tuition? *CMAJ*. 2011 Mar 22;183(5):569-71
86. Amutio-Kareaga A, Garcia-Campayo J, Delgado L C, et al. Improving Communication between Physicians and Their Patients through Mindfulness and Compassion-Based Strategies: A Narrative Review. *J Clin Med*. 2017 Mar 17;6(3).
87. Kiosses V N, Karathanos V T, Tatsioni A. Empathy promoting interventions for health professionals: a systematic review of RCTs. *Journal of Compassionate Health Care* 2016 3:7
88. Empathy: The Human Connection to Patient Care, accessed Feb 2019: [https://www.youtube.com/watch?v=cDDWvj\\_q-o8](https://www.youtube.com/watch?v=cDDWvj_q-o8)
89. TEDxMaastricht - Fred Lee - "Patient Satisfaction or Patient Experience?" accessed Feb 2019: <https://www.youtube.com/watch?v=tylvc9dY400>
90. Say This, Not That: Patient Experience Video. Eastern Idaho Regional Medical Center, accessed Feb 2019: <https://www.youtube.com/watch?v=r842Ylpa-nQ>
91. Moore G F, Audrey S, Barker M, et al. Process evaluation of complex interventions: Medical Research Council guidance. *BMJ* 2015; 350:h1258. doi: 10.1136/bmj.h1258.
92. Wenger E. Communities of Practice: A brief introduction. STEP Leadership Workshop, University of Oregon, October, 2011. <https://scholarsbank.uoregon.edu/xmlui/handle/1794/11736>
93. Li L C, Grimshaw J M, Nielsen C, et al. Evolution of Wenger's concept of community of practice. *Implement Sci* 2009;4:11 doi:10.1186/1748-5908-4-11
94. Dixon-Woods M, Leslie M, Bion J, et al. What Counts? An Ethnographic Study of Infection Data Reported to a Patient Safety Program. *Milbank Quarterly* 2012; 90(3): 548–591
95. Dixon-Woods M, Leslie M, Tarrant C, et al. Explaining Matching Michigan: an ethnographic study of a patient safety program. *Implementation Science* 2013, 8:70 doi:10.1186/1748-5908-8-70.
96. Wall R J, Engelberg R A, Downey L, et al. Refinement, scoring and validation of the Family Satisfaction in Intensive Care Unit (FS-ICU) survey. *Critical Care Medicine* 2007; Vol/is 35/1 p271-279
97. Wright S E, Walmsley E, Harvey S E, et al. Family-Reported Experiences Evaluation (FREE) study: a mixed-methods study to evaluate families' satisfaction with adult critical care services in the NHS. *Health Services and Delivery Research* 2015; 3(45).
98. Harrison D A, Ferrando-Vivas P, Wright S E, et al. Family-Reported Experiences Evaluation Study Investigators. Psychometric assessment of the Family Satisfaction in the Intensive Care Unit questionnaire in the United Kingdom. *J Crit Care*. 2017 Apr;38:346-350. doi: 10.1016/j.jcrc.2016.10.023. [Epub 2016 Nov 5]
99. NHS Staff Friends & Family Test, accessed Feb 2019: <https://www.england.nhs.uk/fft/staff-fft/>

- 1  
2  
3  
4  
5  
6  
7  
8  
9  
10  
11  
12  
13  
14  
15  
16  
17  
18  
19  
20  
21  
22  
23  
24  
25  
26  
27  
28  
29  
30  
31  
32  
33  
34  
35  
36  
37  
38  
39  
40  
41  
42  
43  
44  
45  
46  
47  
48  
49  
50  
51  
52  
53  
54  
55  
56  
57  
58  
59  
60
100. Hospital Survey on Patient Safety Culture, accessed Feb 2019:  
<https://www.ahrq.gov/sites/default/files/wysiwyg/professionals/quality-patient-safety/patientsafetyculture/hospital/resources/hospscanform.pdf>
101. Teamwork and Safety Climate Survey, accessed Feb 2019:  
<https://med.uth.edu/chqs/files/2012/05/Survey-SAQ-Teamwork-Safety-Climate-.pdf>
102. General Medical Council Trainee Survey, accessed Feb 2019: <https://www.gmc-uk.org/education/how-we-quality-assure/national-training-surveys/national-training-surveys---doctors-in-training>
103. Grant A M, Franklin J, Langford P. The Self-Reflection and Insight Scale: A New Measure of Private Self-Consciousness. *Social Behaviour and Personality* 2002, 30(8), 821-836.
104. Glaser B, Strauss A. 1967, The discovery of grounded theory, Aldine Publishing Company, Hawthorne, NY.
105. Batalden M, Batalden P, Margolis P, et al. Coproduction of healthcare service. *BMJ Qual Saf.* 2016 Jul;25(7):509-17. doi: 10.1136/bmjqs-2015-004315.
106. Scott J, Heavey E, Waring J, et al. Healthcare professional and patient codesign and validation of a mechanism for service users to feedback patient safety experiences following a care transfer: a qualitative study. *BMJ Open.* 2016 Jul 12;6(7):e011222. doi: 10.1136/bmjopen-2016-011222.
107. Better Services by Design, accessed Feb 2019 , <http://www.bsbd.org.uk/double-diamond-design-process/>
108. Langley J , Wolstenholme D, Cooke J. 2018. "Collective Making' as Knowledge Mobilisation: The Contribution of Participatory Design in the Co-Creation of Knowledge in Healthcare." *BMC Health Services Research* 18 (1). BMC Health Services Research: 585. doi:10.1186/s12913-018-3397-y.

CONCEPTUAL MODEL OF HOW FEEDBACK MAY BE USED TO PROMOTE EFFECTIVE REFLECTION, LEARNING, & OPTIMAL CARE

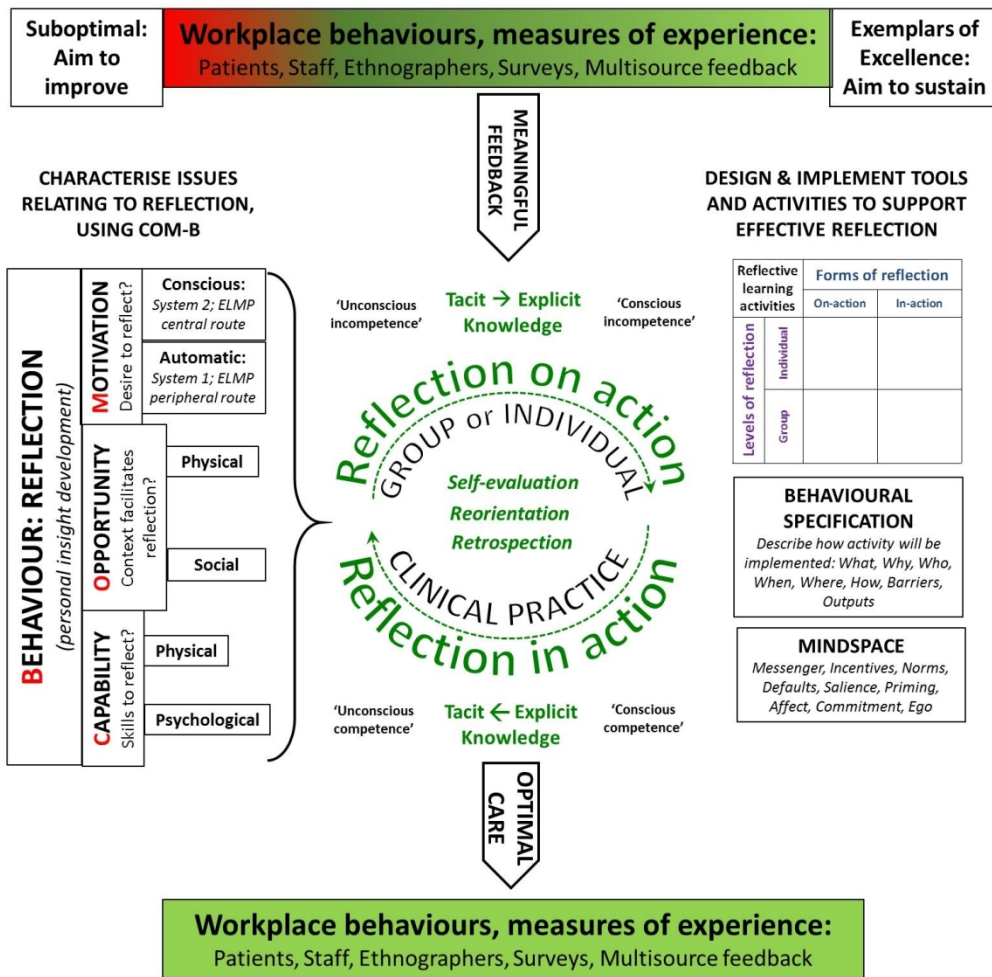

Figure 1: Conceptual model linking theories of behaviour change to those of reflective learning

263x291mm (150 x 150 DPI)

1  
2  
3  
4  
5  
6  
7  
8  
9  
10  
11  
12  
13  
14  
15  
16  
17  
18  
19  
20  
21  
22  
23  
24  
25  
26  
27  
28  
29  
30  
31  
32  
33  
34  
35  
36  
37  
38  
39  
40  
41  
42  
43  
44  
45  
46  
47  
48  
49  
50  
51  
52  
53  
54  
55  
56  
57  
58  
59  
60

### COM-B Diagnostic Framework for Reflection

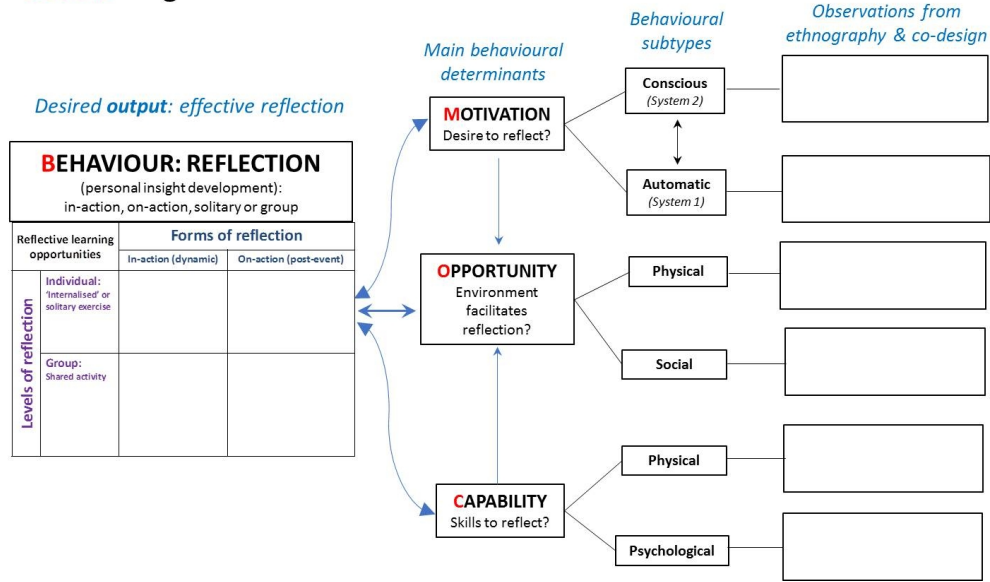

Figure 2: PEARL diagnostic framework using the COM-B model

239x149mm (150 x 150 DPI)

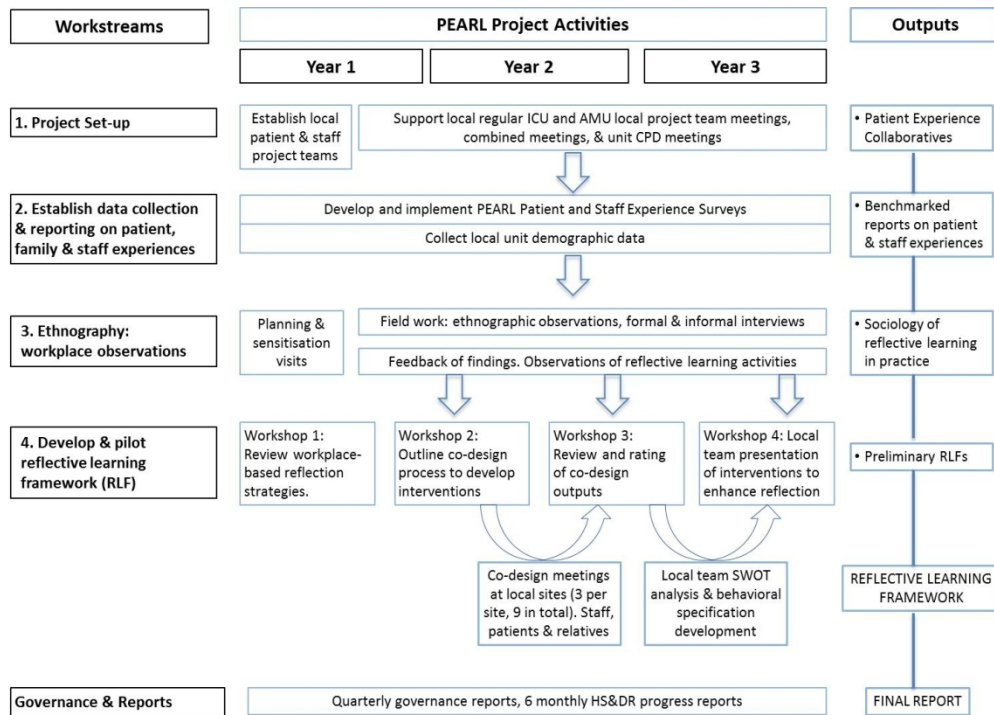

Figure 3: PEARL Project Gantt Chart

252x180mm (150 x 150 DPI)

# BMJ Open

## PATIENT EXPERIENCE AND REFLECTIVE LEARNING (PEARL): A MIXED METHODS PROTOCOL FOR STAFF INSIGHT DEVELOPMENT IN ACUTE AND INTENSIVE CARE MEDICINE

|                                 |                                                                                                                                                                                                                                                                                                                                                                                                                                                                                                                                                                                                                                                                                                                                                                                                                                                                                                                                                                                                                                                                                                                                                                                                                                                                                                                                                                                                                                                                                                                                                                                                                                                                                                                               |
|---------------------------------|-------------------------------------------------------------------------------------------------------------------------------------------------------------------------------------------------------------------------------------------------------------------------------------------------------------------------------------------------------------------------------------------------------------------------------------------------------------------------------------------------------------------------------------------------------------------------------------------------------------------------------------------------------------------------------------------------------------------------------------------------------------------------------------------------------------------------------------------------------------------------------------------------------------------------------------------------------------------------------------------------------------------------------------------------------------------------------------------------------------------------------------------------------------------------------------------------------------------------------------------------------------------------------------------------------------------------------------------------------------------------------------------------------------------------------------------------------------------------------------------------------------------------------------------------------------------------------------------------------------------------------------------------------------------------------------------------------------------------------|
| Journal:                        | <i>BMJ Open</i>                                                                                                                                                                                                                                                                                                                                                                                                                                                                                                                                                                                                                                                                                                                                                                                                                                                                                                                                                                                                                                                                                                                                                                                                                                                                                                                                                                                                                                                                                                                                                                                                                                                                                                               |
| Manuscript ID                   | bmjopen-2019-030679.R1                                                                                                                                                                                                                                                                                                                                                                                                                                                                                                                                                                                                                                                                                                                                                                                                                                                                                                                                                                                                                                                                                                                                                                                                                                                                                                                                                                                                                                                                                                                                                                                                                                                                                                        |
| Article Type:                   | Protocol                                                                                                                                                                                                                                                                                                                                                                                                                                                                                                                                                                                                                                                                                                                                                                                                                                                                                                                                                                                                                                                                                                                                                                                                                                                                                                                                                                                                                                                                                                                                                                                                                                                                                                                      |
| Date Submitted by the Author:   | 13-Jun-2019                                                                                                                                                                                                                                                                                                                                                                                                                                                                                                                                                                                                                                                                                                                                                                                                                                                                                                                                                                                                                                                                                                                                                                                                                                                                                                                                                                                                                                                                                                                                                                                                                                                                                                                   |
| Complete List of Authors:       | Brookes, Olivia; University Hospitals Birmingham NHS Foundation Trust, Research, Development & Innovation<br>Brown, Celia; The University of Warwick, Warwick Medical School (WMS)<br>Tarrant, Carolyn; University of Leicester<br>Archer, Julian; Royal Australasian College of Surgeons; Peninsula College of Medicine and Dentistry<br>Buckley, Duncan<br>Buckley, Lisa<br>Clement, Ian; Newcastle Upon Tyne Hospitals NHS Foundation Trust<br>Evison, Felicity; University Hospitals Birmingham NHS Foundation Trust, Department of Health Informatics<br>Gao, Fang; University of Birmingham, Institute of Inflammation and Ageing, College of Medical and Dental Sciences; Heart of England NHS Foundation Trust, Academic Department of Anaesthesia, Critical Care, Pain and Resuscitation<br>Gibbins, Chris; Newcastle Upon Tyne Hospitals NHS Foundation Trust<br>Hayton, Emma; University Hospitals Birmingham NHS Foundation Trust<br>Jones, Jennifer; University of Leicester<br>Lilford, Richard; University of Warwick, Division of Health and Population Sciences<br>Mullhi, Randeep; University Hospitals Birmingham NHS Foundation Trust<br>Packer, Greg; University Hospitals Birmingham NHS Foundation Trust<br>Perkins, Gavin; University of Warwick, Clinical Trials Unit<br>Shelton, Jonathan; Newcastle Upon Tyne Hospitals NHS Foundation Trust<br>Snelson, Catherine; University Hospital Birmingham, Critical Care<br>Sullivan, Paul; Imperial College, CLAHRC<br>Vlaev, Ivo; Warwick Business School,<br>Wolstenholme, Daniel; NIHR CLAHRC Yorkshire and Humber,<br>Wright, Stephen; Newcastle upon Tyne Hospitals, Anaesthesia<br>Bion, Julian; University of Birmingham, Intensive Care Medicine |
| <b>Primary Subject Heading</b>: | Health services research                                                                                                                                                                                                                                                                                                                                                                                                                                                                                                                                                                                                                                                                                                                                                                                                                                                                                                                                                                                                                                                                                                                                                                                                                                                                                                                                                                                                                                                                                                                                                                                                                                                                                                      |
| Secondary Subject Heading:      | Communication, Intensive care, Medical education and training, Qualitative research                                                                                                                                                                                                                                                                                                                                                                                                                                                                                                                                                                                                                                                                                                                                                                                                                                                                                                                                                                                                                                                                                                                                                                                                                                                                                                                                                                                                                                                                                                                                                                                                                                           |
| Keywords:                       | MEDICAL EDUCATION & TRAINING, QUALITATIVE RESEARCH, Quality in                                                                                                                                                                                                                                                                                                                                                                                                                                                                                                                                                                                                                                                                                                                                                                                                                                                                                                                                                                                                                                                                                                                                                                                                                                                                                                                                                                                                                                                                                                                                                                                                                                                                |



1  
2  
3  
4  
5  
6  
7  
8  
9  
10  
11  
12  
13  
14  
15  
16  
17  
18  
19  
20  
21  
22  
23  
24  
25  
26  
27  
28  
29  
30  
31  
32  
33  
34  
35  
36  
37  
38  
39  
40  
41  
42  
43  
44  
45  
46  
47  
48  
49  
50  
51  
52  
53  
54  
55  
56  
57  
58  
59  
60

|  |                                                           |
|--|-----------------------------------------------------------|
|  | health care < HEALTH SERVICES ADMINISTRATION & MANAGEMENT |
|  |                                                           |

SCHOLARONE™  
Manuscripts



1  
2  
3 **PATIENT EXPERIENCE AND REFLECTIVE LEARNING (PEARL): A MIXED METHODS PROTOCOL**  
4 **FOR STAFF INSIGHT DEVELOPMENT IN ACUTE AND INTENSIVE CARE MEDICINE**  
5  
6

7 **AUTHORS**  
8

9 Corresponding author: Olivia Brookes  
10 University Hospitals Birmingham NHS Foundation Trust  
11 Research, Development & Innovation  
12 Office G15a Ground Floor, East Block, Heritage Building  
13 Mindelsohn Way,  
14 Birmingham, UK,  
15 B15 2PR  
16 Email: [Olivia.Brookes@uhb.nhs.uk](mailto:Olivia.Brookes@uhb.nhs.uk)  
17 Tel: 0121 3714205  
18  
19

20  
21 Dr Celia Brown  
22 Population Evidence and Technologies, University of Warwick, Warwick, UK  
23

24  
25 Dr Carolyn Tarrant  
26 Social Science Applied to Healthcare Improvement Research (SAPPHIRE) Group, University of Leicester,  
27 Leicester, UK  
28

29  
30 Prof Julian Archer  
31 Royal Australasian College of Surgeons, Melbourne, Australia  
32

33  
34 Mr Duncan Buckley  
35 Patient & Public Involvement Representative, Birmingham, UK  
36

37  
38 Mrs Lisa Marie Buckley  
39 Patient & Public Involvement Representative, Birmingham, UK  
40

41  
42 Dr Ian Clement  
43 Critical Care, Newcastle upon Tyne NHS Foundation Trust, Newcastle, UK  
44

45  
46 Felicity Evison  
47 Informatics Department, University Hospitals Birmingham NHS Foundation Trust, Birmingham, UK  
48

49  
50 Prof Fang Gao Smith  
51 Institute of Inflammation & Ageing, University of Birmingham, Birmingham, UK  
52

53  
54 Dr Chris Gibbins  
55 Acute Medicine, Newcastle upon Tyne NHS Foundation Trust, Newcastle, UK  
56

57  
58 Dr Emma Hayton  
59 Acute Medicine, University Hospitals Birmingham NHS Foundation Trust, Birmingham, UK  
60

61  
62 Dr Jennifer Jones  
63 Social Science Applied to Healthcare Improvement Research (SAPPHIRE) Group, University of Leicester,  
64 Leicester, UK  
65  
66

1  
2  
3  
4 Prof Richard Lilford  
5 Applied Health Research & Delivery, University of Warwick, Warwick, UK  
6  
7

8 Dr Randeep Mulla  
9 Critical Care, University Hospitals Birmingham NHS Foundation Trust, Birmingham, UK  
10

11 Dr Greg Packer  
12 Critical Care, University Hospitals Birmingham NHS Foundation Trust, Birmingham, UK  
13  
14

15 Dr Gavin Perkins  
16 Critical Care Medicine, University of Warwick, Warwick, UK  
17  
18

19 Dr Jonathan Shelton  
20 Critical Care, Newcastle upon Tyne NHS Foundation Trust, Newcastle, UK  
21

22 Dr Catherine Snelson  
23 Critical Care and Acute Medicine, University Hospitals Birmingham NHS Foundation Trust, Birmingham, UK  
24  
25

26 Dr Paul Sullivan  
27 Acute Medicine, Chelsea and Westminster NHS Trust, London, UK  
28  
29

30 Prof Ivo Vlaev  
31 Behavioural Science, University of Warwick, Warwick, UK  
32

33 Daniel Wolstenholme  
34 NIHR CLAHRC Yorkshire and Humber, Sheffield, UK  
35  
36

37 Dr Stephen Wright  
38 Critical Care, Newcastle upon Tyne NHS Foundation Trust, Newcastle, UK  
39

40 Prof Julian Bion  
41 Anaesthesia & Critical Care, University of Birmingham, Birmingham, UK  
42  
43  
44  
45

46 **Main paper current word count (excl. abstract, acknowledgements & references): 4686 words**  
47  
48  
49  
50  
51  
52  
53  
54  
55  
56  
57  
58  
59  
60

## ABSTRACT

**Introduction:** Patient and staff experiences are strongly influenced by attitudes and behaviours, and provide important insights into care quality. Patient and staff feedback could be used more effectively to enhance behaviours and improve care through systematic integration with techniques for reflective learning. We aim to develop a reflective learning framework and toolkit for healthcare staff to improve patient, family and staff experience.

**Methods & Analysis:** Local project teams including staff and patients from the Acute Medical Units (AMUs) and Intensive Care Units (ICUs) of three NHS Trusts will implement two experience surveys derived from existing instruments: a continuous patient and relative survey; and an annual staff survey. Survey data will be supplemented by ethnographic interviews and observations in the workplace to evaluate barriers to and facilitators of reflective learning.

Using facilitated iterative co-design, local project teams will supplement survey data with their experiences of health care to identify events, actions, activities and interventions which promote personal insight and empathy through reflective learning. Outputs will be collated by the central project team to develop a reflective learning framework and toolkit which will be fed back to the local groups for review, refinement, and piloting. The development process will be mapped to a conceptual theory of reflective learning which combines psychological and pedagogical theories of learning, alongside theories of behaviour change based on COM-B (Capability, Opportunity and Motivation influencing Behaviour). The output will be a locally-adaptable workplace-based toolkit providing guidance on using reflective learning to incorporate patient and staff experience in routine clinical activities.

**Ethics & dissemination:** The PEARL Project has received ethics approval from the London Brent Research Ethics Committee (REC Ref 16/LO/224). We propose a national cluster randomised step-wedge trial of the toolkit developed for large-scale evaluation of impact on patient outcomes.

**Abstract word count (excl. key words): 290 words**

**Key words:** behaviour change, empathy, medical care, patient experience, quality improvement, reflective learning, staff experience

**ARTICLE SUMMARY: STRENGTHS AND LIMITATIONS OF THIS STUDY**

- PEARL links together theories of reflection and learning with those of behaviour change (COM-B) in a novel framework.
- Information from patient and staff surveys will provide insights into barriers to and facilitators of reflective and empathic behaviours.
- Observations by ethnographers will provide information about the capability, opportunity and motivation of staff to reflect effectively.
- Using co-design techniques, patients, relatives, and clinical staff will develop workplace-based interventions for stimulating reflection.
- To determine efficacy, the reflective learning toolkit will require testing subsequently in a prospective cluster-randomised clinical trial.

For peer review only

## INTRODUCTION

Patient and staff experiences provide important insights into care quality, but health systems have difficulty using these experiences to improve care, particularly those related to attitudes, behaviours and culture [1-5]. Reflective learning underpins approaches to improving non-technical skills, but the processes by which experiences are translated into reflection, and reflection into behavioural change are not well understood. We present a protocol for developing a toolkit to help frontline staff use patient and staff experiences to promote reflective learning, defined as an experiential process of personal insight development, in which one's own and others' experiences produce changes in behaviours.

### **1: Patient and staff experiences offer important insights into healthcare quality.**

Patient and staff experiences offer important insights into the quality of healthcare which complement organisational-level data on processes and outcomes [6-8]. Patient experience is an explicit outcome measure in the UK National Health Service (NHS) [9-10], and in the regulation of care quality [11]. All NHS Trusts are required to collect patient experience data through surveys [12, 13] and are available through patient complaints [14]. In the USA patients are surveyed through the Hospital Consumer Assessment of Healthcare Providers and Systems [15] while in Australia health organisations are required to involve consumers in accreditation processes [16].

Staff experience also provides insights into care quality: earlier action on staff concerns could have mitigated failings in care [17-18]. The NHS staff survey has been conducted annually since 2003 [19]. Patients and staff appear to share complementary insights into care quality: patient satisfaction is higher in hospitals in which nurses also reported better care quality [20, 21]. Patient and staff perceptions appear to offer both overlapping and unique insights into safety in hospital [22].

### **2: Patient and staff experience is strongly influenced by staff attitudes and behaviours.**

The NHS National Inpatient Survey asks respondents to rate their overall experience on a scale of zero ('very poor') to 10 ('very good'). In 2017, 50% of respondents rated their experience as 9 or above [12]. This indicates that there are substantial opportunities within the health system for 'learning from excellence' [23]. However, 'good' ratings by patients (as opposed to 'very good') may also disguise important opportunities for improvement [24]. A survey by Healthwatch England suggests that half of those experiencing substandard care do not report it [25]. Patients who respond to surveys with perfect ratings but with negative free text frequently describe lapses in staff behaviours and attitudes [26], such as communication, empathy, courtesy, consideration, compassion and patient focus. A study of patient-reported safety incidents found that 22% were related to communication failures alone [27], while a systematic review of patient complaints [28] judged that one third were related to staff-patient relationships. This may be an underestimate: at the Queen Elizabeth Hospital in Birmingham

1  
2  
3 local analysis shows that while non-technical aspects of patient care caused 37.7% of all issues  
4 raised, they were mentioned in 67.1% of all complaints (data on file). Non-technical issues are  
5 also likely drivers of staff dissatisfaction, as demonstrated by the 487,727 respondents to the  
6 NHS Staff survey in 2017 [29]. These data suggest that patient and staff experience, both  
7 positive and negative, provides an important opportunity for improvement through behaviour  
8 modification.  
9  
10  
11  
12

### 13 **3: Patient and staff experience data are not used optimally to change behaviours.**

14  
15 Using patient experience to improve care is not a trivial task [30]. Lapses in care are usually  
16 multifactorial, the product of interactions between the individual and the 'system'; but from the  
17 perspective of the patient, quality is largely about fiduciary relationships with specific  
18 individuals [31]. Trust Boards must contend with the competing priorities of hundreds of quality  
19 indicators each month, and may prioritise avoiding falling below a quality threshold rather than  
20 achieving higher values of a performance standard once met. A review in 2012 which examined  
21 how hospitals had used research from the UK's national in-patient survey concluded that 'simply  
22 providing hospitals with patient feedback does not automatically have a positive effect on  
23 quality standards' [32]. Even Trusts with a tradition of collecting and using patient survey data  
24 may struggle to convert these data into tangible improvements [33]. In a study of 50 clinical  
25 and managerial staff in three English hospitals, Sheard et al [34] found that the collection of  
26 patient experience feedback was a 'self-perpetuating industry' conducted 'at the expense of  
27 pan-organizational learning or improvements'; ward staff had difficulty using patient feedback.  
28 They concluded that 'macro and micro prohibiting factors come together in a perfect storm  
29 which [prevent] improvements being made'. In a systematic review Gleeson reported that  
30 'Patient experience data were most commonly...used to identify small areas of incremental  
31 change to services that do not require a change to clinician behaviour' [35]. Institutional  
32 commitment to using patient feedback may not be reflected at the front-line, where single  
33 individuals can adversely influence other members of staff [36]. Conversely, frontline staff can  
34 struggle to get their voices heard at senior levels: one of the recommendations of the Mid Staffs  
35 enquiry [17] has been to establish 'Freedom To Speak Up Guardians' in all NHS Trusts to ensure  
36 that staff concerns are heard and acted on [37]. These findings indicate that changing  
37 behaviours requires a change in underlying attitudes at individual, group and organisational  
38 levels. How is this best achieved?  
39  
40  
41  
42  
43  
44  
45  
46  
47  
48

### 49 **4: Changing attitudes and behaviours involves learning through reflection.**

50  
51 Behavioural modification is a key societal preoccupation [38]. A large number of techniques  
52 exist: a proposed behaviour change taxonomy has so far identified 93 different interventions  
53 [39-40]. However, evidence supporting the primacy of one technique over another is not strong  
54 [41-42]. Many interventions involve personal insight development through reflection, but few  
55 behaviour change theories express this explicitly. One which does is the COM-B model [43]  
56 which assimilates nineteen behaviour change theories into a single framework in which the  
57 Behaviour of interest has three determinants, each with two subtypes: Capability (physical and  
58  
59  
60

1  
2  
3 psychological); **O**pportunity (physical and social); and **M**otivation (reflective and automatic).  
4 The automatic subtype for Motivation relies on heuristics, is engaged in conditions of  
5 complexity and stress, and maps to Daniel Kahneman's 'System 1' thinking [44]. The reflective  
6 component is slower, more effortful and analytical ('System 2' thinking). These two subtypes of  
7 motivation map to the 'peripheral' and 'central' routes described in the Elaboration Likelihood  
8 Model of Persuasion [45-46]. Factors influencing motivation (particularly the automatic subtype)  
9 are summarised in the acronym MINDSPACE: Messenger, Incentives, Norms, Defaults, Salience,  
10 Priming, Affect, Commitment and Ego [47]. As the behaviour of interest here is reflection itself,  
11 we need to consider both the automatic factors which influence the desire to reflect and the  
12 more effortful elements of 'reflecting on the need for reflection'. We consider next how  
13 theories of reflection as a behaviour link to theories of reflective learning as a tool for personal  
14 insight development.  
15  
16  
17  
18  
19

20  
21 How does reflection stimulate learning? Kolb presented reflection as a four-stage model:  
22 experience; observation; analysis; and recalibration [48]. Schon described reflection 'in-action',  
23 and 'on-action' [49]. Others emphasise the importance of an emotional component to reflective  
24 learning [50], including the "disorientating dilemma" [51], the realisation that there is a gap  
25 between desired and actual behaviours. Sandars describes reflection as a metacognitive process  
26 that creates a greater understanding of self and situation to inform future actions [52]: looking  
27 back to look forward. This involves a transition from tacit to explicit knowledge [53], in which  
28 socially-acquired norms of behaviour [54] are modified either through individual reflection or,  
29 more powerfully, through group activities [55]. The process shares similarities with Broadwell's  
30 four stages of competence [56]: unconscious incompetence (unaware of problem), conscious  
31 incompetence (data received, now being processed), conscious competence (using data to  
32 improve or disseminate excellence), and unconscious competence (effortless excellence).  
33 Effective reflection appears to involve making this transition, while recalibrating and  
34 reinterpreting experience in-action and on-action. We present a possible model linking theories  
35 of reflective learning to theories of behaviour change in Figure 1.  
36  
37  
38  
39  
40  
41

#### 42 **Figure 1: Conceptual model linking theories of behaviour change to those of reflective learning**

#### 43 **5: Reflective learning could be deployed more effectively to improve care quality.**

44  
45  
46  
47 First described by Dewey in 1933 [57], reflective learning is now a mandatory tool in the  
48 education of health professionals. In the UK, the General Medical Council and others define  
49 reflective practice as '*the process whereby an individual thinks analytically about anything*  
50 *relating to their professional practice with the intention of gaining insight and using the lessons*  
51 *learned to maintain good practice or make improvements where possible*'. They state that  
52 '*Reflecting on ..... experiences is vital to personal wellbeing and development, and to improving*  
53 *the quality of patient care*' [58]. Reflection is incorporated in all healthcare postgraduate  
54 training programmes in the UK, and evidence of reflecting on patient and colleague ('multi-  
55 source') feedback is required for physicians' continuing professional development and  
56 revalidation.  
57  
58  
59  
60

1  
2  
3 However, despite the widespread acceptance of reflection as a tool for self-improvement, its  
4 utility in enhancing performance is uncertain [59-60], as is the efficacy of using patient  
5 experience surveys to promote reflection [61]. People are biased towards favourable events  
6 and judgements [62], and doctors tend to reject the validity of adverse patient feedback [63].  
7 Undesirable information is processed as a threat with physiological correlates, which can  
8 impede learning [64]. Effective reflection requires the emotional strength and capacity to take a  
9 critical view of one's skills, attitudes and behaviours, which may be lacking amongst poor  
10 performers [65]. In the UK, doctors are concerned that honest reflections documented in  
11 personal portfolios might incriminate them in a court of law [66].  
12  
13  
14  
15  
16

17 Communication skills training should provide an opportunity for reflection. However, a review  
18 of 243 studies of teaching communication skills to medical undergraduates identified only 16  
19 interventional studies and only two of these reported behavioural outcomes [67], making it  
20 difficult to determine whether 'communication skills' are sufficient, or even if such courses are  
21 effective at all. At postgraduate level, the effects of communication skills training appear to be  
22 weak or evanescent [68-73], and in one RCT were associated with worse depression amongst  
23 patients in the intervention group [74].  
24  
25  
26

27 By contrast, interventions focused on engaging staff in workplace-based activities which  
28 improve teamworking [75], insight, patient-centred care and empathy may be more effective  
29 and more durable [76-87]. The Cleveland Clinic offers short videos on empathy [88], and similar  
30 internet-based resources demonstrate how emotion may be engaged to stimulate reflection  
31 and promote mutual understanding [89-90]. For reflective learning to improve patient and staff  
32 experience, it must do so by changing 'hearts and minds'. This is the focus of our research.  
33  
34  
35  
36

### 37 **AIMS & OBJECTIVES:**

38  
39 We aim to develop methods for using patient and staff experiences to promote effective  
40 reflection and patient-centred care.  
41  
42  
43

44 Specific objectives include:

- 45 1. Developing a programme theory linking experiential feedback to reflective learning and  
46 behaviour change.
- 47 2. Establishing surveys for recording patient and staff experience.
- 48 3. Determining attitudes to, and uses of, patient and staff experience data.
- 49 4. Determining attitudes to, and techniques for, reflective learning.
- 50 5. Mapping factors which influence reflective learning to the COM-B model of behaviour  
51 change.
- 52 6. Developing and piloting methods for incorporating effective reflection in routine  
53 practice.  
54  
55  
56  
57  
58  
59  
60



## OUTPUTS:

The primary output will be guidance on effective reflective learning, in the form of a framework and toolkit.

Secondary outputs include data on patient and staff experience, how staff use these data to promote reflective learning, and how staff propose to include reflective learning in routine activities in the workplace.

## STUDY DESIGN:

This is a three-year mixed-methods observational study using patient and staff co-design techniques.

In subsequent research, we intend to evaluate the utility of the reflective learning toolkit in a cluster randomised step-wedge trial.

## PARTICIPANTS AND SETTING:

Participants include clinical and managerial staff and patients and relatives from the three acute medical units (AMUs) and five intensive care units (ICUs) of three large urban hospital Trusts: the Queen Elizabeth Hospital Birmingham, Heartlands Hospital Birmingham, and Newcastle upon Tyne NHS Foundation Trust (Royal Victoria Infirmary and Freeman Hospitals). This will provide access to at least 100,000 acute admissions over two years, from which we anticipate surveying around 25% with a response rate of 30%, providing around 7,500 returned questionnaires for analysis.

Each AMU and ICU will have a project group, and these will come together as site teams lead by a senior clinician. Meetings will be chaired by a non-executive director. Local project teams will be asked to ensure inclusion of at least two patient representatives. The research will be directed by the central project team which includes patient representatives, clinicians, social scientists, a behavioural psychologist, an educationalist and a co-design expert. Project governance will be overseen by an independent project steering committee.

The study is located in acute and emergency care settings for several reasons: acutely ill patients represent at least 50% of all hospitalised NHS patients; acute illness accentuates sensitivity to staff behaviours; emergency care creates particular demands on the non-technical skills of staff; and both environments demand a high degree of multidisciplinary team working. Intensive care units offer a much higher ratio of nurses and doctors to patients than AMUs which provides an opportunity for comparison.

## DEFINITIONS AND PROGRAMME THEORY:

As stated above, we define reflective learning as an experiential process of personal insight development, in which one's own and others' experiences are used to produce a change in behaviours. The PEARL programme theory (figure 1) integrates theories of reflective learning with theories of behaviour change, as described in the introduction, using the approach recommended by the MRC for the development and evaluation of complex interventions [91]. Our target behaviour is engagement in effective reflection, with consequential acquisition of insight, behavioural change and improvements to practice/standards of care. The COM-B model [43] will be used to characterise Capability, Opportunity, and Motivation to engage in individual and group reflection, and this analysis will inform the development of tools to support the embedding of reflection in practice. This will be facilitated through the use of the PEARL-formatted COM-B diagram (figure 2) as a diagnostic tool. Diverse activities involving reflection in-action, on-action, solitary and group, can be documented in the box to the left of the diagram. The boxes on the right permit recording of facilitators or inhibitors of the three determinants of behaviour – motivation, opportunity and capability – and their subtypes. We will adapt the programme theory in the light of experience as the project proceeds.

### Figure 2: PEARL diagnostic framework using the COM-B model

## METHODS AND ANALYSIS:

### Figure 3: PEARL Project Gantt Chart

The PEARL project will run for a 3 year period from October 2016-September 2019. Project workstreams and activities are displayed in figure 3.

#### Workstream 1: Project Set-up

We will establish local site project groups as 'communities of practice' [92-93], based on our earlier work showing that clinicians disengaged by multiple quality improvement policy initiatives are more motivated when they have professional ownership of the process and when performance feedback is linked to particular patients or events [94-95]. Local project groups will include a non-Executive Trust Director, patient representatives, and AMU and ICU clinical and managerial staff. Opportunities for feedback and reflection will be identified and local arrangements for project delivery agreed. This includes the process for acquiring, analysing, reporting and benchmarking of data from surveys and local performance and quality data. Local project teams will be asked to hold meetings once every two months to review project outputs, encourage team reflection (for example through existing meetings, team briefs and formal reports) and consider methods for incorporating feedback in routine practice.

## Workstream 2: Experiential data collection

Patient and staff experience data collected routinely in the NHS do not enable responses to inform practice at unit level, and usually do not offer or report free-text responses. Duplication of questions between surveys is common; none simultaneously addresses issues of communication, clinical care, patient safety, satisfaction, and response to feedback. We will therefore select previously validated questions across different questionnaires to create a single, parsimonious survey for patients and relatives, and a separate survey for staff. Both questionnaires will be anonymous, paper-based, permit optical character recognition, employ a 5-point scale for rating agreement, and offer free-text for additional information. Questionnaires will be accompanied by a reply-paid envelope and covering letter. Survey forms will be returned to the central project team to be digitised, analysed, and reported to each Trust's local project lead. Free-text responses will be transcribed and analysed using NVivo. Response rates will be determined from denominator data for each survey group.

Patient & Relative Experience Survey: the questionnaire will be developed from the Family Satisfaction Survey (FS-ICU) [96-98], the Adult In-Patient Survey [12], and the Friends and Family Test (F&FT) [13]. The questionnaire will be offered continuously throughout the project to patients and relatives who have spent > 24 hrs in the AMU , and to all relatives of patients in the ICU > 48hrs. Different methods of distribution will be trialled by the individual teams before definitive implementation. Denominator data will be collected from Trust admission databases to calculate response rates: a response rate of around 30% is anticipated. A covering letter will be provided with the questionnaire, suitably adapted for bereaved families. Performance-importance plots will be derived from the % 'excellent' ratings versus the correlation of each item with the overall weighted satisfaction score (WSS).

Staff Experience Survey: The aim of this survey is to gain insights into individual, contextual and organisational influences on staff behaviour, and attitudes to the use of patient experience for reflection and improvements in care. Questions will be derived from the following validated questionnaires: NHS Staff Core Survey [19], the Staff F&FT [99], Hospital Survey on Patient Safety Culture [100], Teamwork and Safety Climate Survey [101], GMC Trainee Survey [102], and the Self-Reflection and In-Sight Scale (SIRS)[103]. Additional questions will be developed by the central project team to investigate attitudes towards the use of feedback for reflection. Local project teams will be invited to participate in a modified Delphi method to prioritise questions for the final set.

The staff survey will be offered over a two month period during year 2 and year 3 of the project. Free-text will be transcribed and analysed using NVivo. Results will be collated in unit-specific reports benchmarked against aggregated data for the group as a whole, and where this is available, against national performance reports.

The results from both surveys will be presented to the AMUs and ICUs in the form of standardised reports showing the proportion of respondents selecting each level of strength of

1  
2  
3 agreement with each statement. For the patient and relative satisfaction survey we will provide  
4 performance-importance plots which will show the relationship between the level of  
5 satisfaction with each item in the questionnaire, and how that particular item influences overall  
6 satisfaction. Free text will be encoded for thematic analysis using NVivo, and presented to the  
7 staff in each unit. The purpose of the surveys is to stimulate reflective learning by the local  
8 teams.  
9  
10

### 11 12 13 **Workstream 3: Ethnography**

14  
15 This workstream has two phases. *Phase 1* will employ site visits, interviews with around 40  
16 front-line and managerial staff, and workplace-based observations of up to five days per  
17 participating site, to describe the current use of patient experience data, to explore options for  
18 the feedback of data as part of the reflective learning process, and to investigate barriers to and  
19 opportunities for workplace-based reflective learning. *Phase 2* will focus on observations of co-  
20 design workshops, and of the implementation and piloting of components of the toolkit in  
21 practice. Findings from both phases will be used to inform the development of the reflective  
22 learning framework and toolkit in workstream 4.  
23  
24  
25

26  
27 Observations and interviews will be conducted by ethnographers (social scientists) experienced  
28 in making observations in the clinical environment. Publicly visible information sheets  
29 describing the project will be provided in clinical areas. Informed written consent will be  
30 obtained for formal interviews. No staff identifiers (other than professional status/occupational  
31 group) will be collected.  
32  
33  
34

35  
36 Analysis of data will occur over the course of the fieldwork period. Interviews and field notes  
37 will be transcribed verbatim and coded using NVivo. Analysis will draw on elements of grounded  
38 theory, in particular, the constant comparative approach [104] and will remain grounded in the  
39 data. We will use techniques developed through our experience of conducting large scale  
40 ethnographic studies to enable us to manage the large amounts of data generated, and to move  
41 quickly from data to interpretation. These include regular debriefs and the production of  
42 summaries of data by site and across sites, organised by research questions and emerging  
43 themes.  
44  
45  
46

### 47 48 **Workstream 4: Co-Design and Piloting of the Reflective Learning Framework & Toolkit**

49  
50 'Co-design' or 'co-production' involves service users and providers working together using a  
51 structured approach to create improvements[105]. Co-design has been used previously in  
52 exploring patient feedback [106]. We will use an adapted version [107] of the British Design  
53 Council's 'double diamond' approach, of 'Discover, Define, Develop and Deliver' in which the  
54 initial problem ('How to promote effective reflection') is subject to two rounds of divergent and  
55 convergent thinking, first to refine the problem, and second to develop solutions. The co-design  
56 workshops will use creative co-production, which has collective making [108] as it's central  
57 approach to ensure meaningful engagement and creative responses from all participants.  
58  
59  
60

Workstream 4 will consist of 13 co-design meetings: four plenary workshops for the whole collaboration held annually, and three local meetings in year 2 for each local project team conducted on-site at each Trust (nine local meetings in total). Attendees will include patients and relatives, clinical staff, and the non-executive directors. The co-design elements will be developed in collaboration with the researchers from Lab4Living, the Art and Design Research Centre, Sheffield Hallam University. Co-design aims and outputs are shown in Table 1.

Following workshop 3, local project teams will be invited to develop behavioural specifications for embedding a maximum of three interventions into routine clinical activities. Teams will use COM-B as an analytical tool (figure 2) to identify gaps in reflective practice which can be addressed through these behavioural specifications. The teams will present their experiences of selecting, specifying and piloting interventions in the final plenary workshop 4.

| <b>Event</b>    | <b>Participants</b>                                                                    | <b>Aims or activity</b>                                                                                                                                    |
|-----------------|----------------------------------------------------------------------------------------|------------------------------------------------------------------------------------------------------------------------------------------------------------|
| Workshop 1      | All project participants, central location                                             | Discuss the background to the project and review or modify the proposed methodology                                                                        |
| Workshop 2      | All project participants, central location                                             | Co-design approach will be introduced to the local project teams                                                                                           |
| Site meetings 1 | Local project team, project core team, design team, meeting at each of the three sites | Describe 'reflective moments' – occasions when an event stimulated personal insight development                                                            |
| Site meetings 2 |                                                                                        | Discuss attitudes to reflection and how habits and preferences shape response to events and the capacity for insight development                           |
| Site meetings 3 |                                                                                        | Discuss reflective opportunities – how reflection can be incorporated in routine activities in the workplace                                               |
| Workshop 3      | All project participants, central location                                             | Structure and content of the toolkit will be provisionally outlined, and a set of candidate prototype interventions (tools and techniques for reflection). |
| Workshop 4      | All project participants, central location                                             | Teams present experience of developing & piloting interventions.                                                                                           |

Toolkit Development: Outputs from each of the 13 co-design meetings will be documented by the ethnographers and members of the core project team and will feed into toolkit development. The members of the core project team will collate their findings from the co-design meetings and cross-reference them with ethnographic findings from site visits to produce short guidance notes and resource materials under the following headings: Aims of the toolkit; What is reflection?; Why reflect?; How to reflect effectively; Reflection in daily practice;

1  
2  
3 Stimulating reflection in others; Evidencing reflection; and Organisational support for reflection.  
4 The Reflective Learning Framework and Toolkit will be evaluated locally by the participating  
5 units. Staff will be asked to offer their views on the specific interventions. This feedback will be  
6 incorporated in the final version.  
7

### 8 **Patient & Public Involvement**

9  
10  
11 The PEARL project puts patients and relatives at the centre of the research and they were  
12 involved at inception in the initial design, contributing as full collaborators. PEARL is a  
13 developmental project which uses co-design to develop the reflective learning framework. To  
14 develop the framework, patients and relatives from the acute medical units and intensive care  
15 units of four hospitals in three Trusts will work together collaboratively in 12 facilitated  
16 workshops as well as being full members of each local project team. They are helping to design  
17 the patient and staff surveys, and have informed decisions about the extent to which PPIs can  
18 contribute to this type of co-design process. They are co-authors in publications and will  
19 participate in dissemination activities.  
20  
21

### 22 **DISCUSSION**

23  
24  
25 Patient experience data demonstrate important opportunities to improve the quality of  
26 healthcare, particularly those relating to attitudes, behaviours and staff-patient relationships.  
27 However, these data are not used optimally by organisations or frontline staff to make  
28 improvements. Reflective learning should hold the key to converting experience into action, but  
29 there is little evidence about how reflection can most effectively be incorporated in routine  
30 clinical practice for individuals and teams.  
31  
32

33  
34  
35 The PEARL project aims to develop a framework and toolkit to support effective reflection in the  
36 workplace. The apparent simplicity of this aim disguises the underlying complexity of the  
37 relationships linking the various theories of reflection, learning and behaviour change, as  
38 demonstrated in the introduction and in figure 1. These theories show that reflective learning –  
39 which has almost achieved the status of received wisdom in medical education – is itself a form  
40 of behaviour subject to multiple influences, summarised in the COM-B model. Individuals and  
41 groups vary in their capacity, opportunity and motivation to reflect, and to do so in a manner  
42 which promotes personal growth. And having reflected effectively, they must then use these  
43 insights to drive changes in behaviours at the ‘sharp end’ of medicine as well as at institutional  
44 level. It is perhaps not surprising that health systems have difficulty using patient and staff  
45 experience data to improve care quality.  
46  
47  
48  
49

50  
51 Most interactions between patients and health care staff are associated with positive  
52 experiences. This is an asset in terms of reflection and behaviour modification, for two reasons.  
53 First, there are many excellent role models available, and a systematic approach for identifying  
54 and learning from them can help others to acquire similar skills. Second, it takes courage and  
55 resilience to cope with the discovery of imperfections, and this may be easier if the setting is  
56 one which prioritises learning from excellence [23].  
57  
58  
59  
60



1  
2  
3 Emotional engagement is important in engaging people's attention and in promoting empathy,  
4 but not at the price of preventing analytical thinking: the Elaboration Likelihood Model of  
5 Persuasion provides some evidence for the value of analysis over heuristics in sustained change  
6 in attitudes and beliefs [46]. It may be easier to accept and improve deficiencies in technical  
7 skills than in attitudes and behaviours, because technical issues allow us to focus externally on  
8 the tool, while non-technical issues reflect on our inner character and personality, and evidence  
9 of deficiencies is therefore more threatening. Models of reflective learning may help to  
10 'externalise' behaviours, providing enough distance to allow constructive analysis. The process  
11 of self-critiquing may also be made more palatable – that is, enhancing the recipient's resilience  
12 - by focusing initially on positive aspects of feedback.  
13  
14  
15  
16  
17

18 Potential limitations of the co-design process involve self-selection of participants naturally  
19 predisposed to favour reflection rather than sceptics. We will mitigate this by considering  
20 reflective personae when developing the interventions. A limitation of the patient survey is that  
21 respondents may have difficulty distinguishing locations (for example acute medical units versus  
22 ordinary wards).  
23  
24  
25

26 The PEARL project will gather important insights into the 'black box' of reflective learning. The  
27 framework and toolkit will use patient and staff experience to support workplace-based  
28 effective reflection and improvement during routine clinical practice for individuals and teams.  
29 Our intent in subsequent research is to evaluate the logic model (figure 1) and the toolkit in a  
30 mixed-methods step-wedge cluster randomised trial.  
31  
32  
33

#### 34 **DISSEMINATION:**

35 Research findings will be submitted for publication by scientific journals and presentation at  
36 conferences in the disciplines of patient safety, health services research, implementation  
37 science, and intensive care medicine. We will also propose a national cluster randomised step-  
38 wedge trial of the toolkit for large-scale evaluation of impact on patient outcomes. We will offer  
39 this as a resource for national multidisciplinary training programmes through our partner  
40 organisations in acute and intensive care medicine, nursing and allied health professional  
41 programmes.  
42  
43  
44  
45

#### 46 **ETHICS:**

47  
48  
49 The PEARL Project has received ethics approval from the London Brent Research Ethics  
50 Committee (REC Ref 16/LO/224). Implied consent will apply to the return of completed  
51 questionnaires. Informed consent will be sought from participants of ethnographic interviews.  
52  
53

#### 54 **FUNDING**

55  
56  
57 PEARL is funded by the NIHR HS&DR programme (Ref 14/156/23).  
58  
59  
60



## ACKNOWLEDGEMENTS

The PEARL project team are grateful to the study Steering Committee for their invaluable support; Prof Rebecca Lawton, Mr Harry Turner, Prof James Neuberger, and Prof Stephen Brett. Dr Remi Bec and Cheryl Grindell were instrumental in the planning of the codesign workshops.

## CONTRIBUTORSHIP STATEMENT

Olivia Brookes as project manager and collaborator will manage the day to day running of the project under the CI, managing governance and study set-up, processing, analysis and presentation of study findings.

Celia Brown has a strong academic background in pedagogic research at the University of Warwick, and is the lead for medical education and reflection in PEARL, workstream 4. She will contribute to our understanding of how reflection is used to achieve learning.

Carolyn Tarrant is Associate Professor in Health Psychology and Joint Group Lead of the SAPPHIRE group at the University of Leicester. She is the lead for the ethnographic workstream (workstream 3), directing a group of ethnographers making original observations of practice.

Julian Archer is Professor in Medical Education Research at the University of Plymouth. He is our expert on multisource feedback, advising on how to convert feedback into effective reflection.

Mr & Mrs Buckley are patient and relative representatives with extensive experience of the totality of the emergency care pathway. They will provide insights into patient-staff interactions.

Ian Clement is an intensive care consultant at Newcastle Upon Tyne NHS Trust. He will advise on practical aspects of reflective learning and will help co-design the reflection toolkit.

Felicity Evison is the statistician for the project and will oversee the quantitative analysis from the patient and staff survey instruments.

Fang Gao Smith is the local lead for the intensive care unit at Heartlands Hospital. She will advise on practical aspects of reflective learning and will help co-design the reflection toolkit.

Chris Gibbins is consultant in Acute Medicine at Newcastle Upon Tyne NHS Trust. He will advise on practical aspects of reflective learning and will help co-design the reflection toolkit.

Emma Hayton is the Acute Medicine lead at Heartlands Hospital. She will advise on practical aspects of reflective learning and will help co-design the reflection toolkit.

1  
2  
3 Jennifer Jones is the ethnography research fellow, organising and collating information from  
4 interviews and near-patient observations, and responsible for the analysis of qualitative data.  
5  
6

7 Richard Lilford is the PEARL methodologist advising on study design.  
8  
9

10 Randeep Mullhi is the local lead for the intensive care unit at the Queen Elizabeth Hospital. She  
11 will advise on practical aspects of reflective learning and will help co-design the reflection  
12 toolkit.  
13  
14

15 Greg Packer is the trainee representative for the project, also part of the intensive care local  
16 team at Queen Elizabeth Hospital. He will analyse data from the GMC survey.  
17  
18

19 Gavin Perkins is Professor of Intensive Care Medicine at the University of Warwick, and is the  
20 lead for debriefing and feedback in PEARL.  
21  
22

23 Jonathan Shelton is an intensive care consultant at Newcastle Upon Tyne NHS Trust. He will  
24 advise on practical aspects of reflective learning and will help co-design the reflection toolkit.  
25  
26

27 Catherine Snelson is the Acute Medicine lead at the Queen Elizabeth Hospital. She will advise  
28 on practical aspects of reflective learning and will help co-design the reflection toolkit.  
29  
30

31 Paul Sullivan represents the Society of Acute Medicine in PEARL, and provides expertise in  
32 quality improvement in acute medicine.  
33  
34

35 Ivo Vlaev is Professor of Behavioural Sciences at the University of Warwick. He advises the  
36 PEARL project on behaviour change theory and techniques, and will lead this aspect of the  
37 toolkit development.  
38  
39

40 Daniel Wolstenholme is the co-design facilitator who will lead the co-design workshops and help  
41 with the design of the toolkits.  
42  
43

44 Stephen Wright is the senior intensive care consultant at Newcastle Upon Tyne NHS Trust. He  
45 will advise on practical aspects of reflective learning and will help co-design the reflection  
46 toolkit. He also advises the project on the family satisfaction survey.  
47  
48

49 Julian Bion is the Chief Investigator responsible for the overall design, management and conduct  
50 of the study with extensive experience in health services research, pedagogic development, and  
51 intensive care medicine.  
52  
53

#### 54 **COMPETING INTEREST STATEMENT**

55 None declared.  
56  
57  
58  
59  
60

## REFERENCES

1. Dixon-Woods M, Baker R, Charles K, et al. Culture and behaviour in the English National Health Service: overview of lessons from a large multimethod study. *BMJ Qual Saf*. 2014 Feb;23(2):106-15. doi: 10.1136/bmjqs-2013-001947. [Epub 2013 Sep 9].
2. Sheard L, Marsh C, O'Hara J, et al. The patient feedback response framework—understanding why UK hospital staff find it difficult to make improvements based on patient feedback: a qualitative study. *Social Science & Medicine* 2017;178: 19-27.
3. Mannion R, Davies H. Understanding organisational culture for healthcare quality improvement. *BMJ*. 2018 Nov 28;363:k4907. doi: 10.1136/bmj.k4907.
4. Martin GP, Aveling EL, Campbell A, et al. Making soft intelligence hard: a multi-site qualitative study of challenges relating to voice about safety concerns. *BMJ Qual Saf*. 2018 Sep;27(9):710-717. doi: 10.1136/bmjqs-2017-007579. [Epub 2018 Feb 19]
5. Armstrong N, Brewster L, Tarrant C, et al. Taking the heat or taking the temperature? A qualitative study of a large-scale exercise in seeking to measure for improvement, not blame. *Soc Sci Med*. 2018 Feb;198:157-164. doi: 10.1016/j.socscimed.2017.12.033. [Epub 2018 Jan 2]
6. World Health Organization. The world health report 2000. Health systems: improving performance. WHO 2000.
7. Institute of Medicine. Crossing the quality chasm: a new health system for the 21st century. National Academy Press, 2001.
8. Doyle C, Lennox L, Bell D. A systematic review of evidence on the links between patient experience and clinical safety and effectiveness. *BMJ Open* 2013;3:e001570. doi:10.1136/bmjopen-2012-001570
9. Darzi A. High Quality Care For All. NHS Next Stage Review Final Report. Department of Health 2008.
10. NHS Outcomes Framework, accessed Feb 2019: <https://digital.nhs.uk/data-and-information/publications/ci-hub/nhs-outcomes-framework>
11. Care Quality Commission, accessed Feb 2019: <https://www.cqc.org.uk/file/151928>
12. Care Quality Commission, Adult In-Patient Survey 2017, accessed Feb 2019: <http://www.cqc.org.uk/publications/surveys/adult-inpatient-survey-2016>
13. NHS Friends and Family Test, accessed Feb 2019. <https://www.england.nhs.uk/fft/>
14. NHS Digital, Data on Written Complaints in the NHS, accessed Feb 2019: <https://digital.nhs.uk/data-and-information/publications/statistical/data-on-written-complaints-in-the-nhs>
15. HCAHPS, accessed Feb 2019: <https://www.hcahpsonline.org/>
16. Australian Commission on Safety and Quality in Health Care. National safety and quality health service (NSQHS) standards. Sydney: ACSQHC; 2012.
17. Francis R. Report of the Mid Staffordshire NHS Foundation Trust Public Inquiry. London. The Stationery Office 6 February 2013
18. Gosport Enquiry 2018, accessed Feb 2019: <https://www.gosportpanel.independent.gov.uk/panel-report/>

19. NHS Staff Survey , accessed Feb 2019:  
<http://www.nhsstaffsurveys.com/Page/1056/Home/NHS-Staff-Survey-2018/>
20. Aiken LH, Sermeus W, Van den Heede K, et al. Patient safety, satisfaction, and quality of hospital care: cross sectional surveys of nurses and patients in 12 countries in Europe and the United States. *BMJ*. 2012 Mar 20;344:e1717. doi: 10.1136/bmj.e1717.
21. Flott K, Darzi A, Mayer E. Care pathway and organisational features driving patient experience: statistical analysis of large NHS datasets. *BMJ Open* 2018;8:e020411. doi: 10.1136/bmjopen-2017-020411
22. Lawton R, O'hara J K, Sheard L, et al. Can staff and patient perspectives on hospital safety predict harm-free care? An analysis of staff and patient survey data and routinely collected outcomes. *BMJ Qual Saf*, 2015;24(6), 369-376.
23. Learning from Excellence, accessed Feb 2019: <https://learningfromexcellence.com/>
24. Burt J, Newbould J, Abel G et al. Investigating the meaning of 'good' or 'very good' patient evaluations of care in English general practice: a mixed methods study. *BMJ Open*. 2017 Mar 2;7(3):e014718.
25. Healthwatch 2014. Suffering in silence: Listening to consumer experiences of the health and social care complaints system. *Healthwatch*, October 2014
26. Gallan AS, Girju M, Girju R. Perfect ratings with negative comments: Learning from contradictory patient survey responses. *Patient Experience Journal* 2017; 4(3): 15-28.
27. O'Hara JK, Reynolds C, Moore S, et al. What can patients tell us about the quality and safety of hospital care? Findings from a UK multicentre survey study. *BMJ Qual Saf*. 2018 Sep;27(9):673-682. doi: 10.1136/bmjqs-2017-006974. [Epub 2018 Mar 15]
28. Reader TW, Gillespie A, Roberts J. Patient complaints in healthcare systems: a systematic review and coding taxonomy. *BMJ Qual Saf* 2014;23:678–89.
29. NHS Staff survey 2017, accessed Feb 2019:  
<http://www.nhsstaffsurveys.com/Page/1064/Latest-Results/2017-Results/>
30. Flott KM, Graham C, Darzi A, et al. Can we use patient-reported feedback to drive change? The challenges of using patient-reported feedback and how they might be addressed. *BMJ Qual Saf* 2016; 26(6): 502 to 507
31. Scott DAH, Grant SM. A meta-ethnography of the facilitators and barriers to successful implementation of patient complaints processes in health-care settings. *Health Expect*. 2018 Apr;21(2):508-517.
32. DeCourcy A, West E, Barron D. The National Adult Inpatient Survey conducted in the English National Health Service from 2002 to 2009: how have the data been used and what do we know as a result? *BMC Health Serv Res* 2012;12:71.
33. Lee R, Baeza JI, Fulop NJ. The use of patient feedback by hospital boards of directors: a qualitative study of two NHS hospitals in England. *BMJ Qual Saf* 2018;27:103-109.
34. Sheard L, Peacock R, Marsh C et al. What's the problem with patient experience feedback? A macro and micro understanding, based on findings from a three-site UK qualitative study. *Health Expectations*, 22 (1). pp. 46-53.
35. Gleeson H, Calderon A, Swami V, et al. Systematic review of approaches to using patient experience data for quality improvement in healthcare settings. *BMJ Open*. 2016 Aug 16;6(8):e011907. doi: 10.1136/bmjopen-2016-011907.

- 1
  - 2
  - 3
  - 4
  - 5
  - 6
  - 7
  - 8
  - 9
  - 10
  - 11
  - 12
  - 13
  - 14
  - 15
  - 16
  - 17
  - 18
  - 19
  - 20
  - 21
  - 22
  - 23
  - 24
  - 25
  - 26
  - 27
  - 28
  - 29
  - 30
  - 31
  - 32
  - 33
  - 34
  - 35
  - 36
  - 37
  - 38
  - 39
  - 40
  - 41
  - 42
  - 43
  - 44
  - 45
  - 46
  - 47
  - 48
  - 49
  - 50
  - 51
  - 52
  - 53
  - 54
  - 55
  - 56
  - 57
  - 58
  - 59
  - 60
36. Sheard L, Marsh C, O'Hara J, et al. Exploring how ward staff engage with the implementation of a patient safety intervention: a UK-based qualitative process evaluation. *BMJ Open*. 2017 Jul 13;7(7):e014558. doi: 10.1136/bmjopen-2016-014558.
37. Freedom To Speak Up Guardians, accessed Feb 2019: <https://www.cqc.org.uk/national-guardians-office/content/national-guardians-office>
38. The Behavioural Insights Team. Cabinet Office, accessed Feb 2019: <https://www.behaviouralinsights.co.uk/>
39. Michie S, Richardson M, Johnston M, et al. The behavior change technique taxonomy (v1) of 93 hierarchically clustered techniques: building an international consensus for the reporting of behavior change interventions. *Ann Behav Med*. 2013 Aug;46(1):81-95. doi: 10.1007/s12160-013-9486-6.
40. Michie S, West R, Sheals K, et al. Evaluating the effectiveness of behavior change techniques in health-related behavior: a scoping review of methods used. *Translational Behavioral Medicine* 2018; 8(2): 212–224, <https://doi.org/10.1093/tbm/ibx019>
41. Johnson MJ, May CR. Promoting professional behaviour change in healthcare: what interventions work, and why? A theory-led overview of systematic reviews *BMJ Open* 2015; 5(9): e008592. doi: 10.1136/bmjopen-2015-008592
42. Chauhan BF, Jeyaraman MM, Mann AS, et al. Behavior change interventions and policies influencing primary healthcare professionals' practice—an overview of reviews. *Implement Sci*. 2017;12:3. doi: 10.1186/s13012-016-0538-8.
43. Michie S, van Stralen MM, West R. The behaviour change wheel: a new method for characterising and designing behaviour change interventions. *Implement Sci*. 2011;6:42.
44. Kahneman D. *Thinking, fast and slow*. Penguin 2012.
45. Petty R E, Cacioppo J T. The effects of involvement on responses to argument quantity and quality: Central and peripheral routes to persuasion. *Journal of Personality and Social Psychology*, 1984;46(1), 69-81. <http://dx.doi.org/10.1037/0022-3514.46.1.69>
46. O'Keefe D. The Elaboration Likelihood Model. In Dillard JP and Shen L. *The SAGE Handbook of Persuasion: Developments in Theory and Practice*. SAGE publications 2012.
47. Dolan P, Hallsworth M, Halpern D, et al. Influencing behaviour: The mindspace way. *Journal of Economic Psychology* 2012; 33(1): 264-277.
48. Kolb D A, Fry R (1975) Toward an applied theory of experiential learning. in C. Cooper (ed.) *Theories of Group Process*, London: John Wiley
49. Schön D A (1983). *The reflective practitioner: How professionals think in action*. New York: Basic Books.
50. Pedler M, Burgoyne J, Boydell T (1991, rev 1996) *The Learning Company. A strategy for sustainable development*, London: McGraw-Hill.
51. Mezirow J. 1981. A critical theory of adult learning and education. *Adult Educ* 32(1):3–24.
52. Sandars J. The use of reflection in medical education: AMEE Guide No. 44. *Med Teach*. 2009 Aug;31(8):685-95.
53. Nonaka I, von Krogh G. Tacit Knowledge and Knowledge Conversion: Controversy and Advancement in Organizational Knowledge Creation Theory. *Organization Science* 2009; 20(3): 635-52.

- 1  
2  
3  
4  
5  
6  
7  
8  
9  
10  
11  
12  
13  
14  
15  
16  
17  
18  
19  
20  
21  
22  
23  
24  
25  
26  
27  
28  
29  
30  
31  
32  
33  
34  
35  
36  
37  
38  
39  
40  
41  
42  
43  
44  
45  
46  
47  
48  
49  
50  
51  
52  
53  
54  
55  
56  
57  
58  
59  
60
54. Bandura A . Self-efficacy: Toward a unifying theory of behavioral change. *Psychological Review*, 1977;84(2), 191-215. <http://dx.doi.org/10.1037/0033-295X.84.2.191>
  55. Aronson L. Twelve tips for teaching reflection at all levels of medical education. *Med Teach*. 2011;33(3):200-5. doi: 10.3109/0142159X.2010.507714. [Epub 2010 Sep 27]
  56. Broadwell MM. Teaching for learning (XVI). *The Gospel Guardian*, 20 February 1969. [http://www.wordsfityspoken.org/gospel\\_guardian/v20/v20n41p1-3a.html](http://www.wordsfityspoken.org/gospel_guardian/v20/v20n41p1-3a.html)
  57. Dewey, J. (1933). *How we think: A restatement of the relation of reflective thinking to the educative process*. Boston: D.C. Heath and Company.
  58. General Medical Council. *The Reflective Practitioner. Guidance for doctors and medical students*. Academy of Medical Royal Colleges, the UK Conference of Postgraduate Medical Deans, the General Medical Council, and the Medical Schools Council. GMC, London 2018. <https://www.gmc-uk.org/education/standards-guidance-and-curricula/guidance/the-reflective-practitioner---guidance-for-doctors-and-medical-students>
  59. Winkel AF, Yingling S, Jones AA, et al. Reflection as a Learning Tool in Graduate Medical Education: A Systematic Review. *J Grad Med Educ*. 2017 Aug;9(4):430-439. doi: 10.4300/JGME-D-16-00500.1.
  60. Ferguson J, Wakeling J, Bowie P. Factors influencing the effectiveness of multisource feedback in improving the professional practice of medical doctors: a systematic review. *BMC Med Educ*. 2014; 14: 76.
  61. Boiko O, Campbell JL, Elmore N, et al. The role of patient experience surveys in quality assurance and improvement: a focus group study in English general practice. *Health Expect*. 2015 Dec;18(6):1982-94.
  62. Kappes A, Faber NS, Kahane G, et al. Concern for Others Leads to Vicarious Optimism. *Psychol Sci*. 2018 Mar;29(3):379-389. doi: 10.1177/0956797617737129. [Epub 2018 Jan 30]
  63. Farrington C, Burt J, Boiko O, et al. Doctors' engagements with patient experience surveys in primary and secondary care: a qualitative study. *Health Expectations* 2017;20(3):385-394. doi:10.1111/hex.12465.
  64. Garrett N, González-Garzón AM, Foulkes L, et al. Updating Beliefs under Perceived Threat. *J Neurosci*. 2018 Sep 5; 38(36): 7901–7911. doi: 10.1523/JNEUROSCI.0716-18.2018
  65. Ehrlinger J, Johnson K, Banner M, et al. Why the Unskilled Are Unaware: Further Explorations of (Absent) Self-Insight Among the Incompetent. *Organ Behav Hum Decis Process*. 2008 Jan 1;105(1):98-121.
  66. The Bawa-Garba case. *BMJ*, accessed Feb 2019: <https://www.bmj.com/bawa-garba>
  67. Sanson-Fisher R, Hobden B, Waller A, et al. Methodological quality of teaching communication skills to undergraduate medical students: a mapping review. *BMC Med Educ*. 2018 Jun 27;18(1):151.
  68. Papageorgiou A, Loke Y K, Fomage M. Communication skills training for mental health professionals working with people with severe mental illness. *Cochrane Database Syst Rev*. 2017 Jun 13;6:CD010006.



- 1  
2  
3 69. Ditton-Phare P, Loughland C, Duvivier R, et al. Communication skills in the training of  
4 psychiatrists: A systematic review of current approaches. *Aust N Z J Psychiatry*. 2017  
5 Jul;51(7):675-692.  
6  
7 70. Moore PM, Rivera Mercado S, Grez Artigues M, et al. Communication skills training for  
8 healthcare professionals working with people who have cancer. *Cochrane Database Syst*  
9 *Rev*. 2013 Mar 28;(3):CD003751.  
10  
11 71. Brighton LJ, Koffman J, Hawkins A, et al. A Systematic Review of End-of-Life Care  
12 Communication Skills Training for Generalist Palliative Care Providers: Research Quality  
13 and Reporting Guidance. *J Pain Symptom Manage*. 2017 Sep;54(3):417-425.  
14  
15 72. Oladeru O A, Hamadu M, Cleary P D, et al. House Staff Communication Training and  
16 Patient Experience Scores. *J Patient Exp*. 2017 Mar; 4(1): 28–36. Published online 2017  
17 Feb 20  
18  
19 73. Chung H O, Oczkowski S J, Hanvey L, et al. Educational interventions to train healthcare  
20 professionals in end-of-life communication: a systematic review and meta-analysis.  
21 *BMC Med Educ*. 2016; 16: 131  
22  
23 74. Curtis J R, Back A L, Ford D W, et al. Effect of communication skills training for residents  
24 and nurse practitioners on quality of communication with patients with serious illness: a  
25 randomized trial. *JAMA*. 2013 Dec 4;310(21):2271-81  
26  
27 75. Haynes A B, Edmondson L, Lipsitz S R, et al. Mortality Trends After a Voluntary Checklist-  
28 based Surgical Safety Collaborative. *Ann Surg*. 2017 Dec;266(6):923-929.  
29  
30 76. Derksen F, Bensing J, Lagro-Janssen A. Effectiveness of empathy in general practice: a  
31 systematic review. *Br J Gen Pract*. 2013 Jan;63(606):e76-84.  
32  
33 77. Kelm Z, Womer J, Walter J K, et al. Interventions to cultivate physician empathy: a  
34 systematic review. *BMC Med Educ*. 2014 Oct 14;14:219.  
35  
36 78. Dwamena F, Holmes-Rovner M, Gaulden C M, et al. Interventions for providers to  
37 promote a patient-centred approach in clinical consultations. *Cochrane Database Syst*  
38 *Rev*. 2012 Dec 12;12:CD003267.  
39  
40 79. Mazzi M A, Rimondini M, Deveugele M, et al. What do people appreciate in physicians'  
41 communication? An international study with focus groups using videotaped medical  
42 consultations. *Health Expect* 2015 Oct;18(5):1215-26.  
43  
44 80. Agledahl K M, Gulbrandsen P, Forde R, et al. Courteous but not curious: how doctors'  
45 politeness masks their existential neglect. A qualitative study of video-recorded patient  
46 consultations. *J Med Ethics*. 2011 Nov;37(11):650-4.  
47  
48 81. Beach M C, Sugarman J, Johnson R L, et al. Do patients treated with dignity report higher  
49 satisfaction, adherence, and receipt of preventive care? *Ann Fam Med*. 2005 Jul-  
50 Aug;3(4):331-8.  
51  
52 82. Laganá L, Gavrilova B A, Carter D B, et al. A Randomized Controlled Study on the Effects  
53 of a Documentary on Students' Empathy and Attitudes towards Older Adults. *Psychol*  
54 *Cogn Sci*. 2017;3(3):79-88.  
55  
56 83. Nelson S W, Germann C A, MacVane C Z, et al. Intern as Patient: A Patient Experience  
57 Simulation to Cultivate Empathy in Emergency Medicine Residents. *West J Emerg Med*.  
58 2018 Jan;19(1):41-48  
59  
60



- 1  
2  
3  
4  
5  
6  
7  
8  
9  
10  
11  
12  
13  
14  
15  
16  
17  
18  
19  
20  
21  
22  
23  
24  
25  
26  
27  
28  
29  
30  
31  
32  
33  
34  
35  
36  
37  
38  
39  
40  
41  
42  
43  
44  
45  
46  
47  
48  
49  
50  
51  
52  
53  
54  
55  
56  
57  
58  
59  
60
84. Pollak K I, Alexander S C, Tulsy J A, et al. Physician empathy and listening: associations with patient satisfaction and autonomy. *J Am Board Fam Med*. 2011 Nov-Dec;24(6):665-72.
  85. Buckman R, Tulsy J A, Rodin G. Empathic responses in clinical practice: intuition or tuition? *CMAJ*. 2011 Mar 22;183(5):569-71
  86. Amutio-Kareaga A, Garcia-Campayo J, Delgado L C, et al. Improving Communication between Physicians and Their Patients through Mindfulness and Compassion-Based Strategies: A Narrative Review. *J Clin Med*. 2017 Mar 17;6(3).
  87. Kiosses V N, Karathanos V T, Tatsioni A. Empathy promoting interventions for health professionals: a systematic review of RCTs. *Journal of Compassionate Health Care* 2016 3:7
  88. Empathy: The Human Connection to Patient Care, accessed Feb 2019: [https://www.youtube.com/watch?v=cDDWvj\\_q-o8](https://www.youtube.com/watch?v=cDDWvj_q-o8)
  89. TEDxMaastricht - Fred Lee - "Patient Satisfaction or Patient Experience?" accessed Feb 2019: <https://www.youtube.com/watch?v=tylvc9dY400>
  90. Say This, Not That: Patient Experience Video. Eastern Idaho Regional Medical Center, accessed Feb 2019: <https://www.youtube.com/watch?v=r842Ylpa-nQ>
  91. Moore G F, Audrey S, Barker M, et al. Process evaluation of complex interventions: Medical Research Council guidance. *BMJ* 2015; 350:h1258. doi: 10.1136/bmj.h1258.
  92. Wenger E. Communities of Practice: A brief introduction. STEP Leadership Workshop, University of Oregon, October, 2011. <https://scholarsbank.uoregon.edu/xmlui/handle/1794/11736>
  93. Li L C, Grimshaw J M, Nielsen C, et al. Evolution of Wenger's concept of community of practice. *Implement Sci* 2009;4:11 doi:10.1186/1748-5908-4-11
  94. Dixon-Woods M, Leslie M, Bion J, et al. What Counts? An Ethnographic Study of Infection Data Reported to a Patient Safety Program. *Milbank Quarterly* 2012; 90(3): 548–591
  95. Dixon-Woods M, Leslie M, Tarrant C, et al. Explaining Matching Michigan: an ethnographic study of a patient safety program. *Implementation Science* 2013, 8:70 doi:10.1186/1748-5908-8-70.
  96. Wall R J, Engelberg R A, Downey L, et al. Refinement, scoring and validation of the Family Satisfaction in Intensive Care Unit (FS-ICU) survey. *Critical Care Medicine* 2007; Vol/is 35/1 p271-279
  97. Wright S E, Walmsley E, Harvey S E, et al. Family-Reported Experiences Evaluation (FREE) study: a mixed-methods study to evaluate families' satisfaction with adult critical care services in the NHS. *Health Services and Delivery Research* 2015; 3(45).
  98. Harrison D A, Ferrando-Vivas P, Wright S E, et al. Family-Reported Experiences Evaluation Study Investigators. Psychometric assessment of the Family Satisfaction in the Intensive Care Unit questionnaire in the United Kingdom. *J Crit Care*. 2017 Apr;38:346-350. doi: 10.1016/j.jcrc.2016.10.023. [Epub 2016 Nov 5]
  99. NHS Staff Friends & Family Test, accessed Feb 2019: <https://www.england.nhs.uk/fft/staff-fft/>

- 1  
2  
3 100. Hospital Survey on Patient Safety Culture, accessed Feb 2019:  
4 [https://www.ahrq.gov/sites/default/files/wysiwyg/professionals/quality-patient-](https://www.ahrq.gov/sites/default/files/wysiwyg/professionals/quality-patient-safety/patientsafetyculture/hospital/resources/hospscanform.pdf)  
5 [safety/patientsafetyculture/hospital/resources/hospscanform.pdf](https://www.ahrq.gov/sites/default/files/wysiwyg/professionals/quality-patient-safety/patientsafetyculture/hospital/resources/hospscanform.pdf)  
6  
7 101. Teamwork and Safety Climate Survey, accessed Feb 2019:  
8 <https://med.uth.edu/chqs/files/2012/05/Survey-SAQ-Teamwork-Safety-Climate-.pdf>  
9  
10 102. General Medical Council Trainee Survey, accessed Feb 2019: [https://www.gmc-](https://www.gmc-uk.org/education/how-we-quality-assure/national-training-surveys/national-training-surveys---doctors-in-training)  
11 [uk.org/education/how-we-quality-assure/national-training-surveys/national-training-](https://www.gmc-uk.org/education/how-we-quality-assure/national-training-surveys/national-training-surveys---doctors-in-training)  
12 [surveys---doctors-in-training](https://www.gmc-uk.org/education/how-we-quality-assure/national-training-surveys/national-training-surveys---doctors-in-training)  
13  
14 103. Grant A M, Franklin J, Langford P. The Self-Reflection and Insight Scale: A New Measure  
15 of Private Self-Consciousness. *Social Behaviour and Personality* 2002, 30(8), 821-836.  
16  
17 104. Glaser B, Strauss A. 1967, The discovery of grounded theory, Aldine Publishing  
18 Company, Hawthorne, NY.  
19  
20 105. Batalden M, Batalden P, Margolis P, et al. Coproduction of healthcare service. *BMJ*  
21 *Qual Saf.* 2016 Jul;25(7):509-17. doi: 10.1136/bmjqs-2015-004315.  
22  
23 106. Scott J, Heavey E, Waring J, et al. Healthcare professional and patient codesign and  
24 validation of a mechanism for service users to feedback patient safety experiences  
25 following a care transfer: a qualitative study. *BMJ Open.* 2016 Jul 12;6(7):e011222. doi:  
26 10.1136/bmjopen-2016-011222.  
27  
28 107. Better Services by Design, accessed Feb 2019 , [http://www.bsbd.org.uk/double-](http://www.bsbd.org.uk/double-diamond-design-process/)  
29 [diamond-design-process/](http://www.bsbd.org.uk/double-diamond-design-process/)  
30  
31 108. Langley J , Wolstenholme D, Cooke J. 2018. “‘Collective Making’ as Knowledge  
32 Mobilisation: The Contribution of Participatory Design in the Co-Creation of Knowledge  
33 in Healthcare.” *BMC Health Services Research* 18 (1). BMC Health Services Research:  
34 585. doi:10.1186/s12913-018-3397-y.  
35  
36  
37  
38  
39  
40  
41  
42  
43  
44  
45  
46  
47  
48  
49  
50  
51  
52  
53  
54  
55  
56  
57  
58  
59  
60

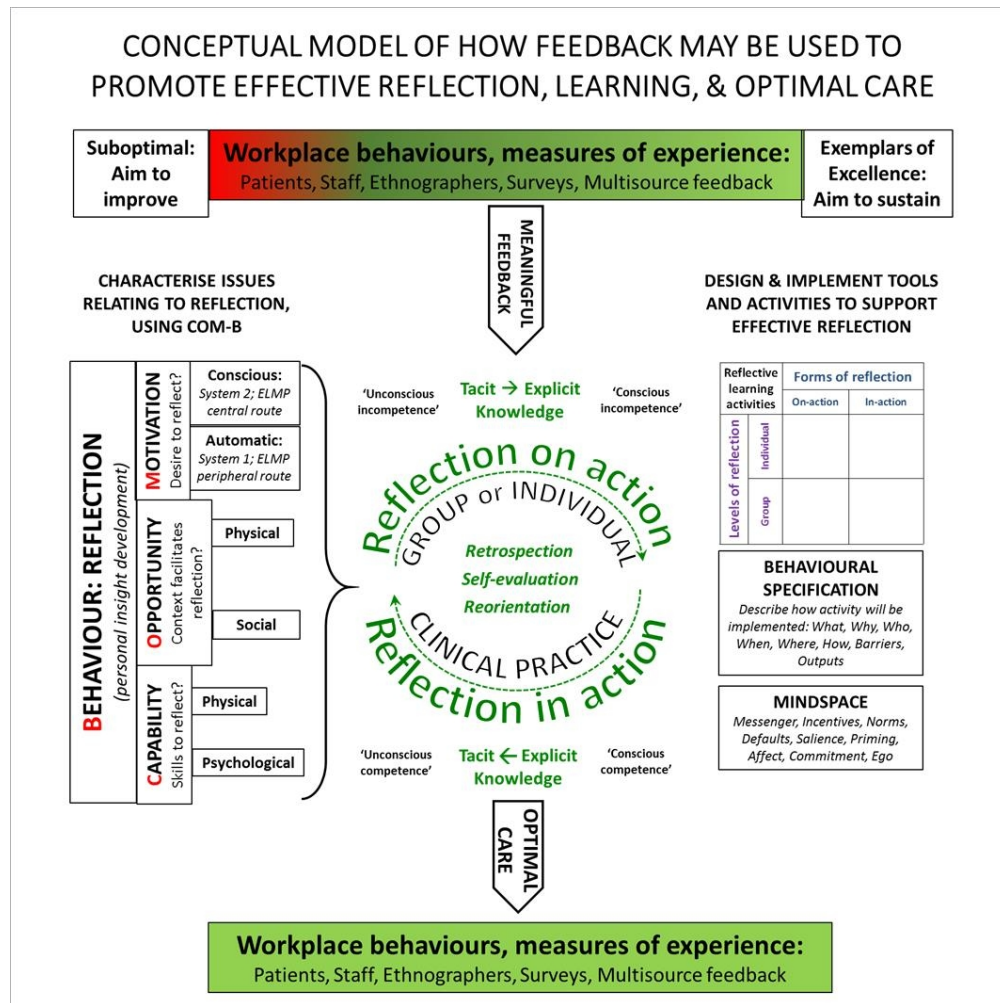

Figure 1: Conceptual model linking theories of behaviour change to those of reflective learning

90x90mm (300 x 300 DPI)

1  
2  
3  
4  
5  
6  
7  
8  
9  
10  
11  
12  
13  
14  
15  
16  
17  
18  
19  
20  
21  
22  
23  
24  
25  
26  
27  
28  
29  
30  
31  
32  
33  
34  
35  
36  
37  
38  
39  
40  
41  
42  
43  
44  
45  
46  
47  
48  
49  
50  
51  
52  
53  
54  
55  
56  
57  
58  
59  
60

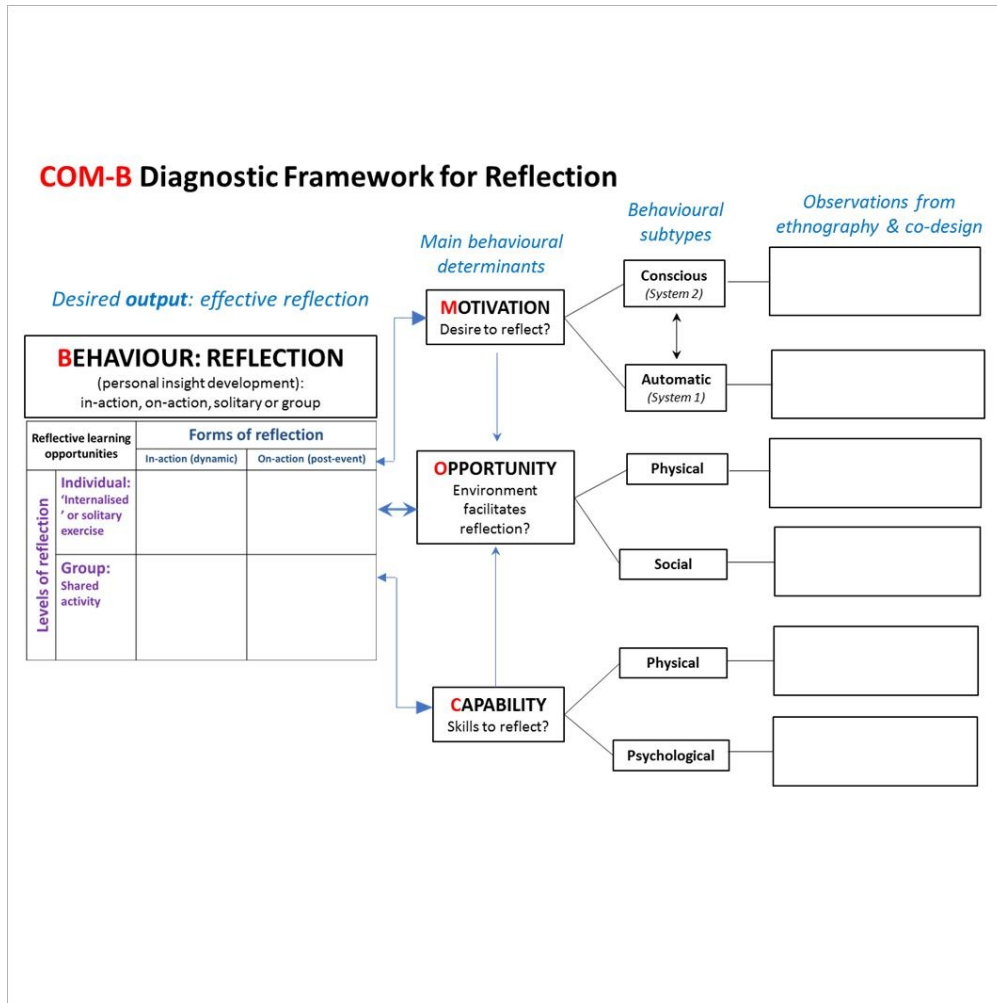

Figure 2: PEARL diagnostic framework using the COM-B model

90x90mm (300 x 300 DPI)

1  
2  
3  
4  
5  
6  
7  
8  
9  
10  
11  
12  
13  
14  
15  
16  
17  
18  
19  
20  
21  
22  
23  
24  
25  
26  
27  
28  
29  
30  
31  
32  
33  
34  
35  
36  
37  
38  
39  
40  
41  
42  
43  
44  
45  
46  
47  
48  
49  
50  
51  
52  
53  
54  
55  
56  
57  
58  
59  
60

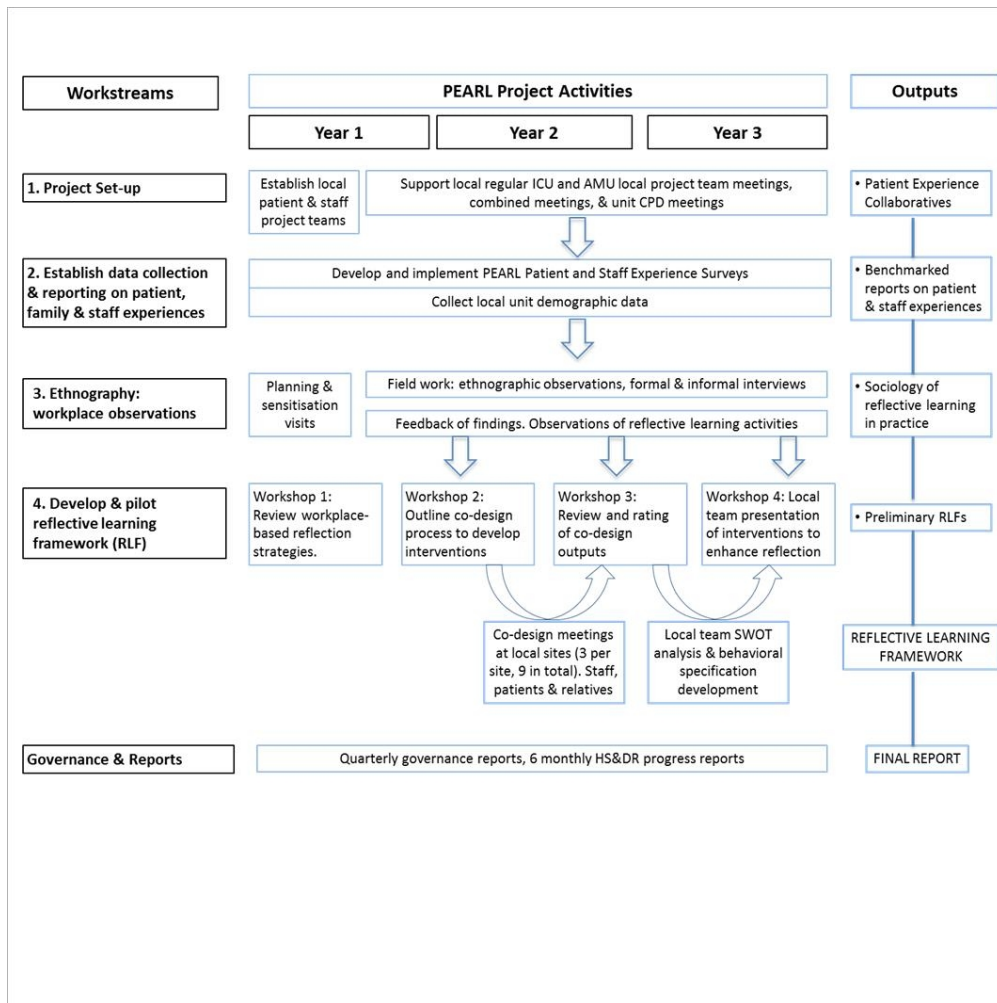

Figure 3: PEARL Project Gantt Chart

90x90mm (300 x 300 DPI)

# BMJ Open

## PATIENT EXPERIENCE AND REFLECTIVE LEARNING (PEARL): A MIXED METHODS PROTOCOL FOR STAFF INSIGHT DEVELOPMENT IN ACUTE AND INTENSIVE CARE MEDICINE IN THE UK

|                                 |                                                                                                                                                                                                                                                                                                                                                                                                                                                                                                                                                                                                                                                                                                                                                                                                                                                                                                                                                                                                                                                                                                                                                                                                                                                                                                                                                                                                                                                                                                                                                                                                                                                                                                                               |
|---------------------------------|-------------------------------------------------------------------------------------------------------------------------------------------------------------------------------------------------------------------------------------------------------------------------------------------------------------------------------------------------------------------------------------------------------------------------------------------------------------------------------------------------------------------------------------------------------------------------------------------------------------------------------------------------------------------------------------------------------------------------------------------------------------------------------------------------------------------------------------------------------------------------------------------------------------------------------------------------------------------------------------------------------------------------------------------------------------------------------------------------------------------------------------------------------------------------------------------------------------------------------------------------------------------------------------------------------------------------------------------------------------------------------------------------------------------------------------------------------------------------------------------------------------------------------------------------------------------------------------------------------------------------------------------------------------------------------------------------------------------------------|
| Journal:                        | <i>BMJ Open</i>                                                                                                                                                                                                                                                                                                                                                                                                                                                                                                                                                                                                                                                                                                                                                                                                                                                                                                                                                                                                                                                                                                                                                                                                                                                                                                                                                                                                                                                                                                                                                                                                                                                                                                               |
| Manuscript ID                   | bmjopen-2019-030679.R2                                                                                                                                                                                                                                                                                                                                                                                                                                                                                                                                                                                                                                                                                                                                                                                                                                                                                                                                                                                                                                                                                                                                                                                                                                                                                                                                                                                                                                                                                                                                                                                                                                                                                                        |
| Article Type:                   | Protocol                                                                                                                                                                                                                                                                                                                                                                                                                                                                                                                                                                                                                                                                                                                                                                                                                                                                                                                                                                                                                                                                                                                                                                                                                                                                                                                                                                                                                                                                                                                                                                                                                                                                                                                      |
| Date Submitted by the Author:   | 19-Jun-2019                                                                                                                                                                                                                                                                                                                                                                                                                                                                                                                                                                                                                                                                                                                                                                                                                                                                                                                                                                                                                                                                                                                                                                                                                                                                                                                                                                                                                                                                                                                                                                                                                                                                                                                   |
| Complete List of Authors:       | Brookes, Olivia; University Hospitals Birmingham NHS Foundation Trust, Research, Development & Innovation<br>Brown, Celia; The University of Warwick, Warwick Medical School (WMS)<br>Tarrant, Carolyn; University of Leicester<br>Archer, Julian; Royal Australasian College of Surgeons; Peninsula College of Medicine and Dentistry<br>Buckley, Duncan<br>Buckley, Lisa<br>Clement, Ian; Newcastle Upon Tyne Hospitals NHS Foundation Trust<br>Evison, Felicity; University Hospitals Birmingham NHS Foundation Trust, Department of Health Informatics<br>Gao, Fang; University of Birmingham, Institute of Inflammation and Ageing, College of Medical and Dental Sciences; Heart of England NHS Foundation Trust, Academic Department of Anaesthesia, Critical Care, Pain and Resuscitation<br>Gibbins, Chris; Newcastle Upon Tyne Hospitals NHS Foundation Trust<br>Hayton, Emma; University Hospitals Birmingham NHS Foundation Trust<br>Jones, Jennifer; University of Leicester<br>Lilford, Richard; University of Warwick, Division of Health and Population Sciences<br>Mullhi, Randeep; University Hospitals Birmingham NHS Foundation Trust<br>Packer, Greg; University Hospitals Birmingham NHS Foundation Trust<br>Perkins, Gavin; University of Warwick, Clinical Trials Unit<br>Shelton, Jonathan; Newcastle Upon Tyne Hospitals NHS Foundation Trust<br>Snelson, Catherine; University Hospital Birmingham, Critical Care<br>Sullivan, Paul; Imperial College, CLAHRC<br>Vlaev, Ivo; Warwick Business School,<br>Wolstenholme, Daniel; NIHR CLAHRC Yorkshire and Humber,<br>Wright, Stephen; Newcastle upon Tyne Hospitals, Anaesthesia<br>Bion, Julian; University of Birmingham, Intensive Care Medicine |
| <b>Primary Subject Heading</b>: | Health services research                                                                                                                                                                                                                                                                                                                                                                                                                                                                                                                                                                                                                                                                                                                                                                                                                                                                                                                                                                                                                                                                                                                                                                                                                                                                                                                                                                                                                                                                                                                                                                                                                                                                                                      |
| Secondary Subject Heading:      | Communication, Intensive care, Medical education and training, Qualitative research                                                                                                                                                                                                                                                                                                                                                                                                                                                                                                                                                                                                                                                                                                                                                                                                                                                                                                                                                                                                                                                                                                                                                                                                                                                                                                                                                                                                                                                                                                                                                                                                                                           |
| Keywords:                       | MEDICAL EDUCATION & TRAINING, QUALITATIVE RESEARCH, Quality in                                                                                                                                                                                                                                                                                                                                                                                                                                                                                                                                                                                                                                                                                                                                                                                                                                                                                                                                                                                                                                                                                                                                                                                                                                                                                                                                                                                                                                                                                                                                                                                                                                                                |

1  
2  
3  
4  
5  
6  
7  
8  
9  
10  
11  
12  
13  
14  
15  
16  
17  
18  
19  
20  
21  
22  
23  
24  
25  
26  
27  
28  
29  
30  
31  
32  
33  
34  
35  
36  
37  
38  
39  
40  
41  
42  
43  
44  
45  
46  
47  
48  
49  
50  
51  
52  
53  
54  
55  
56  
57  
58  
59  
60

|  |                                                           |
|--|-----------------------------------------------------------|
|  | health care < HEALTH SERVICES ADMINISTRATION & MANAGEMENT |
|  |                                                           |

SCHOLARONE™  
Manuscripts



1  
2  
3 **PATIENT EXPERIENCE AND REFLECTIVE LEARNING (PEARL): A MIXED METHODS PROTOCOL**  
4 **FOR STAFF INSIGHT DEVELOPMENT IN ACUTE AND INTENSIVE CARE MEDICINE IN THE UK**  
5  
6

7 **AUTHORS**  
8

9 Corresponding author: Olivia Brookes  
10 University Hospitals Birmingham NHS Foundation Trust  
11 Research, Development & Innovation  
12 Office G15a Ground Floor, East Block, Heritage Building  
13 Mindelsohn Way,  
14 Birmingham, UK,  
15 B15 2PR  
16 Email: [Olivia.Brookes@uhb.nhs.uk](mailto:Olivia.Brookes@uhb.nhs.uk)  
17 Tel: 0121 3714205  
18  
19

20  
21 Dr Celia Brown  
22 Population Evidence and Technologies, University of Warwick, Warwick, UK  
23

24  
25 Dr Carolyn Tarrant  
26 Social Science Applied to Healthcare Improvement Research (SAPPHIRE) Group, University of Leicester,  
27 Leicester, UK  
28

29  
30 Prof Julian Archer  
31 Royal Australasian College of Surgeons, Melbourne, Australia  
32

33  
34 Mr Duncan Buckley  
35 Patient & Public Involvement Representative, Birmingham, UK  
36

37  
38 Mrs Lisa Marie Buckley  
39 Patient & Public Involvement Representative, Birmingham, UK  
40

41  
42 Dr Ian Clement  
43 Critical Care, Newcastle upon Tyne NHS Foundation Trust, Newcastle, UK  
44

45  
46 Felicity Evison  
47 Informatics Department, University Hospitals Birmingham NHS Foundation Trust, Birmingham, UK  
48

49  
50 Prof Fang Gao Smith  
51 Institute of Inflammation & Ageing, University of Birmingham, Birmingham, UK  
52

53  
54 Dr Chris Gibbins  
55 Acute Medicine, Newcastle upon Tyne NHS Foundation Trust, Newcastle, UK  
56

57  
58 Dr Emma Hayton  
59 Acute Medicine, University Hospitals Birmingham NHS Foundation Trust, Birmingham, UK  
60

61  
62 Dr Jennifer Jones  
63 Social Science Applied to Healthcare Improvement Research (SAPPHIRE) Group, University of Leicester,  
64 Leicester, UK  
65  
66

1  
2  
3  
4 Prof Richard Lilford  
5 Applied Health Research & Delivery, University of Warwick, Warwick, UK  
6  
7

8 Dr Randeep Mullhi  
9 Critical Care, University Hospitals Birmingham NHS Foundation Trust, Birmingham, UK  
10

11 Dr Greg Packer  
12 Critical Care, University Hospitals Birmingham NHS Foundation Trust, Birmingham, UK  
13  
14

15 Dr Gavin Perkins  
16 Critical Care Medicine, University of Warwick, Warwick, UK  
17  
18

19 Dr Jonathan Shelton  
20 Critical Care, Newcastle upon Tyne NHS Foundation Trust, Newcastle, UK  
21  
22

23 Dr Catherine Snelson  
24 Critical Care and Acute Medicine, University Hospitals Birmingham NHS Foundation Trust, Birmingham, UK  
25  
26

27 Dr Paul Sullivan  
28 Acute Medicine, Chelsea and Westminster NHS Trust, London, UK  
29  
30

31 Prof Ivo Vlaev  
32 Behavioural Science, University of Warwick, Warwick, UK  
33  
34

35 Daniel Wolstenholme  
36 NIHR CLAHRC Yorkshire and Humber, Sheffield, UK  
37  
38

39 Dr Stephen Wright  
40 Critical Care, Newcastle upon Tyne NHS Foundation Trust, Newcastle, UK  
41  
42

43 Prof Julian Bion  
44 Anaesthesia & Critical Care, University of Birmingham, Birmingham, UK  
45  
46

47 **Main paper current word count (excl. abstract, acknowledgements & references): 4985 words**  
48  
49  
50  
51  
52  
53  
54  
55  
56  
57  
58  
59  
60

## ABSTRACT

**Introduction:** Patient and staff experiences are strongly influenced by attitudes and behaviours, and provide important insights into care quality. Patient and staff feedback could be used more effectively to enhance behaviours and improve care through systematic integration with techniques for reflective learning. We aim to develop a reflective learning framework and toolkit for healthcare staff to improve patient, family and staff experience.

**Methods & Analysis:** Local project teams including staff and patients from the Acute Medical Units (AMUs) and Intensive Care Units (ICUs) of three NHS Trusts will implement two experience surveys derived from existing instruments: a continuous patient and relative survey; and an annual staff survey. Survey data will be supplemented by ethnographic interviews and observations in the workplace to evaluate barriers to and facilitators of reflective learning.

Using facilitated iterative co-design, local project teams will supplement survey data with their experiences of health care to identify events, actions, activities and interventions which promote personal insight and empathy through reflective learning. Outputs will be collated by the central project team to develop a reflective learning framework and toolkit which will be fed back to the local groups for review, refinement, and piloting. The development process will be mapped to a conceptual theory of reflective learning which combines psychological and pedagogical theories of learning, alongside theories of behaviour change based on COM-B (Capability, Opportunity and Motivation influencing Behaviour). The output will be a locally-adaptable workplace-based toolkit providing guidance on using reflective learning to incorporate patient and staff experience in routine clinical activities.

**Ethics & dissemination:** The PEARL Project has received ethics approval from the London Brent Research Ethics Committee (REC Ref 16/LO/224). We propose a national cluster randomised step-wedge trial of the toolkit developed for large-scale evaluation of impact on patient outcomes.

**Abstract word count (excl. key words): 292 words**

**Key words:** behaviour change, empathy, medical care, patient experience, quality improvement, reflective learning, staff experience

**ARTICLE SUMMARY: STRENGTHS AND LIMITATIONS OF THIS STUDY**

- PEARL links together theories of reflection and learning with those of behaviour change (COM-B) in a novel framework.
- Information from patient and staff surveys will provide insights into barriers to and facilitators of reflective and empathic behaviours.
- Observations by ethnographers will provide information about the capability, opportunity and motivation of staff to reflect effectively.
- Using co-design techniques, patients, relatives, and clinical staff will develop workplace-based interventions for stimulating reflection.
- To determine efficacy, the reflective learning toolkit will require testing subsequently in a prospective cluster-randomised clinical trial.

For peer review only

## INTRODUCTION

Patient and staff experiences provide important insights into care quality, but health systems have difficulty using these experiences to improve care, particularly those related to attitudes, behaviours and culture [1-5]. Reflective learning underpins approaches to improving non-technical skills, but the processes by which experiences are translated into reflection, and reflection into behavioural change are not well understood. We present a protocol for developing a toolkit to help frontline staff use patient and staff experiences to promote reflective learning, defined as an experiential process of personal insight development, in which one's own and others' experiences produce changes in behaviours.

### **1: Patient and staff experiences offer important insights into healthcare quality.**

Patient and staff experiences offer important insights into the quality of healthcare which complement organisational-level data on processes and outcomes [6-8]. Patient experience is an explicit outcome measure in the UK National Health Service (NHS) [9-10], and in the regulation of care quality [11]. All NHS Trusts are required to collect patient experience data through surveys [12, 13] and are available through patient complaints [14]. In the USA patients are surveyed through the Hospital Consumer Assessment of Healthcare Providers and Systems [15] while in Australia health organisations are required to involve consumers in accreditation processes [16].

Staff experience also provides insights into care quality: earlier action on staff concerns could have mitigated failings in care [17-18]. The NHS staff survey has been conducted annually since 2003 [19]. Patients and staff appear to share complementary insights into care quality: patient satisfaction is higher in hospitals in which nurses also reported better care quality [20, 21]. Patient and staff perceptions appear to offer both overlapping and unique insights into safety in hospital [22].

### **2: Patient and staff experience is strongly influenced by staff attitudes and behaviours.**

The NHS National Inpatient Survey asks respondents to rate their overall experience on a scale of zero ('very poor') to 10 ('very good'). In 2017, 50% of respondents rated their experience as 9 or above [12]. This indicates that there are substantial opportunities within the health system for 'learning from excellence' [23]. However, 'good' ratings by patients (as opposed to 'very good') may also disguise important opportunities for improvement [24]. A survey by Healthwatch England suggests that half of those experiencing substandard care do not report it [25]. Patients who respond to surveys with perfect ratings but with negative free text frequently describe lapses in staff behaviours and attitudes [26], such as communication, empathy, courtesy, consideration, compassion and patient focus. A study of patient-reported safety incidents found that 22% were related to communication failures alone [27], while a systematic review of patient complaints [28] judged that one third were related to staff-patient relationships. This may be an underestimate: at the Queen Elizabeth Hospital in Birmingham

1  
2  
3 local analysis shows that while non-technical aspects of patient care caused 37.7% of all issues  
4 raised, they were mentioned in 67.1% of all complaints (data on file). Non-technical issues are  
5 also likely drivers of staff dissatisfaction, as demonstrated by the 487,727 respondents to the  
6 NHS Staff survey in 2017 [29]. These data suggest that patient and staff experience, both  
7 positive and negative, provides an important opportunity for improvement through behaviour  
8 modification.  
9  
10  
11

### 12 **3: Patient and staff experience data are not used optimally to change behaviours.**

13  
14  
15 Using patient experience to improve care is not a trivial task [30]. Lapses in care are usually  
16 multifactorial, the product of interactions between the individual and the 'system'; but from the  
17 perspective of the patient, quality is largely about fiduciary relationships with specific  
18 individuals [31]. Trust Boards must contend with the competing priorities of hundreds of quality  
19 indicators each month, and may prioritise avoiding falling below a quality threshold rather than  
20 achieving higher values of a performance standard once met. A review in 2012 which examined  
21 how hospitals had used research from the UK's national in-patient survey concluded that 'simply  
22 providing hospitals with patient feedback does not automatically have a positive effect on  
23 quality standards' [32]. Even Trusts with a tradition of collecting and using patient survey data  
24 may struggle to convert these data into tangible improvements [33]. In a study of 50 clinical  
25 and managerial staff in three English hospitals, Sheard et al [34] found that the collection of  
26 patient experience feedback was a 'self-perpetuating industry' conducted 'at the expense of  
27 pan-organizational learning or improvements'; ward staff had difficulty using patient feedback.  
28 They concluded that 'macro and micro prohibiting factors come together in a perfect storm  
29 which [prevent] improvements being made'. In a systematic review Gleeson reported that  
30 'Patient experience data were most commonly...used to identify small areas of incremental  
31 change to services that do not require a change to clinician behaviour' [35]. Institutional  
32 commitment to using patient feedback may not be reflected at the front-line, where single  
33 individuals can adversely influence other members of staff [36]. Conversely, frontline staff can  
34 struggle to get their voices heard at senior levels: one of the recommendations of the Mid Staffs  
35 enquiry [17] has been to establish 'Freedom To Speak Up Guardians' in all NHS Trusts to ensure  
36 that staff concerns are heard and acted on [37]. These findings indicate that changing  
37 behaviours requires a change in underlying attitudes at individual, group and organisational  
38 levels. How is this best achieved?  
39  
40  
41  
42  
43  
44  
45  
46  
47  
48

### 49 **4: Changing attitudes and behaviours involves learning through reflection.**

50  
51 Behavioural modification is a key societal preoccupation [38]. A large number of techniques  
52 exist: a proposed behaviour change taxonomy has so far identified 93 different interventions  
53 [39-40]. However, evidence supporting the primacy of one technique over another is not strong  
54 [41-42]. Many interventions involve personal insight development through reflection, but few  
55 behaviour change theories express this explicitly. One which does is the COM-B model [43]  
56 which assimilates nineteen behaviour change theories into a single framework in which the  
57 Behaviour of interest has three determinants, each with two subtypes: Capability (physical and  
58  
59  
60

1  
2  
3 psychological); **O**pportunity (physical and social); and **M**otivation (reflective and automatic).  
4 The automatic subtype for Motivation relies on heuristics, is engaged in conditions of  
5 complexity and stress, and maps to Daniel Kahneman's 'System 1' thinking [44]. The reflective  
6 component is slower, more effortful and analytical ('System 2' thinking). These two subtypes of  
7 motivation map to the 'peripheral' and 'central' routes described in the Elaboration Likelihood  
8 Model of Persuasion [45-46]. Factors influencing motivation (particularly the automatic subtype)  
9 are summarised in the acronym MINDSPACE: Messenger, Incentives, Norms, Defaults, Salience,  
10 Priming, Affect, Commitment and Ego [47]. As the behaviour of interest here is reflection itself,  
11 we need to consider both the automatic factors which influence the desire to reflect and the  
12 more effortful elements of 'reflecting on the need for reflection'. We consider next how  
13 theories of reflection as a behaviour link to theories of reflective learning as a tool for personal  
14 insight development.  
15  
16  
17  
18  
19

20  
21 How does reflection stimulate learning? Kolb presented reflection as a four-stage model:  
22 experience; observation; analysis; and recalibration [48]. Schon described reflection 'in-action',  
23 and 'on-action' [49]. Others emphasise the importance of an emotional component to reflective  
24 learning [50], including the "disorientating dilemma" [51], the realisation that there is a gap  
25 between desired and actual behaviours. Sandars describes reflection as a metacognitive process  
26 that creates a greater understanding of self and situation to inform future actions [52]: looking  
27 back to look forward. This involves a transition from tacit to explicit knowledge [53], in which  
28 socially-acquired norms of behaviour [54] are modified either through individual reflection or,  
29 more powerfully, through group activities [55]. The process shares similarities with Broadwell's  
30 four stages of competence [56]: unconscious incompetence (unaware of problem), conscious  
31 incompetence (data received, now being processed), conscious competence (using data to  
32 improve or disseminate excellence), and unconscious competence (effortless excellence).  
33 Effective reflection appears to involve making this transition, while recalibrating and  
34 reinterpreting experience in-action and on-action. We present a possible model linking theories  
35 of reflective learning to theories of behaviour change in Figure 1.  
36  
37  
38  
39  
40  
41

#### 42 **Figure 1: Conceptual model linking theories of behaviour change to those of reflective learning**

#### 43 **5: Reflective learning could be deployed more effectively to improve care quality.**

44  
45  
46  
47 First described by Dewey in 1933 [57], reflective learning is now a mandatory tool in the  
48 education of health professionals. In the UK, the General Medical Council and others define  
49 reflective practice as '*the process whereby an individual thinks analytically about anything*  
50 *relating to their professional practice with the intention of gaining insight and using the lessons*  
51 *learned to maintain good practice or make improvements where possible'*. They state that  
52 '*Reflecting on ..... experiences is vital to personal wellbeing and development, and to improving*  
53 *the quality of patient care*' [58]. Reflection is incorporated in all healthcare postgraduate  
54 training programmes in the UK, and evidence of reflecting on patient and colleague ('multi-  
55 source') feedback is required for physicians' continuing professional development and  
56 revalidation.  
57  
58  
59  
60



1  
2  
3 However, despite the widespread acceptance of reflection as a tool for self-improvement, its  
4 utility in enhancing performance is uncertain [59-60], as is the efficacy of using patient  
5 experience surveys to promote reflection [61]. People are biased towards favourable events  
6 and judgements [62], and doctors tend to reject the validity of adverse patient feedback [63].  
7 Undesirable information is processed as a threat with physiological correlates, which can  
8 impede learning [64]. Effective reflection requires the emotional strength and capacity to take a  
9 critical view of one's skills, attitudes and behaviours, which may be lacking amongst poor  
10 performers [65]. In the UK, doctors are concerned that honest reflections documented in  
11 personal portfolios might incriminate them in a court of law [66].  
12  
13  
14  
15  
16

17 Communication skills training should provide an opportunity for reflection. However, a review  
18 of 243 studies of teaching communication skills to medical undergraduates identified only 16  
19 interventional studies and only two of these reported behavioural outcomes [67], making it  
20 difficult to determine whether 'communication skills' are sufficient, or even if such courses are  
21 effective at all. At postgraduate level, the effects of communication skills training appear to be  
22 weak or evanescent [68-73], and in one RCT were associated with worse depression amongst  
23 patients in the intervention group [74].  
24  
25  
26

27 By contrast, interventions focused on engaging staff in workplace-based activities which  
28 improve teamworking [75], insight, patient-centred care and empathy may be more effective  
29 and more durable [76-87]. The Cleveland Clinic offers short videos on empathy [88], and similar  
30 internet-based resources demonstrate how emotion may be engaged to stimulate reflection  
31 and promote mutual understanding [89-90]. For reflective learning to improve patient and staff  
32 experience, it must do so by changing 'hearts and minds'. This is the focus of our research.  
33  
34  
35  
36

### 37 **AIMS & OBJECTIVES:**

38  
39 We aim to develop methods for using patient and staff experiences to promote effective  
40 reflection and patient-centred care.  
41  
42  
43

44 Specific objectives include:

- 45 1. Developing a programme theory linking experiential feedback to reflective learning and  
46 behaviour change.
- 47 2. Establishing surveys for recording patient and staff experience.
- 48 3. Determining attitudes to, and uses of, patient and staff experience data.
- 49 4. Determining attitudes to, and techniques for, reflective learning.
- 50 5. Mapping factors which influence reflective learning to the COM-B model of behaviour  
51 change.
- 52 6. Developing and piloting methods for incorporating effective reflection in routine  
53 practice.  
54  
55  
56  
57  
58  
59  
60

## OUTPUTS:

The primary output will be guidance on effective reflective learning, in the form of a framework and toolkit.

Secondary outputs include data on patient and staff experience, how staff use these data to promote reflective learning, and how staff propose to include reflective learning in routine activities in the workplace.

## STUDY DESIGN:

This is a three-year mixed-methods observational study using patient and staff co-design techniques.

In subsequent research, we intend to evaluate the utility of the reflective learning toolkit in a cluster randomised step-wedge trial.

## PARTICIPANTS AND SETTING:

Participants include clinical and managerial staff and patients and relatives from the three acute medical units (AMUs) and five intensive care units (ICUs) of three large urban hospital Trusts: the Queen Elizabeth Hospital Birmingham, Heartlands Hospital Birmingham, and Newcastle upon Tyne NHS Foundation Trust (Royal Victoria Infirmary and Freeman Hospitals). This will provide access to at least 100,000 acute admissions over two years, from which we anticipate surveying around 25% with a response rate of 30%, providing around 7,500 returned questionnaires for analysis.

Each AMU and ICU will have a project group, and these will come together as site teams lead by a senior clinician. Meetings will be chaired by a non-executive director. Local project teams will be asked to ensure inclusion of at least two patient representatives. The research will be directed by the central project team which includes patient representatives, clinicians, social scientists, a behavioural psychologist, an educationalist and a co-design expert. Project governance will be overseen by an independent project steering committee.

The study is located in acute and emergency care settings for several reasons: acutely ill patients represent at least 50% of all hospitalised NHS patients; acute illness accentuates sensitivity to staff behaviours; emergency care creates particular demands on the non-technical skills of staff; and both environments demand a high degree of multidisciplinary team working. Intensive care units offer a much higher ratio of nurses and doctors to patients than AMUs which provides an opportunity for comparison.

## DEFINITIONS AND PROGRAMME THEORY:

As stated above, we define reflective learning as an experiential process of personal insight development, in which one's own and others' experiences are used to produce a change in behaviours. The PEARL programme theory (figure 1) integrates theories of reflective learning with theories of behaviour change, as described in the introduction, using the approach recommended by the MRC for the development and evaluation of complex interventions [91]. Our target behaviour is engagement in effective reflection, with consequential acquisition of insight, behavioural change and improvements to practice/standards of care. The COM-B model [43] will be used to characterise Capability, Opportunity, and Motivation to engage in individual and group reflection, and this analysis will inform the development of tools to support the embedding of reflection in practice. This will be facilitated through the use of the PEARL-formatted COM-B diagram (figure 2) as a diagnostic tool. Diverse activities involving reflection in-action, on-action, solitary and group, can be documented in the box to the left of the diagram. The boxes on the right permit recording of facilitators or inhibitors of the three determinants of behaviour – motivation, opportunity and capability – and their subtypes. We will adapt the programme theory in the light of experience as the project proceeds.

### Figure 2: PEARL diagnostic framework using the COM-B model

## METHODS AND ANALYSIS:

### Figure 3: PEARL Project Gantt Chart

The PEARL project will run for a 3 year period from October 2016-September 2019. Project workstreams and activities are displayed in figure 3.

#### Workstream 1: Project Set-up

We will establish local site project groups as 'communities of practice' [92-93], based on our earlier work showing that clinicians disengaged by multiple quality improvement policy initiatives are more motivated when they have professional ownership of the process and when performance feedback is linked to particular patients or events [94-95]. Local project groups will include a non-Executive Trust Director, patient representatives, and AMU and ICU clinical and managerial staff. Opportunities for feedback and reflection will be identified and local arrangements for project delivery agreed. This includes the process for acquiring, analysing, reporting and benchmarking of data from surveys and local performance and quality data. Local project teams will be asked to hold meetings once every two months to review project outputs, encourage team reflection (for example through existing meetings, team briefs and formal reports) and consider methods for incorporating feedback in routine practice.

## Workstream 2: Experiential data collection

Patient and staff experience data collected routinely in the NHS do not enable responses to inform practice at unit level, and usually do not offer or report free-text responses. Duplication of questions between surveys is common; none simultaneously addresses issues of communication, clinical care, patient safety, satisfaction, and response to feedback. We will therefore select previously validated questions across different questionnaires to create a single, parsimonious survey for patients and relatives, and a separate survey for staff. Both questionnaires will be anonymous, paper-based, permit optical character recognition, employ a 5-point scale for rating agreement, and offer free-text for additional information. Questionnaires will be accompanied by a reply-paid envelope and covering letter. Survey forms will be returned to the central project team to be digitised, analysed, and reported to each Trust's local project lead. Free-text responses will be transcribed and analysed using NVivo. Response rates will be determined from denominator data for each survey group.

Patient & Relative Experience Survey: the questionnaire will be developed from the Family Satisfaction Survey (FS-ICU) [96-98], the Adult In-Patient Survey [12], and the Friends and Family Test (F&FT) [13]. The questionnaire will be offered continuously throughout the project to patients and relatives who have spent > 24 hrs in the AMU , and to all relatives of patients in the ICU > 48hrs. Different methods of distribution will be trialled by the individual teams before definitive implementation. Denominator data will be collected from Trust admission databases to calculate response rates: a response rate of around 30% is anticipated (target 7,500 responses). A covering letter will be provided with the questionnaire, suitably adapted for bereaved families. Performance-importance plots will be derived from the % 'excellent' ratings versus the correlation of each item with the overall weighted satisfaction score (WSS).

Staff Experience Survey: The aim of this survey is to gain insights into individual, contextual and organisational influences on staff behaviour, and attitudes to the use of patient experience for reflection and improvements in care. Questions will be derived from the following validated questionnaires: NHS Staff Core Survey [19], the Staff F&FT [99], Hospital Survey on Patient Safety Culture [100], Teamwork and Safety Climate Survey [101], GMC Trainee Survey [102], and the Self-Reflection and In-Sight Scale (SIRS)[103]. Additional questions will be developed by the central project team to investigate attitudes towards the use of feedback for reflection and the potential for biases related to anxieties about transparency and honesty. Local project teams will be invited to participate in a modified Delphi method to prioritise questions for the final set.

The staff survey will be offered over a two month period during year 2 and year 3 of the project. A response rate of 50% is anticipated with a target of 600 staff responses during each round of the survey. Free-text will be transcribed and analysed using NVivo. Results will be collated in unit-specific reports benchmarked against aggregated data for the group as a whole, and where this is available, against national performance reports.

1  
2  
3 The results from both surveys will be presented to the AMUs and ICUs in the form of  
4 standardised reports showing the proportion of respondents selecting each level of strength of  
5 agreement with each statement. For the patient and relative satisfaction survey we will provide  
6 performance-importance plots which will show the relationship between the level of  
7 satisfaction with each item in the questionnaire, and how that particular item influences overall  
8 satisfaction. Free text will be encoded for thematic analysis using NVivo, and presented to the  
9 staff in each unit. As the main purpose of the surveys is to stimulate reflective learning by the  
10 local teams, all free text feedback will be returned to the local teams. If staff are named in this  
11 feedback the names will be redacted from the full reports, but made known to the project leads.  
12 If allegations relating to patient safety or staff probity were to be made, these will be reported  
13 unredacted to the Non-Executive Director chairing the local project team.  
14  
15  
16  
17  
18

### 19 **Workstream 3: Ethnography**

20  
21  
22 This workstream has two phases. *Phase 1* will employ site visits, interviews with around 40  
23 front-line and managerial staff, and workplace-based observations of up to five days per  
24 participating site, to describe the current use of patient experience data, to explore options for  
25 the feedback of data as part of the reflective learning process, and to investigate barriers to and  
26 opportunities for workplace-based reflective learning. *Phase 2* will focus on observations of co-  
27 design workshops, and of the implementation and piloting of components of the toolkit in  
28 practice. Findings from both phases will be used to inform the development of the reflective  
29 learning framework and toolkit in workstream 4.  
30  
31  
32  
33

34 Observations and interviews will be conducted by ethnographers (social scientists) experienced  
35 in making observations in the clinical environment. Publicly visible information sheets  
36 describing the project will be provided in clinical areas. Informed written consent will be  
37 obtained for formal interviews. No staff identifiers (other than professional status/occupational  
38 group) will be collected. We expect interviews to be approximately 1 hour in duration but  
39 appreciate this is likely to vary by individual.  
40  
41  
42  
43

44 Analysis of data will occur over the course of the fieldwork period. Interviews and field notes  
45 will be transcribed verbatim and coded using NVivo. Analysis will draw on elements of grounded  
46 theory, in particular, the constant comparative approach [104] and will remain grounded in the  
47 data. We will use techniques developed through our experience of conducting large scale  
48 ethnographic studies to enable us to manage the large amounts of data generated, and to move  
49 quickly from data to interpretation. These include regular debriefs and the production of  
50 summaries of data by site and across sites, organised by research questions and emerging  
51 themes.  
52  
53  
54

### 55 **Workstream 4: Co-Design and Piloting of the Reflective Learning Framework & Toolkit**

56  
57  
58 'Co-design' or 'co-production' involves service users and providers working together using a  
59 structured approach to create improvements[105]. Co-design has been used previously in  
60

exploring patient feedback [106]. We will use an adapted version [107] of the British Design Council's 'double diamond' approach, of 'Discover, Define, Develop and Deliver' in which the initial problem ('How to promote effective reflection') is subject to two rounds of divergent and convergent thinking, first to refine the problem, and second to develop solutions. The co-design workshops will use creative co-production, which has collective making [108] as its central approach to ensure meaningful engagement and creative responses from all participants.

Workstream 4 will therefore consist of 13 co-design meetings (Table 1). The co-design meetings will consist of four plenary workshops for the whole collaboration over the period of the project; and three local meetings in year 2 for each local project team conducted on-site at each Trust (nine local meetings in total). Attendees will include patients and relatives, clinical staff, and the non-executive directors. The co-design elements will be developed in collaboration with the researchers from Lab4Living, the Art and Design Research Centre, Sheffield Hallam University. Co-design aims and outputs are shown in Table 1. We anticipate that while the teams are becoming established, the process of reflection may be accompanied by release of emotions related to personal experiences. Project team members have expertise in managing emotionally challenging situations, and will ensure that individual experiences are channelled into creative outputs by the local teams. In this respect, reflection will have both therapeutic and educational value for the project as a whole.

Following workshop 3, local project teams will be invited to develop behavioural specifications for embedding a maximum of three interventions into routine clinical activities. Teams will use COM-B as an analytical tool (figure 2) to identify gaps in reflective practice which can be addressed through these behavioural specifications. The teams will present their experiences of selecting, specifying and piloting interventions in the final plenary workshop 4.

| <b>Event</b>    | <b>Participants</b>                                                                    | <b>Aims or activity</b>                                                                                                          |
|-----------------|----------------------------------------------------------------------------------------|----------------------------------------------------------------------------------------------------------------------------------|
| Workshop 1      | All project participants, central location                                             | Discuss the background to the project and review or modify the proposed methodology                                              |
| Workshop 2      | All project participants, central location                                             | Co-design approach will be introduced to the local project teams                                                                 |
| Site meetings 1 | Local project team, project core team, design team, meeting at each of the three sites | Describe 'reflective moments' – occasions when an event stimulated personal insight development                                  |
| Site meetings 2 |                                                                                        | Discuss attitudes to reflection and how habits and preferences shape response to events and the capacity for insight development |
| Site meetings 3 |                                                                                        | Discuss reflective opportunities – how reflection can be incorporated in routine activities in the workplace                     |
| Workshop        | All project participants, central                                                      | Structure and content of the toolkit will be                                                                                     |



|               |                                            |                                                                                                               |
|---------------|--------------------------------------------|---------------------------------------------------------------------------------------------------------------|
| 3             | location                                   | provisionally outlined, and a set of candidate prototype interventions (tools and techniques for reflection). |
| Workshop<br>4 | All project participants, central location | Teams present experience of developing & piloting interventions.                                              |

Toolkit Development: Outputs from each of the 13 co-design meetings will be documented by the ethnographers and members of the core project team and will feed into toolkit development. The members of the core project team will collate their findings from the co-design meetings and cross-reference them with ethnographic findings from site visits to produce short guidance notes and resource materials under the following headings: Aims of the toolkit; What is reflection?; Why reflect?; How to reflect effectively; Reflection in daily practice; Stimulating reflection in others; Evidencing reflection; and Organisational support for reflection. The Reflective Learning Framework and Toolkit will be evaluated locally by the participating units. Staff will be asked to offer their views on the specific interventions. This feedback will be incorporated in the final version.

### Patient & Public Involvement

The PEARL project puts patients and relatives at the centre of the research and they were involved at inception in the initial design, contributing as full collaborators. PEARL is a developmental project which uses co-design to develop the reflective learning framework. To develop the framework, patients and relatives from the acute medical units and intensive care units of four hospitals in three Trusts will work together collaboratively in 12 facilitated workshops as well as being full members of each local project team. They are helping to design the patient and staff surveys, and have informed decisions about the extent to which PPIs can contribute to this type of co-design process. They are co-authors in publications and will participate in dissemination activities.

### DISCUSSION

Patient experience data demonstrate important opportunities to improve the quality of healthcare, particularly those relating to attitudes, behaviours and staff-patient relationships. However, these data are not used optimally by organisations or frontline staff to make improvements. Reflective learning should hold the key to converting experience into action, but there is little evidence about how reflection can most effectively be incorporated in routine clinical practice for individuals and teams.

The PEARL project aims to develop a framework and toolkit to support effective reflection in the workplace. The apparent simplicity of this aim disguises the underlying complexity of the relationships linking the various theories of reflection, learning and behaviour change, as demonstrated in the introduction and in figure 1. These theories show that reflective learning –



1  
2  
3 which has almost achieved the status of received wisdom in medical education – is itself a form  
4 of behaviour subject to multiple influences, summarised in the COM-B model. Individuals and  
5 groups vary in their capacity, opportunity and motivation to reflect, and to do so in a manner  
6 which promotes personal growth. And having reflected effectively, they must then use these  
7 insights to drive changes in behaviours at the ‘sharp end’ of medicine as well as at institutional  
8 level. It is perhaps not surprising that health systems have difficulty using patient and staff  
9 experience data to improve care quality.  
10  
11  
12

13  
14 Most interactions between patients and health care staff are associated with positive  
15 experiences. This is an asset in terms of reflection and behaviour modification, for two reasons.  
16 First, there are many excellent role models available, and a systematic approach for identifying  
17 and learning from them can help others to acquire similar skills. Second, it takes courage and  
18 resilience to cope with the discovery of imperfections, and this may be easier if the setting is  
19 one which prioritises learning from excellence [23].  
20  
21  
22

23 Emotional engagement is important in engaging people’s attention and in promoting empathy,  
24 but not at the price of preventing analytical thinking: the Elaboration Likelihood Model of  
25 Persuasion provides some evidence for the value of analysis over heuristics in sustained change  
26 in attitudes and beliefs [46]. It may be easier to accept and improve deficiencies in technical  
27 skills than in attitudes and behaviours, because technical issues allow us to focus externally on  
28 the tool, while non-technical issues reflect on our inner character and personality, and evidence  
29 of deficiencies is therefore more threatening. Models of reflective learning may help to  
30 ‘externalise’ behaviours, providing enough distance to allow constructive analysis. The process  
31 of self-critiquing may also be made more palatable – that is, enhancing the recipient’s resilience  
32 - by focusing initially on positive aspects of feedback.  
33  
34  
35  
36  
37

38 Potential limitations of the co-design process involve self-selection of participants naturally  
39 predisposed to favour reflection rather than sceptics. We will mitigate this by considering  
40 reflective personae when developing the interventions. A limitation of the patient survey is that  
41 respondents may have difficulty distinguishing locations (for example acute medical units versus  
42 ordinary wards). The accompanying patient information sheets will explain the the survey is  
43 focused on the initial period of care immediately following admission through the emergency  
44 department.  
45  
46  
47  
48

49 The PEARL project will gather important insights into the ‘black box’ of reflective learning. The  
50 framework and toolkit will use patient and staff experience to support workplace-based  
51 effective reflection and improvement during routine clinical practice for individuals and teams.  
52 Our intent in subsequent research is to evaluate the logic model (figure 1) and the toolkit in a  
53 mixed-methods step-wedge cluster randomised trial. The precise form this will take will  
54 become apparent in the final year of the project; it will be classed as a complex intervention,  
55 and the workstreams described above will test the methodologies to be deployed during larger  
56 scale roll-out.  
57  
58  
59  
60

### **ETHICS & DISSEMINATION:**

The PEARL Project has received ethics approval from the London Brent Research Ethics Committee (REC Ref 16/LO/224). Implied consent will apply to the return of completed questionnaires. Informed consent will be sought from participants of ethnographic interviews. Research findings will be submitted for publication by scientific journals and presentation at conferences in the disciplines of patient safety, health services research, implementation science, and intensive care medicine. We will also propose a national cluster randomised step-wedge trial of the toolkit for large-scale evaluation of impact on patient outcomes. We will offer this as a resource for national multidisciplinary training programmes through our partner organisations in acute and intensive care medicine, nursing and allied health professional programmes.

### **FUNDING**

PEARL is funded by the NIHR HS&DR programme (Ref 14/156/23).

### **ACKNOWLEDGEMENTS**

The PEARL project team are grateful to the study Steering Committee for their invaluable support; Prof Rebecca Lawton, Mr Harry Turner, Prof James Neuberger, and Prof Stephen Brett. Dr Remi Bec and Cheryl Grindell were instrumental in the planning of the codesign workshops.

### **CONTRIBUTORSHIP STATEMENT**

Olivia Brookes as project manager and collaborator will manage the day to day running of the project under the CI, managing governance and study set-up, processing, analysis and presentation of study findings.

Celia Brown has a strong academic background in pedagogic research at the University of Warwick, and is the lead for medical education and reflection in PEARL, workstream 4. She will contribute to our understanding of how reflection is used to achieve learning.

Carolyn Tarrant is Associate Professor in Health Psychology and Joint Group Lead of the SAPPHIRE group at the University of Leicester. She is the lead for the ethnographic workstream (workstream 3), directing a group of ethnographers making original observations of practice.

Julian Archer is Professor in Medical Education Research at the University of Plymouth. He is our expert on multisource feedback, advising on how to convert feedback into effective reflection.

Mr & Mrs Buckley are patient and relative representatives with extensive experience of the totality of the emergency care pathway. They will provide insights into patient-staff interactions.

1  
2  
3 Ian Clement is an intensive care consultant at Newcastle Upon Tyne NHS Trust. He will advise  
4 on practical aspects of reflective learning and will help co-design the reflection toolkit.  
5  
6

7 Felicity Evison is the statistician for the project and will oversee the quantitative analysis from  
8 the patient and staff survey instruments.  
9  
10

11 Fang Gao Smith is the local lead for the intensive care unit at Heartlands Hospital. She will  
12 advise on practical aspects of reflective learning and will help co-design the reflection toolkit.  
13  
14

15 Chris Gibbins is consultant in Acute Medicine at Newcastle Upon Tyne NHS Trust. He will advise  
16 on practical aspects of reflective learning and will help co-design the reflection toolkit.  
17  
18

19 Emma Hayton is the Acute Medicine lead at Heartlands Hospital. She will advise on practical  
20 aspects of reflective learning and will help co-design the reflection toolkit.  
21  
22

23 Jennifer Jones is the ethnography research fellow, organising and collating information from  
24 interviews and near-patient observations, and responsible for the analysis of qualitative data.  
25  
26

27 Richard Lilford is the PEARL methodologist advising on study design.  
28  
29

30 Randeep Mullhi is the local lead for the intensive care unit at the Queen Elizabeth Hospital. She  
31 will advise on practical aspects of reflective learning and will help co-design the reflection  
32 toolkit.  
33  
34

35 Greg Packer is the trainee representative for the project, also part of the intensive care local  
36 team at Queen Elizabeth Hospital. He will analyse data from the GMC survey.  
37  
38

39 Gavin Perkins is Professor of Intensive Care Medicine at the University of Warwick, and is the  
40 lead for debriefing and feedback in PEARL.  
41  
42

43 Jonathan Shelton is an intensive care consultant at Newcastle Upon Tyne NHS Trust. He will  
44 advise on practical aspects of reflective learning and will help co-design the reflection toolkit.  
45  
46

47 Catherine Snelson is the Acute Medicine lead at the Queen Elizabeth Hospital. She will advise  
48 on practical aspects of reflective learning and will help co-design the reflection toolkit.  
49  
50

51 Paul Sullivan represents the Society of Acute Medicine in PEARL, and provides expertise in  
52 quality improvement in acute medicine.  
53  
54

55 Ivo Vlaev is Professor of Behavioural Sciences at the University of Warwick. He advises the  
56 PEARL project on behaviour change theory and techniques, and will lead this aspect of the  
57 toolkit development.  
58  
59  
60

1  
2  
3 Daniel Wolstenholme is the co-design facilitator who will lead the co-design workshops and help  
4 with the design of the toolkits.  
5  
6

7 Stephen Wright is the senior intensive care consultant at Newcastle Upon Tyne NHS Trust. He  
8 will advise on practical aspects of reflective learning and will help co-design the reflection  
9 toolkit. He also advises the project on the family satisfaction survey.  
10  
11

12 Julian Bion is the Chief Investigator responsible for the overall design, management and conduct  
13 of the study with extensive experience in health services research, pedagogic development, and  
14 intensive care medicine.  
15  
16

### 17 **COMPETING INTEREST STATEMENT**

18 None declared.  
19  
20  
21  
22

### 23 **REFERENCES**

- 24 1. Dixon-Woods M, Baker R, Charles K, et al. Culture and behaviour in the English National  
25 Health Service: overview of lessons from a large multimethod study. *BMJ Qual Saf.* 2014  
26 Feb;23(2):106-15. doi: 10.1136/bmjqs-2013-001947. [Epub 2013 Sep 9].
- 27 2. Sheard L, Marsh C, O'Hara J, et al. The patient feedback response framework–  
28 understanding why UK hospital staff find it difficult to make improvements based on  
29 patient feedback: a qualitative study. *Social Science & Medicine* 2017;178: 19-27.
- 30 3. Mannion R, Davies H. Understanding organisational culture for healthcare quality  
31 improvement. *BMJ.* 2018 Nov 28;363:k4907. doi: 10.1136/bmj.k4907.
- 32 4. Martin GP, Aveling EL, Campbell A, et al. Making soft intelligence hard: a multi-site  
33 qualitative study of challenges relating to voice about safety concerns. *BMJ Qual Saf.*  
34 2018 Sep;27(9):710-717. doi: 10.1136/bmjqs-2017-007579. [Epub 2018 Feb 19]
- 35 5. Armstrong N, Brewster L, Tarrant C, et al. Taking the heat or taking the temperature? A  
36 qualitative study of a large-scale exercise in seeking to measure for improvement, not  
37 blame. *Soc Sci Med.* 2018 Feb;198:157-164. doi: 10.1016/j.socscimed.2017.12.033.  
38 [Epub 2018 Jan 2]
- 39 6. World Health Organization. The world health report 2000. Health systems: improving  
40 performance. WHO 2000.
- 41 7. Institute of Medicine. Crossing the quality chasm: a new health system for the 21st  
42 century. National Academy Press, 2001.
- 43 8. Doyle C, Lennox L, Bell D. A systematic review of evidence on the links between patient  
44 experience and clinical safety and effectiveness. *BMJ Open* 2013;3:e001570.  
45 doi:10.1136/bmjopen-2012-001570
- 46 9. Darzi A. High Quality Care For All. NHS Next Stage Review Final Report. Department of  
47 Health 2008.
- 48 10. NHS Outcomes Framework, accessed Feb 2019: [https://digital.nhs.uk/data-and-](https://digital.nhs.uk/data-and-information/publications/ci-hub/nhs-outcomes-framework)  
49 [information/publications/ci-hub/nhs-outcomes-framework](https://digital.nhs.uk/data-and-information/publications/ci-hub/nhs-outcomes-framework)  
50  
51  
52  
53  
54  
55  
56  
57  
58  
59  
60

11. Care Quality Commission, accessed Feb 2019: <https://www.cqc.org.uk/file/151928>
12. Care Quality Commission, Adult In-Patient Survey 2017, accessed Feb 2019:  
<http://www.cqc.org.uk/publications/surveys/adult-inpatient-survey-2016>
13. NHS Friends and Family Test, accessed Feb 2019. <https://www.england.nhs.uk/fft/>
14. NHS Digital, Data on Written Complaints in the NHS, accessed Feb 2019:  
<https://digital.nhs.uk/data-and-information/publications/statistical/data-on-written-complaints-in-the-nhs>
15. HCAHPS, accessed Feb 2019: <https://www.hcahpsonline.org/>
16. Australian Commission on Safety and Quality in Health Care. National safety and quality health service (NSQHS) standards. Sydney: ACSQHC; 2012.
17. Francis R. Report of the Mid Staffordshire NHS Foundation Trust Public Inquiry. London. The Stationery Office 6 February 2013
18. Gosport Enquiry 2018, accessed Feb 2019:  
<https://www.gosportpanel.independent.gov.uk/panel-report/>
19. NHS Staff Survey , accessed Feb 2019:  
<http://www.nhsstaffsurveys.com/Page/1056/Home/NHS-Staff-Survey-2018/>
20. Aiken LH, Sermeus W, Van den Heede K, et al. Patient safety, satisfaction, and quality of hospital care: cross sectional surveys of nurses and patients in 12 countries in Europe and the United States. *BMJ*. 2012 Mar 20;344:e1717. doi: 10.1136/bmj.e1717.
21. Flott K, Darzi A, Mayer E. Care pathway and organisational features driving patient experience: statistical analysis of large NHS datasets. *BMJ Open* 2018;8:e020411. doi: 10.1136/bmjopen-2017-020411
22. Lawton R, O'hara J K, Sheard L, et al. Can staff and patient perspectives on hospital safety predict harm-free care? An analysis of staff and patient survey data and routinely collected outcomes. *BMJ Qual Saf*, 2015;24(6), 369-376.
23. Learning from Excellence, accessed Feb 2019: <https://learningfromexcellence.com/>
24. Burt J, Newbould J, Abel G et al. Investigating the meaning of 'good' or 'very good' patient evaluations of care in English general practice: a mixed methods study. *BMJ Open*. 2017 Mar 2;7(3):e014718.
25. Healthwatch 2014. Suffering in silence: Listening to consumer experiences of the health and social care complaints system. *Healthwatch*, October 2014
26. Gallan AS, Girju M, Girju R. Perfect ratings with negative comments: Learning from contradictory patient survey responses. *Patient Experience Journal* 2017; 4(3): 15-28.
27. O'Hara JK, Reynolds C, Moore S, et al. What can patients tell us about the quality and safety of hospital care? Findings from a UK multicentre survey study. *BMJ Qual Saf*. 2018 Sep;27(9):673-682. doi: 10.1136/bmjqs-2017-006974. [Epub 2018 Mar 15]
28. Reader TW, Gillespie A, Roberts J. Patient complaints in healthcare systems: a systematic review and coding taxonomy. *BMJ Qual Saf* 2014;23:678–89.
29. NHS Staff survey 2017, accessed Feb 2019:  
<http://www.nhsstaffsurveys.com/Page/1064/Latest-Results/2017-Results/>
30. Flott KM, Graham C, Darzi A, at al. Can we use patient-reported feedback to drive change? The challenges of using patient-reported feedback and how they might be addressed. *BMJ Qual Saf* 2016; 26(6): 502 to 507

- 1
  - 2
  - 3
  - 4
  - 5
  - 6
  - 7
  - 8
  - 9
  - 10
  - 11
  - 12
  - 13
  - 14
  - 15
  - 16
  - 17
  - 18
  - 19
  - 20
  - 21
  - 22
  - 23
  - 24
  - 25
  - 26
  - 27
  - 28
  - 29
  - 30
  - 31
  - 32
  - 33
  - 34
  - 35
  - 36
  - 37
  - 38
  - 39
  - 40
  - 41
  - 42
  - 43
  - 44
  - 45
  - 46
  - 47
  - 48
  - 49
  - 50
  - 51
  - 52
  - 53
  - 54
  - 55
  - 56
  - 57
  - 58
  - 59
  - 60
31. Scott DAH, Grant SM. A meta-ethnography of the facilitators and barriers to successful implementation of patient complaints processes in health-care settings. *Health Expect*. 2018 Apr;21(2):508-517.
32. DeCourcy A, West E, Barron D. The National Adult Inpatient Survey conducted in the English National Health Service from 2002 to 2009: how have the data been used and what do we know as a result? *BMC Health Serv Res* 2012;12:71.
33. Lee R, Baeza JI, Fulop NJ. The use of patient feedback by hospital boards of directors: a qualitative study of two NHS hospitals in England. *BMJ Qual Saf* 2018;27:103-109.
34. Sheard L, Peacock R, Marsh C et al. What's the problem with patient experience feedback? A macro and micro understanding, based on findings from a three-site UK qualitative study. *Health Expectations*, 22 (1). pp. 46-53.
35. Gleeson H, Calderon A, Swami V, et al. Systematic review of approaches to using patient experience data for quality improvement in healthcare settings. *BMJ Open*. 2016 Aug 16;6(8):e011907. doi: 10.1136/bmjopen-2016-011907.
36. Sheard L, Marsh C, O'Hara J, et al. Exploring how ward staff engage with the implementation of a patient safety intervention: a UK-based qualitative process evaluation. *BMJ Open*. 2017 Jul 13;7(7):e014558. doi: 10.1136/bmjopen-2016-014558.
37. Freedom To Speak Up Guardians, accessed Feb 2019: <https://www.cqc.org.uk/national-guardians-office/content/national-guardians-office>
38. The Behavioural Insights Team. Cabinet Office, accessed Feb 2019: <https://www.behaviouralinsights.co.uk/>
39. Michie S, Richardson M, Johnston M, et al. The behavior change technique taxonomy (v1) of 93 hierarchically clustered techniques: building an international consensus for the reporting of behavior change interventions. *Ann Behav Med*. 2013 Aug;46(1):81-95. doi: 10.1007/s12160-013-9486-6.
40. Michie S, West R, Sheals K, et al. Evaluating the effectiveness of behavior change techniques in health-related behavior: a scoping review of methods used. *Translational Behavioral Medicine* 2018; 8(2): 212–224, <https://doi.org/10.1093/tbm/ibx019>
41. Johnson MJ, May CR. Promoting professional behaviour change in healthcare: what interventions work, and why? A theory-led overview of systematic reviews *BMJ Open* 2015; 5(9): e008592. doi: 10.1136/bmjopen-2015-008592
42. Chauhan BF, Jeyaraman MM, Mann AS, et al. Behavior change interventions and policies influencing primary healthcare professionals' practice—an overview of reviews. *Implement Sci*. 2017;12:3. doi: 10.1186/s13012-016-0538-8.
43. Michie S, van Stralen MM, West R. The behaviour change wheel: a new method for characterising and designing behaviour change interventions. *Implement Sci*. 2011;6:42.
44. Kahneman D. *Thinking, fast and slow*. Penguin 2012.
45. Petty R E, Cacioppo J T. The effects of involvement on responses to argument quantity and quality: Central and peripheral routes to persuasion. *Journal of Personality and Social Psychology*, 1984;46(1), 69-81. <http://dx.doi.org/10.1037/0022-3514.46.1.69>
46. O'Keefe D. The Elaboration Likelihood Model. In Dillard JP and Shen L. *The SAGE Handbook of Persuasion: Developments in Theory and Practice*. SAGE publications 2012.



- 1
- 2
- 3 47. Dolan P, Hallsworth M, Halpern D, et al. Influencing behaviour: The mindspace way. *Journal of Economic Psychology* 2012; 33(1): 264-277.
- 4
- 5
- 6 48. Kolb D A, Fry R (1975) Toward an applied theory of experiential learning. in C. Cooper
- 7 (ed.) *Theories of Group Process*, London: John Wiley
- 8
- 9 49. Schön D A (1983). *The reflective practitioner: How professionals think in action*. New
- 10 York: Basic Books.
- 11 50. Pedler M, Burgoyne J, Boydell T (1991, rev 1996) *The Learning Company. A strategy for*
- 12 *sustainable development*, London: McGraw-Hill.
- 13 51. Mezirow J. 1981. A critical theory of adult learning and education. *Adult Educ* 32(1):3–
- 14 24.
- 15 52. Sandars J. The use of reflection in medical education: AMEE Guide No. 44. *Med Teach*.
- 16 2009 Aug;31(8):685-95.
- 17 53. Nonaka I, von Krogh G. Tacit Knowledge and Knowledge Conversion: Controversy and
- 18 Advancement in Organizational Knowledge Creation Theory. *Organization Science* 2009;
- 19 20(3): 635-52.
- 20 54. Bandura A . Self-efficacy: Toward a unifying theory of behavioral change. *Psychological*
- 21 *Review*, 1977;84(2), 191-215. <http://dx.doi.org/10.1037/0033-295X.84.2.191>
- 22 55. Aronson L. Twelve tips for teaching reflection at all levels of medical education. *Med*
- 23 *Teach*. 2011;33(3):200-5. doi: 10.3109/0142159X.2010.507714. [Epub 2010 Sep 27]
- 24 56. Broadwell MM. Teaching for learning (XVI). *The Gospel Guardian*, 20 February 1969.
- 25 [http://www.wordsfityspoken.org/gospel\\_guardian/v20/v20n41p1-3a.html](http://www.wordsfityspoken.org/gospel_guardian/v20/v20n41p1-3a.html)
- 26 57. Dewey, J. (1933). *How we think: A restatement of the relation of reflective thinking to*
- 27 *the educative process*. Boston: D.C. Heath and Company.
- 28 58. General Medical Council. *The Reflective Practitioner. Guidance for doctors and medical*
- 29 *students*. Academy of Medical Royal Colleges, the UK Conference of Postgraduate
- 30 *Medical Deans, the General Medical Council, and the Medical Schools Council. GMC,*
- 31 *London 2018.* [https://www.gmc-uk.org/education/standards-guidance-and-](https://www.gmc-uk.org/education/standards-guidance-and-curricula/guidance/the-reflective-practitioner---guidance-for-doctors-and-medical-students)
- 32 [curricula/guidance/the-reflective-practitioner---guidance-for-doctors-and-medical-](https://www.gmc-uk.org/education/standards-guidance-and-curricula/guidance/the-reflective-practitioner---guidance-for-doctors-and-medical-students)
- 33 [students](https://www.gmc-uk.org/education/standards-guidance-and-curricula/guidance/the-reflective-practitioner---guidance-for-doctors-and-medical-students)
- 34 59. Winkel AF, Yingling S, Jones AA, et al. Reflection as a Learning Tool in Graduate Medical
- 35 *Education: A Systematic Review. J Grad Med Educ*. 2017 Aug;9(4):430-439. doi:
- 36 10.4300/JGME-D-16-00500.1.
- 37 60. Ferguson J, Wakeling J, Bowie P. Factors influencing the effectiveness of multisource
- 38 *feedback in improving the professional practice of medical doctors: a systematic review.*
- 39 *BMC Med Educ*. 2014; 14: 76.
- 40 61. Boiko O, Campbell JL, Elmore N, et al. The role of patient experience surveys in quality
- 41 *assurance and improvement: a focus group study in English general practice. Health*
- 42 *Expect*. 2015 Dec;18(6):1982-94.
- 43 62. Kappes A, Faber NS, Kahane G, et al. Concern for Others Leads to Vicarious Optimism.
- 44 *Psychol Sci*. 2018 Mar;29(3):379-389. doi: 10.1177/0956797617737129. [Epub 2018 Jan
- 45 30]
- 46
- 47
- 48
- 49
- 50
- 51
- 52
- 53
- 54
- 55
- 56
- 57
- 58
- 59
- 60



- 1  
2  
3 63. Farrington C, Burt J, Boiko O, et al. Doctors' engagements with patient experience  
4 surveys in primary and secondary care: a qualitative study. *Health Expectations*  
5 2017;20(3):385-394. doi:10.1111/hex.12465.  
6  
7 64. Garrett N, González-Garzón AM, Foulkes L, et al. Updating Beliefs under Perceived  
8 Threat. *J Neurosci*. 2018 Sep 5; 38(36): 7901–7911. doi: 10.1523/JNEUROSCI.0716-  
9 18.2018  
10  
11 65. Ehrlinger J, Johnson K, Banner M, et al. Why the Unskilled Are Unaware: Further  
12 Explorations of (Absent) Self-Insight Among the Incompetent. *Organ Behav Hum Decis*  
13 *Process*. 2008 Jan 1;105(1):98-121.  
14  
15 66. The Bawa-Garba case. BMJ, accessed Feb 2019: <https://www.bmj.com/bawa-garba>  
16  
17 67. Sanson-Fisher R, Hobden B, Waller A, et al. Methodological quality of teaching  
18 communication skills to undergraduate medical students: a mapping review. *BMC Med*  
19 *Educ*. 2018 Jun 27;18(1):151.  
20  
21 68. Papageorgiou A, Loke Y K, Fomage M. Communication skills training for mental health  
22 professionals working with people with severe mental illness. *Cochrane Database Syst*  
23 *Rev*. 2017 Jun 13;6:CD010006.  
24  
25 69. Ditton-Phare P, Loughland C, Duvivier R, et al. Communication skills in the training of  
26 psychiatrists: A systematic review of current approaches. *Aust N Z J Psychiatry*. 2017  
27 Jul;51(7):675-692.  
28  
29 70. Moore PM, Rivera Mercado S, Grez Artigues M, et al. Communication skills training for  
30 healthcare professionals working with people who have cancer. *Cochrane Database Syst*  
31 *Rev*. 2013 Mar 28;(3):CD003751.  
32  
33 71. Brighton LJ, Koffman J, Hawkins A, et al. A Systematic Review of End-of-Life Care  
34 Communication Skills Training for Generalist Palliative Care Providers: Research Quality  
35 and Reporting Guidance. *J Pain Symptom Manage*. 2017 Sep;54(3):417-425.  
36  
37 72. Oladeru O A, Hamadu M, Cleary P D, et al. House Staff Communication Training and  
38 Patient Experience Scores. *J Patient Exp*. 2017 Mar; 4(1): 28–36. Published online 2017  
39 Feb 20  
40  
41 73. Chung H O, Oczkowski S J, Hanvey L, et al. Educational interventions to train healthcare  
42 professionals in end-of-life communication: a systematic review and meta-analysis.  
43 *BMC Med Educ*. 2016; 16: 131  
44  
45 74. Curtis J R, Back A L, Ford D W, et al. Effect of communication skills training for residents  
46 and nurse practitioners on quality of communication with patients with serious illness: a  
47 randomized trial. *JAMA*. 2013 Dec 4;310(21):2271-81  
48  
49 75. Haynes A B, Edmondson L, Lipsitz S R, et al. Mortality Trends After a Voluntary Checklist-  
50 based Surgical Safety Collaborative. *Ann Surg*. 2017 Dec;266(6):923-929.  
51  
52 76. Derksen F, Bensing J, Lagro-Janssen A. Effectiveness of empathy in general practice: a  
53 systematic review. *Br J Gen Pract*. 2013 Jan;63(606):e76-84.  
54  
55 77. Kelm Z, Womer J, Walter J K, et al. Interventions to cultivate physician empathy: a  
56 systematic review. *BMC Med Educ*. 2014 Oct 14;14:219.  
57  
58 78. Dwamena F, Holmes-Rovner M, Gaulden C M, et al. Interventions for providers to  
59 promote a patient-centred approach in clinical consultations. *Cochrane Database Syst*  
60 *Rev*. 2012 Dec 12;12:CD003267.

- 1  
2  
3 79. Mazzi M A, Rimondini M, Deveugele M, et al. What do people appreciate in physicians'  
4 communication? An international study with focus groups using videotaped medical  
5 consultations. *Health Expect* 2015 Oct;18(5):1215-26.  
6  
7 80. Agledahl K M, Gulbrandsen P, Forde R, et al. Courteous but not curious: how doctors'  
8 politeness masks their existential neglect. A qualitative study of video-recorded patient  
9 consultations. *J Med Ethics*. 2011 Nov;37(11):650-4.  
10  
11 81. Beach M C, Sugarman J, Johnson R L, et al. Do patients treated with dignity report higher  
12 satisfaction, adherence, and receipt of preventive care? *Ann Fam Med*. 2005 Jul-  
13 Aug;3(4):331-8.  
14  
15 82. Laganá L, Gavrilova B A, Carter D B, et al. A Randomized Controlled Study on the Effects  
16 of a Documentary on Students' Empathy and Attitudes towards Older Adults. *Psychol*  
17 *Cogn Sci*. 2017;3(3):79-88.  
18  
19 83. Nelson S W, Germann C A, MacVane C Z, et al. Intern as Patient: A Patient Experience  
20 Simulation to Cultivate Empathy in Emergency Medicine Residents. *West J Emerg Med*.  
21 2018 Jan;19(1):41-48  
22  
23 84. Pollak K I, Alexander S C, Tulsy J A, et al. Physician empathy and listening: associations  
24 with patient satisfaction and autonomy. *J Am Board Fam Med*. 2011 Nov-Dec;24(6):665-  
25 72.  
26  
27 85. Buckman R, Tulsy J A, Rodin G. Empathic responses in clinical practice: intuition or  
28 tuition? *CMAJ*. 2011 Mar 22;183(5):569-71  
29  
30 86. Amutio-Kareaga A, Garcia-Campayo J, Delgado L C, et al. Improving Communication  
31 between Physicians and Their Patients through Mindfulness and Compassion-Based  
32 Strategies: A Narrative Review. *J Clin Med*. 2017 Mar 17;6(3).  
33  
34 87. Kiosses V N, Karathanos V T, Tatsioni A. Empathy promoting interventions for health  
35 professionals: a systematic review of RCTs. *Journal of Compassionate Health Care* 2016  
36 3:7  
37  
38 88. Empathy: The Human Connection to Patient Care, accessed Feb 2019:  
39 [https://www.youtube.com/watch?v=cDDWvj\\_q-o8](https://www.youtube.com/watch?v=cDDWvj_q-o8)  
40  
41 89. TEDxMaastricht - Fred Lee - "Patient Satisfaction or Patient Experience?" accessed Feb  
42 2019: <https://www.youtube.com/watch?v=tylvc9dY400>  
43  
44 90. Say This, Not That: Patient Experience Video. Eastern Idaho Regional Medical Center,  
45 accessed Feb 2019: <https://www.youtube.com/watch?v=r842Ylpa-nQ>  
46  
47 91. Moore G F, Audrey S, Barker M, et al. Process evaluation of complex interventions:  
48 Medical Research Council guidance. *BMJ* 2015; 350:h1258. doi: 10.1136/bmj.h1258.  
49  
50 92. Wenger E. Communities of Practice: A brief introduction. STEP Leadership Workshop,  
51 University of Oregon, October, 2011.  
52 <https://scholarsbank.uoregon.edu/xmlui/handle/1794/11736>  
53  
54 93. Li L C, Grimshaw J M, Nielsen C, et al. Evolution of Wenger's concept of community of  
55 practice. *Implement Sci* 2009;4:11 doi:10.1186/1748-5908-4-11  
56  
57 94. Dixon-Woods M, Leslie M, Bion J, et al. What Counts? An Ethnographic Study of Infection  
58 Data Reported to a Patient Safety Program. *Milbank Quarterly* 2012; 90(3): 548–591  
59  
60

- 1  
2  
3 95. Dixon-Woods M, Leslie M, Tarrant C, et al. Explaining Matching Michigan: an  
4 ethnographic study of a patient safety program. *Implementation Science* 2013, 8:70  
5 doi:10.1186/1748-5908-8-70.  
6  
7 96. Wall R J, Engelberg R A, Downey L, et al. Refinement, scoring and validation of the Family  
8 Satisfaction in Intensive Care Unit (FS-ICU) survey. *Critical Care Medicine* 2007; Vol/is  
9 35/1 p271-279  
10  
11 97. Wright S E, Walmsley E, Harvey S E, et al. Family-Reported Experiences Evaluation (FREE)  
12 study: a mixed-methods study to evaluate families' satisfaction with adult critical care  
13 services in the NHS. *Health Services and Delivery Research* 2015; 3(45).  
14  
15 98. Harrison D A, Ferrando-Vivas P, Wright S E, et al. Family-Reported Experiences  
16 Evaluation Study Investigators. Psychometric assessment of the Family Satisfaction in  
17 the Intensive Care Unit questionnaire in the United Kingdom. *J Crit Care*. 2017  
18 Apr;38:346-350. doi: 10.1016/j.jcrc.2016.10.023. [Epub 2016 Nov 5]  
19  
20 99. NHS Staff Friends & Family Test, accessed Feb 2019:  
21 <https://www.england.nhs.uk/fft/staff-fft/>  
22  
23 100. Hospital Survey on Patient Safety Culture, accessed Feb 2019:  
24 [https://www.ahrq.gov/sites/default/files/wysiwyg/professionals/quality-patient-](https://www.ahrq.gov/sites/default/files/wysiwyg/professionals/quality-patient-safety/patientsafetyculture/hospital/resources/hospscanform.pdf)  
25 [safety/patientsafetyculture/hospital/resources/hospscanform.pdf](https://www.ahrq.gov/sites/default/files/wysiwyg/professionals/quality-patient-safety/patientsafetyculture/hospital/resources/hospscanform.pdf)  
26  
27 101. Teamwork and Safety Climate Survey, accessed Feb 2019:  
28 <https://med.uth.edu/chqs/files/2012/05/Survey-SAQ-Teamwork-Safety-Climate-.pdf>  
29  
30 102. General Medical Council Trainee Survey, accessed Feb 2019: [https://www.gmc-](https://www.gmc-uk.org/education/how-we-quality-assure/national-training-surveys/national-training-surveys---doctors-in-training)  
31 [uk.org/education/how-we-quality-assure/national-training-surveys/national-training-](https://www.gmc-uk.org/education/how-we-quality-assure/national-training-surveys/national-training-surveys---doctors-in-training)  
32 [surveys---doctors-in-training](https://www.gmc-uk.org/education/how-we-quality-assure/national-training-surveys/national-training-surveys---doctors-in-training)  
33  
34 103. Grant A M, Franklin J, Langford P. The Self-Reflection and Insight Scale: A New Measure  
35 of Private Self-Consciousness. *Social Behaviour and Personality* 2002, 30(8), 821-836.  
36  
37 104. Glaser B, Strauss A. 1967, The discovery of grounded theory, Aldine Publishing  
38 Company, Hawthorne, NY.  
39  
40 105. Batalden M, Batalden P, Margolis P, et al. Coproduction of healthcare service. *BMJ*  
41 *Qual Saf*. 2016 Jul;25(7):509-17. doi: 10.1136/bmjqs-2015-004315.  
42  
43 106. Scott J, Heavey E, Waring J, et al. Healthcare professional and patient codesign and  
44 validation of a mechanism for service users to feedback patient safety experiences  
45 following a care transfer: a qualitative study. *BMJ Open*. 2016 Jul 12;6(7):e011222. doi:  
46 10.1136/bmjopen-2016-011222.  
47  
48 107. Better Services by Design, accessed Feb 2019 , [http://www.bsbd.org.uk/double-](http://www.bsbd.org.uk/double-diamond-design-process/)  
49 [diamond-design-process/](http://www.bsbd.org.uk/double-diamond-design-process/)  
50  
51 108. Langley J , Wolstenholme D, Cooke J. 2018. "Collective Making' as Knowledge  
52 Mobilisation: The Contribution of Participatory Design in the Co-Creation of Knowledge  
53 in Healthcare." *BMC Health Services Research* 18 (1). BMC Health Services Research:  
54 585. doi:10.1186/s12913-018-3397-y.  
55  
56  
57  
58  
59  
60



Figure 1: Conceptual model linking theories of behaviour change to those of reflective learning

90x90mm (300 x 300 DPI)

1  
2  
3  
4  
5  
6  
7  
8  
9  
10  
11  
12  
13  
14  
15  
16  
17  
18  
19  
20  
21  
22  
23  
24  
25  
26  
27  
28  
29  
30  
31  
32  
33  
34  
35  
36  
37  
38  
39  
40  
41  
42  
43  
44  
45  
46  
47  
48  
49  
50  
51  
52  
53  
54  
55  
56  
57  
58  
59  
60



Figure 2: PEARL diagnostic framework using the COM-B model

90x90mm (300 x 300 DPI)

1  
2  
3  
4  
5  
6  
7  
8  
9  
10  
11  
12  
13  
14  
15  
16  
17  
18  
19  
20  
21  
22  
23  
24  
25  
26  
27  
28  
29  
30  
31  
32  
33  
34  
35  
36  
37  
38  
39  
40  
41  
42  
43  
44  
45  
46  
47  
48  
49  
50  
51  
52  
53  
54  
55  
56  
57  
58  
59  
60

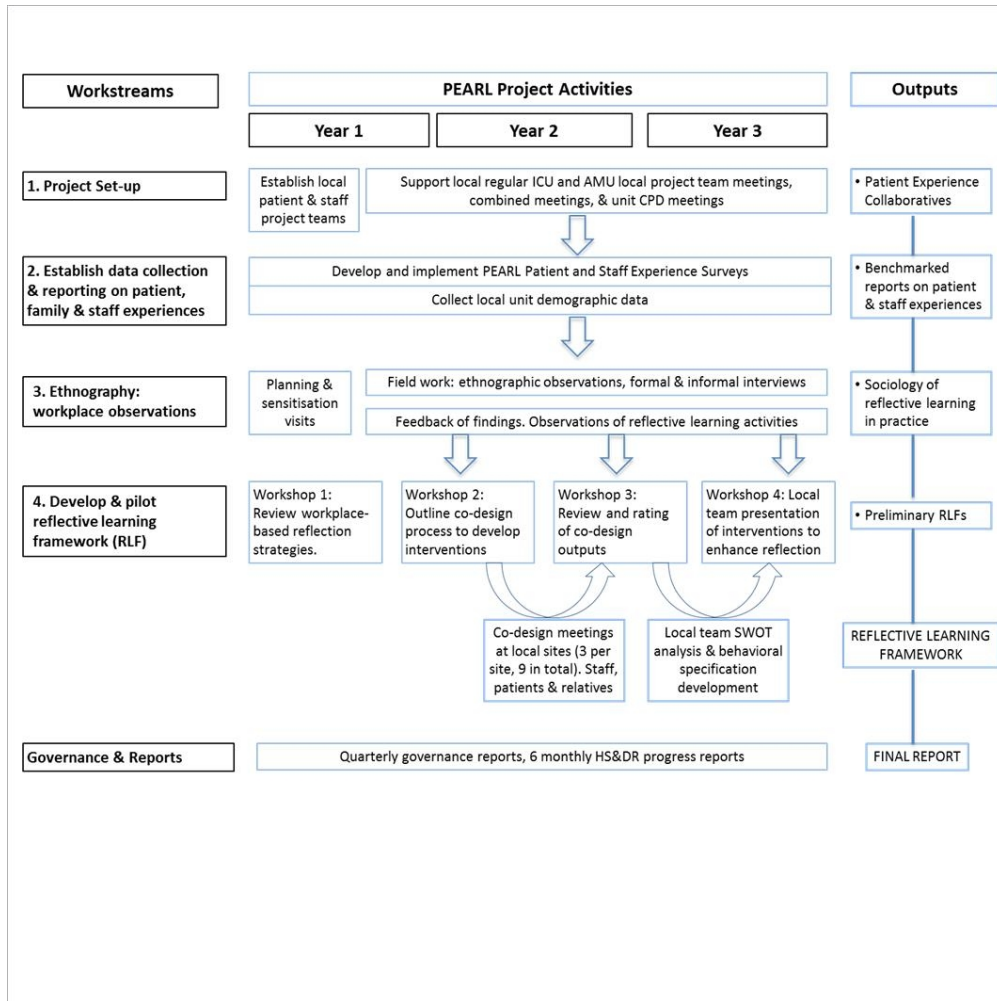

Figure 3: PEARL Project Gantt Chart

90x90mm (300 x 300 DPI)
